# Supplementary material for: Nickel nanoparticles assisted regioselective synthesis of pyrazoloquinolinone and triazoloquinazolinone derivatives
Source: Royal Society of Chemistry journal article supplement (doi:10.1039/c4nj02372b), 2015-01-01

## SUPPLEMENTARY INFORMATION FOR

### *Nickel nanoparticles assisted regioselective synthesis of pyrazoloquinolinone and triazoloquinazolinone derivatives*

Nongthombam Geetmani Singh<sup>a</sup>, Ramamoorthy Nagarajaprakash<sup>b</sup>, Jims World Star Rani<sup>a</sup>,

Chingrishon Kathing<sup>a</sup>, Ridaphun Nongrum<sup>a</sup> and Rishanlang Nongkhlaw<sup>a\*</sup>

<sup>a</sup>Centre for Advanced Studies in Chemistry, North Eastern Hill University, Shillong, Meghalaya-793022, India

<sup>b</sup>Department of Chemistry, Pondicherry University, Puducherry 605014, India

\* E-mail: [rlongkhlaw@nehu.ac.in](mailto:rlongkhlaw@nehu.ac.in); Tel.: +91-364-2722628; fax: +91-364-2550076;

| <b>Table of content</b>                                                                  | <b>Page No.</b> |
|------------------------------------------------------------------------------------------|-----------------|
| 1. Experimental Section                                                                  | 2               |
| 2. <b>Table S.I. 1.</b> X-ray crystallography data for compound <b>5c</b>                | 3               |
| 3. <b>Table S.I. 2.</b> X-ray crystallography data for compound <b>6a</b>                | 4               |
| 4. Analytical data of the compound <b>5a-h</b> and <b>6a-j</b>                           | 5-9             |
| 5. <sup>1</sup> H & <sup>13</sup> C NMR Spectra of compounds <b>5a-h</b> and <b>6a-j</b> | 10-45           |

## Experimental

All the chemicals involved in the synthesis were purchased from Alfa Aesar, Sigma Aldrich, Merck and were used without further purification. Purity of the products were confirmed by infrared (IR), <sup>1</sup>H-NMR, <sup>13</sup>C-NMR and mass spectra besides X-ray diffraction (XRD) and melting point data. Melting points were determined in open capillary tubes and are uncorrected. IR spectra were recorded in KBr pellets on a Perkin Elmer Spectrum 400 FTIR instrument, and the frequencies are expressed in cm<sup>-1</sup>. <sup>1</sup>H-NMR and <sup>13</sup>C-NMR spectra were recorded on Bruker Avance II-400 spectrometer in DMSO-d<sub>6</sub> (Chemical shifts in δ with TMS as internal standard). Mass spectral data were obtained with a JEOL D-300 (ESI) mass spectrometer. Single crystal XRD data was obtained with Xcalibur-Eos-Gemini instrument and powder XRD analysis was done with X'Pert Pro instrument. The EDAX and SEM imaging were carried out by scanning electron microscope of make JSM-6360 (JEOL) and the TEM imaging was done using transmission electron microscope of make JEM-2100, 200 kV(JEOL). All reactions were monitored by thin layer chromatography (TLC) using precoated aluminum sheets (silica gel 60 F 254 0.2-mm thickness) and developed in an iodine chamber.

### X-ray crystallography

The single crystal X-ray diffraction (XRD) data were collected at 293 K with Mo Ka radiation (λ 0.71073 Å) using Agilent Xcalibur (Eos, Gemini) diffractometer equipped with a graphite monochromator. The software used for data collection CrysAlis PRO (Agilent, 2011), data reduction CrysAlis PRO and cell refinement CrysAlis PRO. The structure were solved by direct methods and refined by Olex2.refine.

### General procedure for preparation of 5a-h, 6a-j

In a 50 ml round bottom flask, 3-Amino-1*H*-1,2,4-triazole/3-Amino-5-methyl-1*H*-pyrazole (1 mmol), aldehyde (1 mmol) and dimedone (1 mmol), nickel nanoparticle (10 mol %) were refluxed in acetonitrile (10 ml) for 10 minutes. On cooling, solid crystals separated out. The nickel nanoparticles were retrieved magnetically and the reaction mixture was filtered. The residue was dried and analyzed.

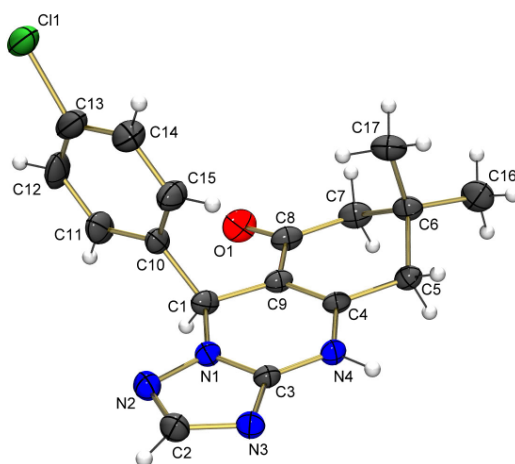

**Table S.I.1.** X-ray crystallography data for compound **5c**. (CCDC 1024257)

|                                            |                                                     |
|--------------------------------------------|-----------------------------------------------------|
| Empirical formula                          | C <sub>17</sub> H <sub>17</sub> Cl N <sub>4</sub> O |
| Formula weight                             | 328.80                                              |
| Crystal system                             | Triclinic                                           |
| Space group                                | P-1                                                 |
| <i>a</i> (Å)                               | 6.0023(11)                                          |
| <i>b</i> (Å)                               | 12.317(2)                                           |
| <i>c</i> (Å)                               | 12.460(2)                                           |
| $\alpha$ (°)                               | 67.981(17)                                          |
| $\beta$ (°)                                | 77.245(15)                                          |
| $\gamma$ (°)                               | 80.977(15)                                          |
| Volume (Å <sup>3</sup> )                   | 830.1(3)                                            |
| $\rho$ (calculated) (g cm <sup>-3</sup> )  | 1.3154                                              |
| T(K)                                       | 291.9(9)                                            |
| Absorption coefficient (mm <sup>-1</sup> ) | 0.240                                               |
| Total reflection collected                 | 6065                                                |
| Independent reflection                     | 3734                                                |
| Refine parameter                           | 209                                                 |
| $\theta$ range (°)                         | 6.78 to 57.48                                       |
| Final R Indexes [ $I \geq 2\sigma(I)$ ]    | R1 = 0.0535                                         |
| Final R indexes [all data]                 | R1 = 0.0850                                         |
| Goodness-of-fit on F <sup>2</sup>          | 1.036                                               |

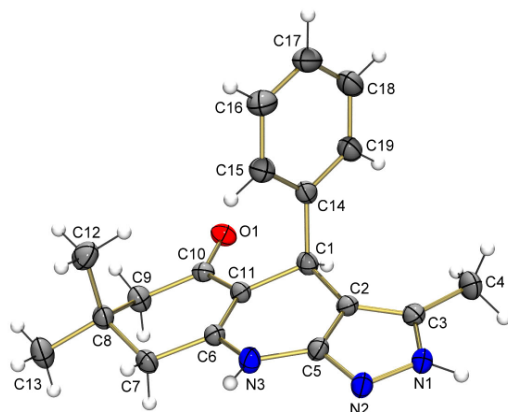

**Table S.I.2.** X-ray crystallography data for compound **6a**. (CCDC 1024256)

|                                             |                    |
|---------------------------------------------|--------------------|
| Empirical formula                           | $C_{19}H_{21}N_3O$ |
| Formula weight                              | 307.39             |
| Crystal system                              | Monoclinic         |
| Space group                                 | $P2_1/n$           |
| $a(\text{\AA})$                             | 10.1735(11)        |
| $b(\text{\AA})$                             | 14.3043(10)        |
| $c(\text{\AA})$                             | 11.2897(9)         |
| $\alpha(^{\circ})$                          | 90.00              |
| $\beta(^{\circ})$                           | 96.376(8)          |
| $\gamma(^{\circ})$                          | 90.00              |
| Volume ( $\text{\AA}^3$ )                   | 1632.8(3)          |
| $\rho$ (calculated) ( $\text{g cm}^{-3}$ )  | 1.2545             |
| T(K)                                        | 292.34(10)         |
| Absorption coefficient ( $\text{mm}^{-1}$ ) | 0.079              |
| Total reflection collected                  | 7067               |
| Independent reflection                      | 3707               |
| Refine parameter                            | 211                |
| $\theta$ range ( $^{\circ}$ )               | 6.38 to 57.38      |
| Final R Indexes [ $I \geq 2\sigma(I)$ ]     | $R1 = 0.0588$      |
| Final R indexes [all data]                  | $R1 = 0.1646$      |
| Goodness-of-fit on $F^2$                    | 0.988              |

## ANALYTICAL DATA

### 6,6-dimethyl-9-phenyl-5,6,7,9-tetrahydro-[1,2,4]triazolo[5,1-*b*]quinazolin-8(4*H*)-one (5a):

Light yellow crystal, Yield: 90 %, Melting point: 249-251°C .

IR (KBr): 3445, 2962, 1650, 1594, 1374, 1252, 721 cm<sup>-1</sup>. <sup>1</sup>H NMR (DMSO-D<sub>6</sub>, 400 MHz): δ 11.14 (s, 1H), 7.68 (s, 1H), 7.17-7.29 (m, 5H), 6.19 (s, 1H), 2.52-2.59 (m, 2H), 2.19 (d, *J* = 16Hz, 1H), 2.05 (d, *J* = 16Hz, 1H), 1.03 (s, 3H), 0.95 (s, 3H). <sup>13</sup>C NMR (DMSO-D<sub>6</sub>, 100 MHz): δ 26.77, 28.45, 32.16, 49.74, 57.89, 105.55, 126.92, 127.69, 128.23, 141.55, 146.82, 150.24, 150.39, 192.96. ESI- MS: *m/z* 295 [M+H]<sup>+</sup>.

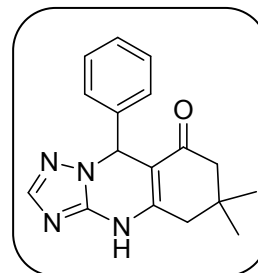

### 6,6-dimethyl-9-(4-nitrophenyl)-5,6,7,9-tetrahydro-[1,2,4]triazolo[5,1-*b*]quinazolin-8(4*H*)-one (5b):

Pale yellow crystal, Yield: 93%, Melting point: 301-302°C.

IR (KBr): 3412, 3090, 2964, 1646, 1579, 1351, 1253, 729 cm<sup>-1</sup>. <sup>1</sup>H NMR (DMSO-D<sub>6</sub>, 400 MHz): δ 11.31 (s, 1H), 8.14 (d, *J* = 8Hz, 2H), 7.73 (s, 1H), 7.47 (d, *J* = 8Hz, 2H), 6.36 (s, 1H), 2.56 (d, *J* = 16Hz, 1H), 2.49 (d, *J* = 16Hz, 1H), 2.19 (d, *J* = 16Hz, 1H), 2.05 (d, *J* = 16Hz, 1H), 1.03 (s, 3H), 0.95 (s, 3H). <sup>13</sup>C NMR (DMSO-D<sub>6</sub>, 100 MHz): δ 26.92, 28.26, 32.21, 49.63, 57.49, 104.72, 123.55, 128.46, 146.81, 146.89, 148.38, 150.40, 150.97, 193.01. ESI-MS: *m/z* 340 [M+H]<sup>+</sup>.

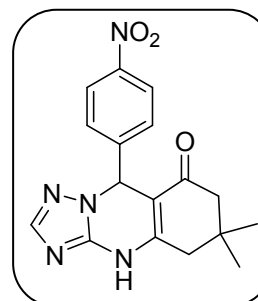

### 9-(4-chlorophenyl)-6,6-dimethyl-5,6,7,9-tetrahydro-[1,2,4]triazolo[5,1-*b*]quinazolin-8(4*H*)-one (5c):

Pale yellow crystal, Yield: 92%, Melting point: 297-298°C.

IR (KBr): 3436, 3094, 2961, 1649, 1578, 1367, 1254, 760 cm<sup>-1</sup>. <sup>1</sup>H NMR (DMSO-D<sub>6</sub>, 400 MHz): δ 10.95 (s, 1H), 7.45 (s, 1H), 7.09 (d, *J* = 8Hz, 2H), 6.95 (d, *J* = 8Hz, 2H), 5.97 (s, 1H), 2.25-2.34 (m, 2H), 1.95 (d, *J* = 16Hz, 1H), 1.81 (d, *J* = 16Hz, 1H), 0.79 (s, 3H), 0.71 (s, 3H). <sup>13</sup>C NMR (DMSO-D<sub>6</sub>, 100 MHz): δ 26.87, 28.36, 32.17, 49.71, 57.34, 105.16, 128.25, 128.86, 132.26, 140.49, 146.76, 150.17, 150.55, 192.98. ESI-MS: *m/z* 329 [M+H]<sup>+</sup>.

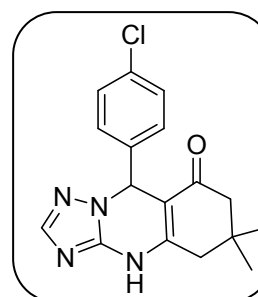

### 9-(4-fluorophenyl)-6,6-dimethyl-5,6,7,9-tetrahydro-[1,2,4]triazolo[5,1-*b*]quinazolin-8(4*H*)-one (5d):

Colourless crystal, Yield: 90%, Melting point: 303-305°C.

IR (KBr): 3450, 3091, 2963, 1649, 1581, 1365, 1255, 762 cm<sup>-1</sup>. <sup>1</sup>H NMR (DMSO-D<sub>6</sub>, 400 MHz): δ 11.16 (s, 1H), 7.69 (s, 1H), 7.22-7.23 (m, 2H), 7.08-7.10 (m, 2H), 6.22 (s, 1H), 2.53-2.58 (m, 2H), 2.19 (d, *J* = 16Hz, 1H), 2.06 (d, *J* = 16Hz, 1H), 1.03 (s, 3H), 0.96 (s, 3H). <sup>13</sup>C NMR (DMSO-D<sub>6</sub>, 100 MHz): δ 27.36, 28.87, 32.66, 50.23, 57.73, 105.86, 115.39, 129.50, 138.34, 147.24, 150.59, 160.74, 163.16, 193.45. ESI-MS: *m/z* 313 [M+H]<sup>+</sup>.

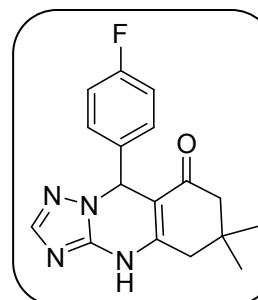

**9-(4-methoxyphenyl)-6,6-dimethyl-5,6,7,9-tetrahydro-[1,2,4]triazolo[5,1-*b*]quinazolin-8(4*H*)-one (5e):**

Colourless crystal, Yield: 88%, Melting point: 230-232°C.

IR (KBr): 3436, 2961, 1649, 1580, 1367, 1246, 745  $\text{cm}^{-1}$ .  $^1\text{H}$  NMR (DMSO- $\text{D}_6$ , 400 MHz):  $\delta$  10.87 (s, 1H), 7.45 (s, 1H), 6.87 (d,  $J = 8\text{Hz}$ , 2H), 6.60 (d,  $J = 8\text{Hz}$ , 2H), 5.93 (s, 1H), 3.47 (s, 3H), 2.28-2.37 (m, 2H), 1.98 (d,  $J = 16\text{Hz}$ , 1H), 1.83 (d,  $J = 16\text{Hz}$ , 1H), 0.82 (s, 3H), 0.75 (s, 3H).  $^{13}\text{C}$  NMR (DMSO- $\text{D}_6$ , 100 MHz):  $\delta$  26.79, 28.49, 32.15, 49.78, 54.99, 57.30, 105.71, 113.54, 128.09, 133.82, 146.72, 150.14, 158.66, 192.94. ESI-MS:  $m/z$  325  $[\text{M}+\text{H}]^+$ .

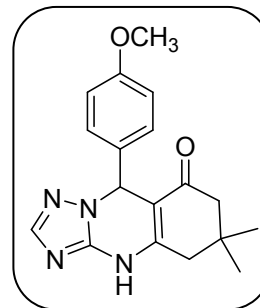

**6,6-dimethyl-9-(3-nitrophenyl)-5,6,7,9-tetrahydro-[1,2,4]triazolo[5,1-*b*]quinazolin-8(4*H*)-one (5f):**

Pale yellow solid, Yield: 85%, Melting point: 290-292°C.

IR (KBr): 3436, 3082, 2960, 1645, 1580, 1367, 1256, 732  $\text{cm}^{-1}$ .  $^1\text{H}$  NMR (DMSO- $\text{D}_6$ , 400 MHz):  $\delta$  11.09 (s, 1H), 7.84-7.90 (m, 2H), 7.52 (s, 1H), 7.37-7.44 (m, 2H), 6.20 (s, 1H), 2.28-2.40 (m, 2H), 1.99 (d,  $J = 16\text{Hz}$ , 1H), 1.86 (d,  $J = 16\text{Hz}$ , 1H), 0.829 (s, 3H), 0.756 (s, 3H).  $^{13}\text{C}$  NMR (DMSO- $\text{D}_6$ , 100 MHz):  $\delta$  26.85, 28.31, 32.23, 49.65, 57.39, 104.59, 121.66, 122.81, 130.04, 133.71, 143.45, 146.77, 147.58, 150.42, 151.13, 193.09. ESI-MS:  $m/z$  340  $[\text{M}+\text{H}]^+$ .

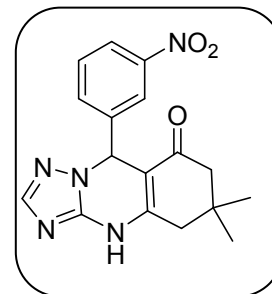

**9-(4-bromophenyl)-6,6-dimethyl-5,6,7,9-tetrahydro-[1,2,4]triazolo[5,1-*b*]quinazolin-8(4*H*)-one (5g):**

Yellow crystal, Yield: 91%, Melting point: 282-285°C.

IR (KBr): 3436, 3090, 2965, 1650, 1584, 1367, 1255, 759  $\text{cm}^{-1}$ .  $^1\text{H}$  NMR (DMSO- $\text{D}_6$ , 400 MHz):  $\delta$  11.19 (s, 1H), 7.70 (s, 1H), 7.47 (d,  $J = 8\text{Hz}$ , 2H), 7.13 (d,  $J = 8\text{Hz}$ , 2H), 6.19 (s, 1H), 2.54-2.58 (m, 2H), 2.19 (d,  $J = 16\text{Hz}$ , 1H), 2.05 (d,  $J = 16\text{Hz}$ , 1H), 1.03 (s, 3H), 0.95 (s, 3H).  $^{13}\text{C}$  NMR (DMSO- $\text{D}_6$ , 100 MHz):  $\delta$  26.87, 28.36, 32.18, 49.71, 57.43, 105.12, 120.85, 129.22, 131.18, 140.91, 146.75, 150.18, 150.56, 192.99. ESI-MS:  $m/z$  373  $[\text{M}]^+$ , 375  $[\text{M}+2]^+$ .

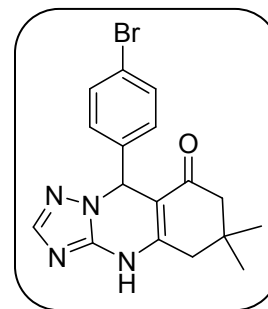

**9-(4-hydroxyphenyl)-6,6-dimethyl-5,6,7,9-tetrahydro-[1,2,4]triazolo[5,1-*b*]quinazolin-8(4*H*)-one (5h):**

Pale yellow solid, Yield: 89%, Melting point: 303-304°C.

IR (KBr): 3348, 3096, 2932, 1631, 1587, 1370, 1269, 731  $\text{cm}^{-1}$ .  $^1\text{H}$  NMR (DMSO- $\text{D}_6$ , 400 MHz):  $\delta$  11.04 (s, 1H), 9.39 (s, 1H), 7.65 (s, 1H), 6.96 (d,  $J = 8\text{Hz}$ , 2H), 6.62 (d,  $J = 8\text{Hz}$ , 2H), 6.08 (s, 1H), 2.57-2.68 (m, 2H), 2.18 (d,  $J = 16\text{Hz}$ , 1H), 2.05 (d,  $J = 16\text{Hz}$ , 1H), 1.03 (s, 3H), 0.96 (s, 3H).  $^{13}\text{C}$  NMR (DMSO- $\text{D}_6$ , 100 MHz):  $\delta$  26.79, 28.51, 32.14, 49.80, 52.99, 57.33, 105.86, 114.84, 132.21, 128.07, 146.69, 149.83, 150.03, 156.87, 192.94. ESI-MS:  $m/z$  311  $[\text{M}+\text{H}]^+$ .

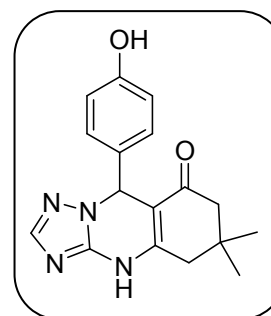

**3,7,7-trimethyl-4-phenyl-6,7,8,9-tetrahydro-2*H*-pyrazolo[3,4-*b*]quinolin-5(4*H*)-one (6a):**

Colourless crystal, Yield: 96%, Melting point: 230-232°C.

IR (KBr): 3237, 3065, 2963, 1590, 1548, 1253, 760  $\text{cm}^{-1}$ .  $^1\text{H}$  NMR (DMSO- $\text{D}_6$ , 400 MHz):  $\delta$  11.48 (s, 1H), 9.44 (s, 1H), 6.79-6.92 (m, 5H), 4.68 (s, 1H), 2.19 (d,  $J = 16\text{Hz}$ , 1H), 2.13 (d,  $J = 16\text{Hz}$ , 1H), 1.85 (d,  $J = 16\text{Hz}$ , 1H), 1.68 (d,  $J = 16\text{Hz}$ , 1H), 1.65 (s, 3H), 0.76 (s, 3H), 0.69 (s,

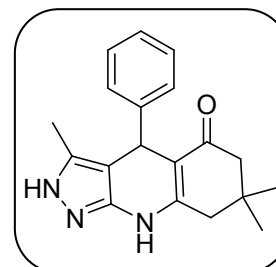

3H).  $^{13}\text{C}$  NMR (DMSO- $\text{D}_6$ , 100 MHz):  $\delta$  9.35, 26.82, 28.83, 31.87, 35.08, 40.96, 50.39, 103.91, 106.94, 125.11, 127.67, 134.79, 146.23, 148.39, 152.78, 192.78. ESI-MS:  $m/z$  308  $[\text{M}+\text{H}]^+$ .

**4-(4-methoxyphenyl)-3,7,7-trimethyl-6,7,8,9-tetrahydro-2H-pyrazolo[3,4-b]quinolin-5(4H)-one (6b):**

Pale Yellowish solid, Yield: 95%, Melting point: 295-297 $^\circ\text{C}$ .

IR (KBr): 3240, 3065, 2963, 1590, 1548, 1253, 760  $\text{cm}^{-1}$ .  $^1\text{H}$  NMR (DMSO- $\text{D}_6$ , 400 MHz):  $\delta$  11.71 (s, 1H), 9.65 (s, 1H), 6.99 (d,  $J = 8\text{Hz}$ , 2H), 6.71 (d,  $J = 8\text{Hz}$ , 2H), 4.86 (s, 1H), 2.41 (d,  $J = 16\text{Hz}$ , 1H), 2.34 (d,  $J = 16\text{Hz}$ , 1H), 2.07 (d,  $J = 16\text{Hz}$ , 1H), 1.89 (d,  $J = 16\text{Hz}$ , 1H), 1.88 (s, 3H), 0.98 (s, 3H), 0.92 (s, 3H).  $^{13}\text{C}$  NMR (DMSO- $\text{D}_6$ , 100 MHz):  $\delta$  9.33, 26.82, 28.85, 31.85, 34.09, 40.95, 50.43, 54.79, 104.15, 107.23, 112.99, 128.01, 134.7, 140.72, 146.26, 152.44, 156.79, 192.79. ESI-MS:  $m/z$  338  $[\text{M}+\text{H}]^+$ .

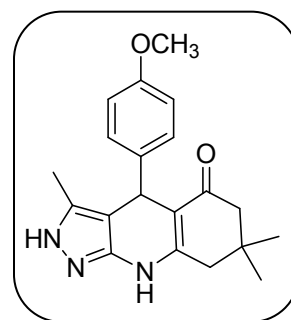

**3,7,7-trimethyl-4-(4-nitrophenyl)-6,7,8,9-tetrahydro-2H-pyrazolo[3,4-b]quinolin-5(4H)-one (6c):**

Yellow crystal, Yield: 98%, Melting point: 300-302 $^\circ\text{C}$ .

IR (KBr): 3262, 3068, 2952, 1593, 1547, 1255, 740  $\text{cm}^{-1}$ .  $^1\text{H}$  NMR (DMSO- $\text{D}_6$ , 400 MHz):  $\delta$  11.61 (s, 1H), 9.63 (s, 1H), 7.82 (d,  $J = 8\text{Hz}$ , 2H), 7.14 (d,  $J = 8\text{Hz}$ , 2H), 4.84 (s, 1H), 2.18-2.21 (m, 2H), 1.86 (d,  $J = 16\text{Hz}$ , 1H), 1.68 (d,  $J = 16\text{Hz}$ , 1H), 1.62 (s, 3H), 0.75 (s, 3H), 0.68 (s, 3H).  $^{13}\text{C}$  NMR (DMSO- $\text{D}_6$ , 100 MHz):  $\delta$  9.28, 26.89, 28.86, 31.90, 35.46, 40.92, 50.22, 102.51, 105.89, 123.19, 128.38, 135.39, 145.19, 146.05, 153.34, 155.89, 192.81. ESI-MS:  $m/z$  353  $[\text{M}+\text{H}]^+$ .

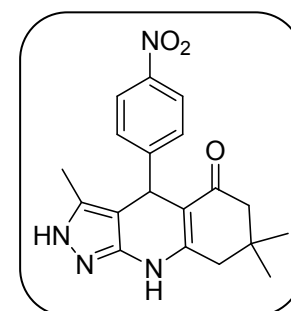

**3,7,7-trimethyl-4-(p-tolyl)-6,7,8,9-tetrahydro-2H-pyrazolo[3,4-b]quinolin-5(4H)-one (6d):**

Pale yellowish crystal, Yield: 94%, Melting point: 310-312 $^\circ\text{C}$ .

IR (KBr): 3234, 3070, 2961, 1590, 1547, 1254, 777  $\text{cm}^{-1}$ .  $^1\text{H}$  NMR (DMSO- $\text{D}_6$ , 400 MHz):  $\delta$  11.45 (s, 1H), 9.39 (s, 1H), 6.69-6.75 (m, 4H), 4.62 (s, 1H), 3.09 (s, 3H), 2.17 (d,  $J = 16\text{Hz}$ , 1H), 2.09 (d,  $J = 16\text{Hz}$ , 1H), 1.83 (d,  $J = 16\text{Hz}$ , 1H), 1.69 (d,  $J = 16\text{Hz}$ , 1H), 1.63 (s, 3H), 0.74 (s, 3H), 0.67 (s, 3H).  $^{13}\text{C}$  NMR (DMSO- $\text{D}_6$ , 100 MHz):  $\delta$  9.34, 20.49, 26.79, 28.88, 31.85, 34.59, 40.95, 50.41, 104.03, 107.09, 127.02, 128.23, 133.87, 134.71, 145.49, 146.24, 152.58, 192.75. ESI-MS:  $m/z$  322  $[\text{M}+\text{H}]^+$ .

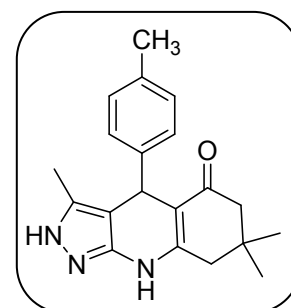

**3,7,7-trimethyl-4-(3-nitrophenyl)-6,7,8,9-tetrahydro-2H-pyrazolo[3,4-b]quinolin-5(4H)-one (6e):**

Yellow crystal, Yield: 93%, Melting point: 298-300 $^\circ\text{C}$ .

IR (KBr): 3210, 3065, 2958, 1588, 1547, 1257, 729  $\text{cm}^{-1}$ .  $^1\text{H}$  NMR (DMSO- $\text{D}_6$ , 400 MHz):  $\delta$  11.87 (s, 1H), 9.89 (s, 1H), 7.92 (d,  $J = 8\text{Hz}$ , 2H), 7.60 (s, 1H), 7.47 (d,  $J = 8\text{Hz}$ , 2H), 5.11 (s, 1H), 2.39-2.47 (m, 2H), 2.10 (d,  $J = 16\text{Hz}$ , 1H), 1.92 (d,  $J = 16\text{Hz}$ , 1H), 1.88 (s, 3H), 0.99 (s, 3H), 0.91 (s, 3H).  $^{13}\text{C}$  NMR (DMSO- $\text{D}_6$ , 100 MHz):  $\delta$  9.32, 26.66, 28.76, 31.93, 35.93, 40.89, 50.19, 102.72, 106.06, 120.40, 121.49, 129.25, 134.08, 135.39, 146.08, 147.46, 150.50, 153.37, 192.89. ESI-MS:  $m/z$  353  $[\text{M}+\text{H}]^+$ .

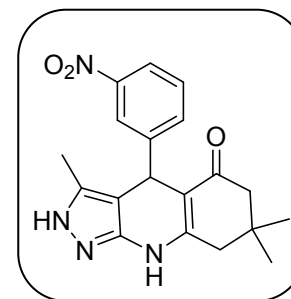

**4-(4-hydroxyphenyl)-3,7,7-trimethyl-6,7,8,9-tetrahydro-2H-pyrazolo[3,4-b]quinolin-5(4H)-one (6f):**

Light pinkish solid, Yield: 95%, Melting point: 272-275°C.

IR (KBr): 3256, 3067, 2961, 1588, 1546, 1253, 759  $\text{cm}^{-1}$ .  $^1\text{H}$  NMR (DMSO- $\text{D}_6$ , 400 MHz):  $\delta$  11.49 (s, 1H), 9.41 (s, 1H), 8.80 (s, 1H), 6.69 (d,  $J = 8\text{Hz}$ , 2H), 6.34 (d,  $J = 8\text{Hz}$ , 2H), 4.63 (s, 1H), 2.22 (d,  $J = 16.8\text{Hz}$ , 1H), 2.15 (d,  $J = 16.8\text{Hz}$ , 1H), 1.89 (d,  $J = 16\text{Hz}$ , 1H), 1.76 (d,  $J = 16\text{Hz}$ , 1H), 1.70 (s, 3H), 0.80 (s, 3H), 0.74 (s, 3H).  $^{13}\text{C}$  NMR (DMSO- $\text{D}_6$ , 100 MHz):  $\delta$  9.35, 26.81, 28.86, 31.84, 33.99, 40.97, 50.47, 104.39, 107.39, 114.37, 127.92, 134.61, 139.09, 146.28, 152.37, 154.73, 192.81. ESI-MS:  $m/z$  324  $[\text{M}+\text{H}]^+$ .

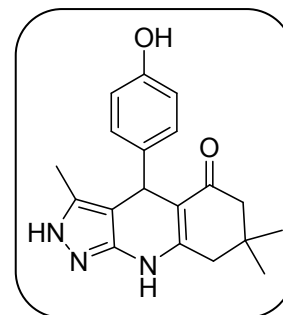

**4-(4-chlorophenyl)-3,7,7-trimethyl-6,7,8,9-tetrahydro-2H-pyrazolo[3,4-b]quinolin-5(4H)-one (6g):**

Colourless crystal, Yield: 97%, Melting point: 305-307°C.

IR (KBr): 3257, 3070, 2962, 1590, 1547, 1254, 785  $\text{cm}^{-1}$ .  $^1\text{H}$  NMR (DMSO- $\text{D}_6$ , 400 MHz):  $\delta$  11.79 (s, 1H), 9.76 (s, 1H), 7.21 (d,  $J = 8\text{Hz}$ , 2H), 7.11 (d,  $J = 8\text{Hz}$ , 2H), 4.92 (s, 1H), 2.43 (d,  $J = 16.8\text{Hz}$ , 1H), 2.35 (d,  $J = 16.8\text{Hz}$ , 1H), 2.08 (d,  $J = 16\text{Hz}$ , 1H), 1.91 (d,  $J = 16\text{Hz}$ , 1H), 1.87 (s, 3H), 0.98 (s, 3H), 0.91 (s, 3H).  $^{13}\text{C}$  NMR (DMSO- $\text{D}_6$ , 100 MHz):  $\delta$  9.30, 26.64, 28.75, 31.87, 34.61, 40.92, 50.33, 103.35, 106.57, 127.62, 128.99, 129.55, 134.99, 146.16, 147.31, 152.88, 192.81. ESI-MS:  $m/z$  342  $[\text{M}+\text{H}]^+$ .

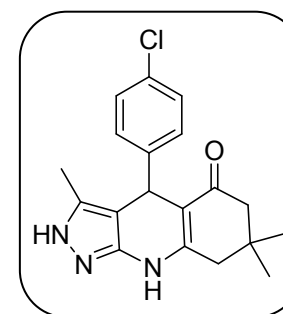

**4-(4-fluorophenyl)-3,7,7-trimethyl-6,7,8,9-tetrahydro-2H-pyrazolo[3,4-b]quinolin-5(4H)-one (6h):**

Colourless crystal, Yield: 96%, Melting point: 338-340°C.

IR (KBr): 3243, 3068, 2959, 1587, 1546, 1253, 791  $\text{cm}^{-1}$ .  $^1\text{H}$  NMR (DMSO- $\text{D}_6$ , 400 MHz):  $\delta$  11.77 (s, 1H), 9.73 (s, 1H), 6.98-7.12 (m, 4H), 4.93 (s, 1H), 2.42 (d,  $J = 16\text{Hz}$ , 1H), 2.35 (d,  $J = 8\text{Hz}$ , 1H), 2.08 (d,  $J = 16\text{Hz}$ , 1H), 1.91 (d,  $J = 8\text{Hz}$ , 1H), 1.87 (s, 3H), 0.98 (s, 3H), 0.91 (s, 3H).  $^{13}\text{C}$  NMR (DMSO- $\text{D}_6$ , 100 MHz):  $\delta$  9.29, 26.83, 28.75, 31.87, 34.35, 40.93, 50.35, 103.68, 106.85, 114.36, 128.79, 134.89, 144.57, 146.19, 152.74, 161.20, 192.83. ESI-MS:  $m/z$  326  $[\text{M}+\text{H}]^+$ .

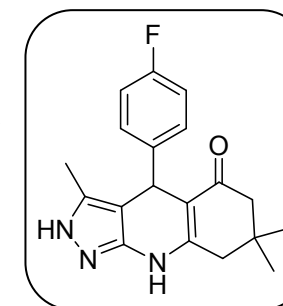

**4-(4-bromophenyl)-3,7,7-trimethyl-6,7,8,9-tetrahydro-2H-pyrazolo[3,4-b]quinolin-5(4H)-one (6i):**

Colourless crystal, Yield: 96%, Melting point: 315-317°C.

IR (KBr): 3237, 3070, 2959, 1589, 1547, 1253, 784  $\text{cm}^{-1}$ .  $^1\text{H}$  NMR (DMSO- $\text{D}_6$ , 400 MHz):  $\delta$  11.74 (s, 1H), 9.71 (s, 1H), 7.30 (d,  $J = 8\text{Hz}$ , 2H), 7.02 (d,  $J = 8\text{Hz}$ , 2H), 4.86 (s, 1H), 2.38 (d,  $J = 17.2\text{Hz}$ , 1H), 2.31 (d,  $J = 17.2\text{Hz}$ , 1H), 2.04 (d,  $J = 16\text{Hz}$ , 1H), 1.87 (d,  $J = 16\text{Hz}$ , 1H), 1.83 (s, 3H), 0.94 (s, 3H), 0.87 (s, 3H).  $^{13}\text{C}$  NMR (DMSO- $\text{D}_6$ , 100 MHz):  $\delta$  9.33, 26.84, 28.75, 31.88, 34.69, 40.91, 50.31, 103.27, 106.52, 118.04, 129.43, 130.54, 135.08, 146.07, 147.72, 152.92, 192.83. ESI-MS:  $m/z$  386  $[\text{M}]^+$ , 389  $[\text{M}+2]^+$ .

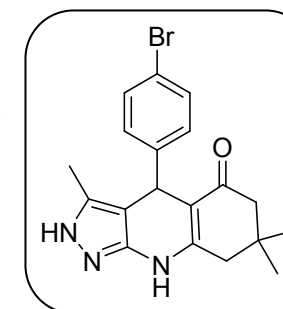



**3,7,7-trimethyl-4-(2-nitrophenyl)-6,7,8,9-tetrahydro-2H-pyrazolo[3,4-b]quinolin-5(4H)-one (6j):**

Yellow solid, Yield: 91%, Melting point: 262-265 °C.

IR (KBr): 3263, 3061, 2958, 1590, 1549, 1258, 734  $\text{cm}^{-1}$ .  $^1\text{H}$  NMR (DMSO- $\text{D}_6$ , 400 MHz):  $\delta$  11.93 (s, 1H), 9.89 (s, 1H), 7.67 (d,  $J = 8\text{Hz}$ , 1H), 7.46 (t,  $J = 8\text{Hz}$ , 1H), 7.23 (t,  $J = 8\text{Hz}$ , 1H), 7.09 (d,  $J = 8\text{Hz}$ , 1H), 5.54 (s, 1H), 2.41 (d,  $J = 16\text{Hz}$ , 1H), 2.29 (d,  $J = 16\text{Hz}$ , 1H), 2.01 (d,  $J = 16\text{Hz}$ , 1H), 1.93 (s, 3H), 1.79 (d,  $J = 16\text{Hz}$ , 1H), 0.95 (s, 3H), 0.79 (s, 3H).  $^{13}\text{C}$  NMR (DMSO- $\text{D}_6$ , 100 MHz):  $\delta$  9.37, 26.52, 28.67, 29.66, 31.94, 40.69, 49.81, 102.23, 107.04, 122.55, 126.21, 131.04, 132.59, 136.33, 140.70, 142.29, 148.21, 152.59, 192.78. ESI-MS:  $m/z$  353[M+H] $^+$ .

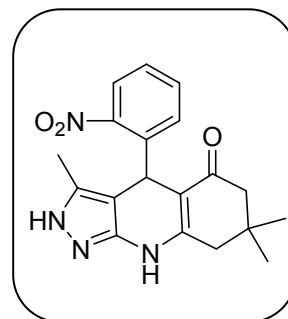

5a

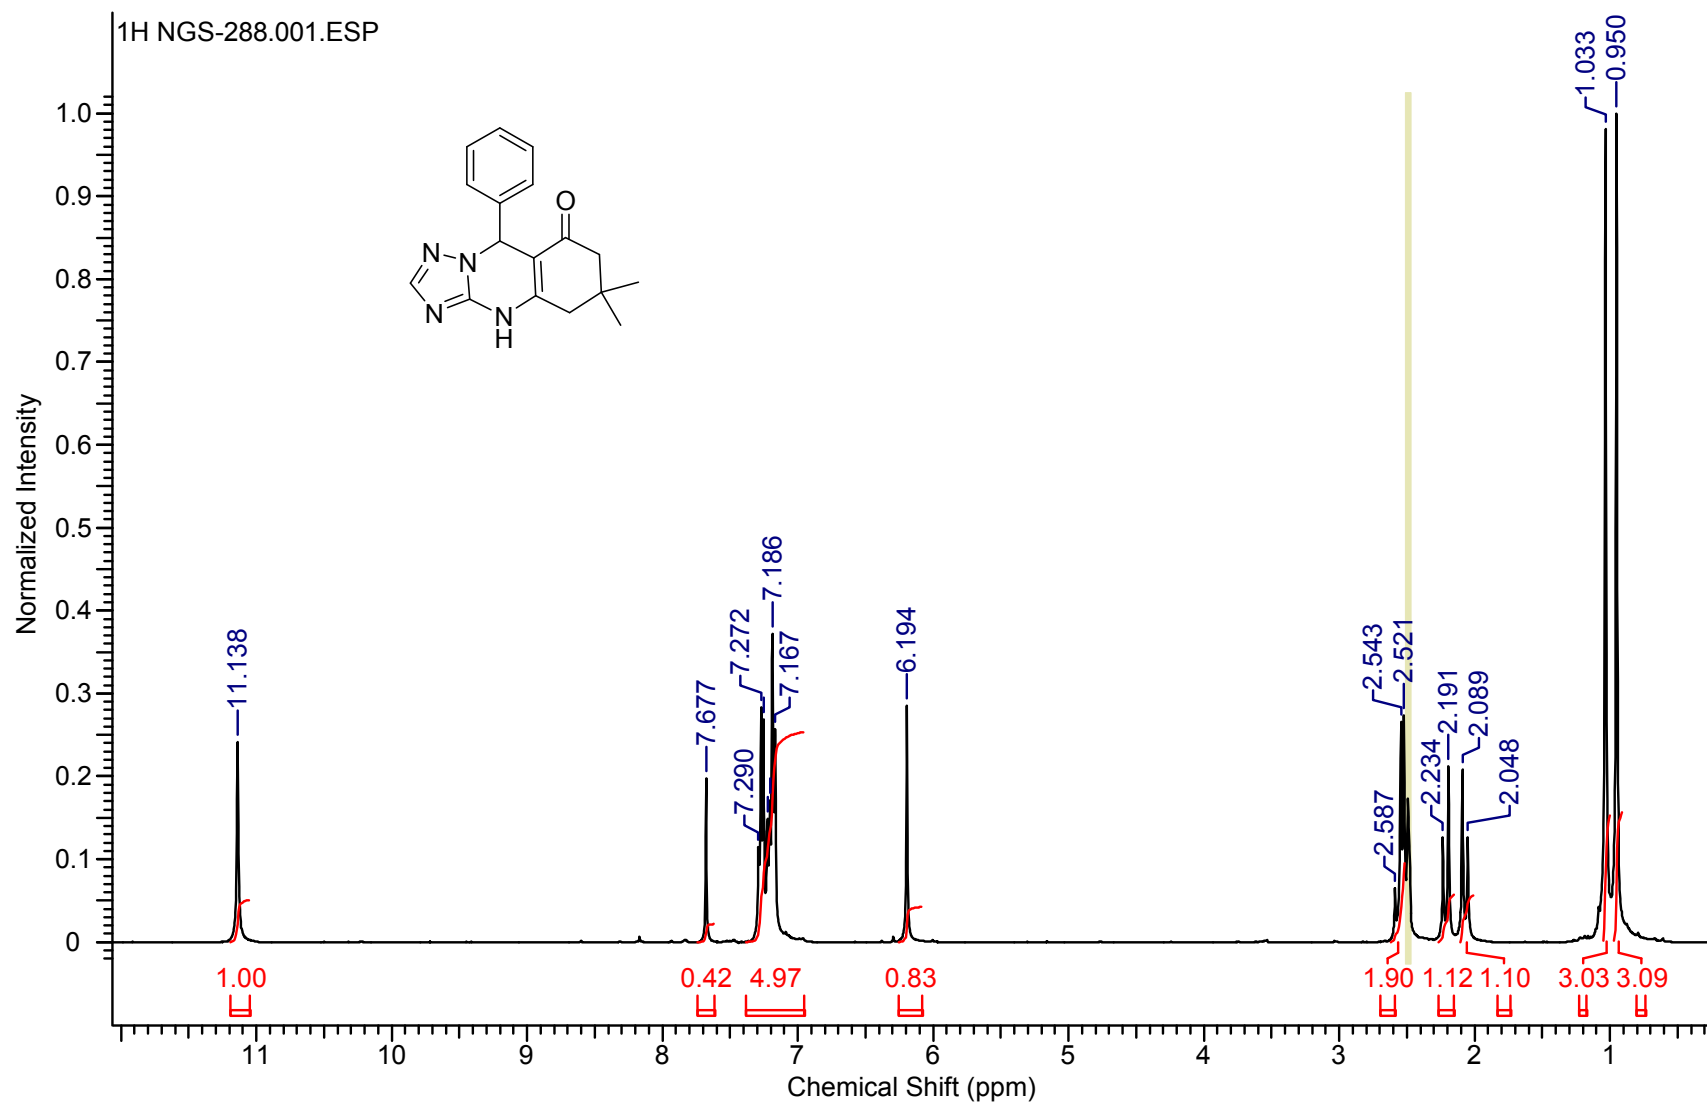

5a

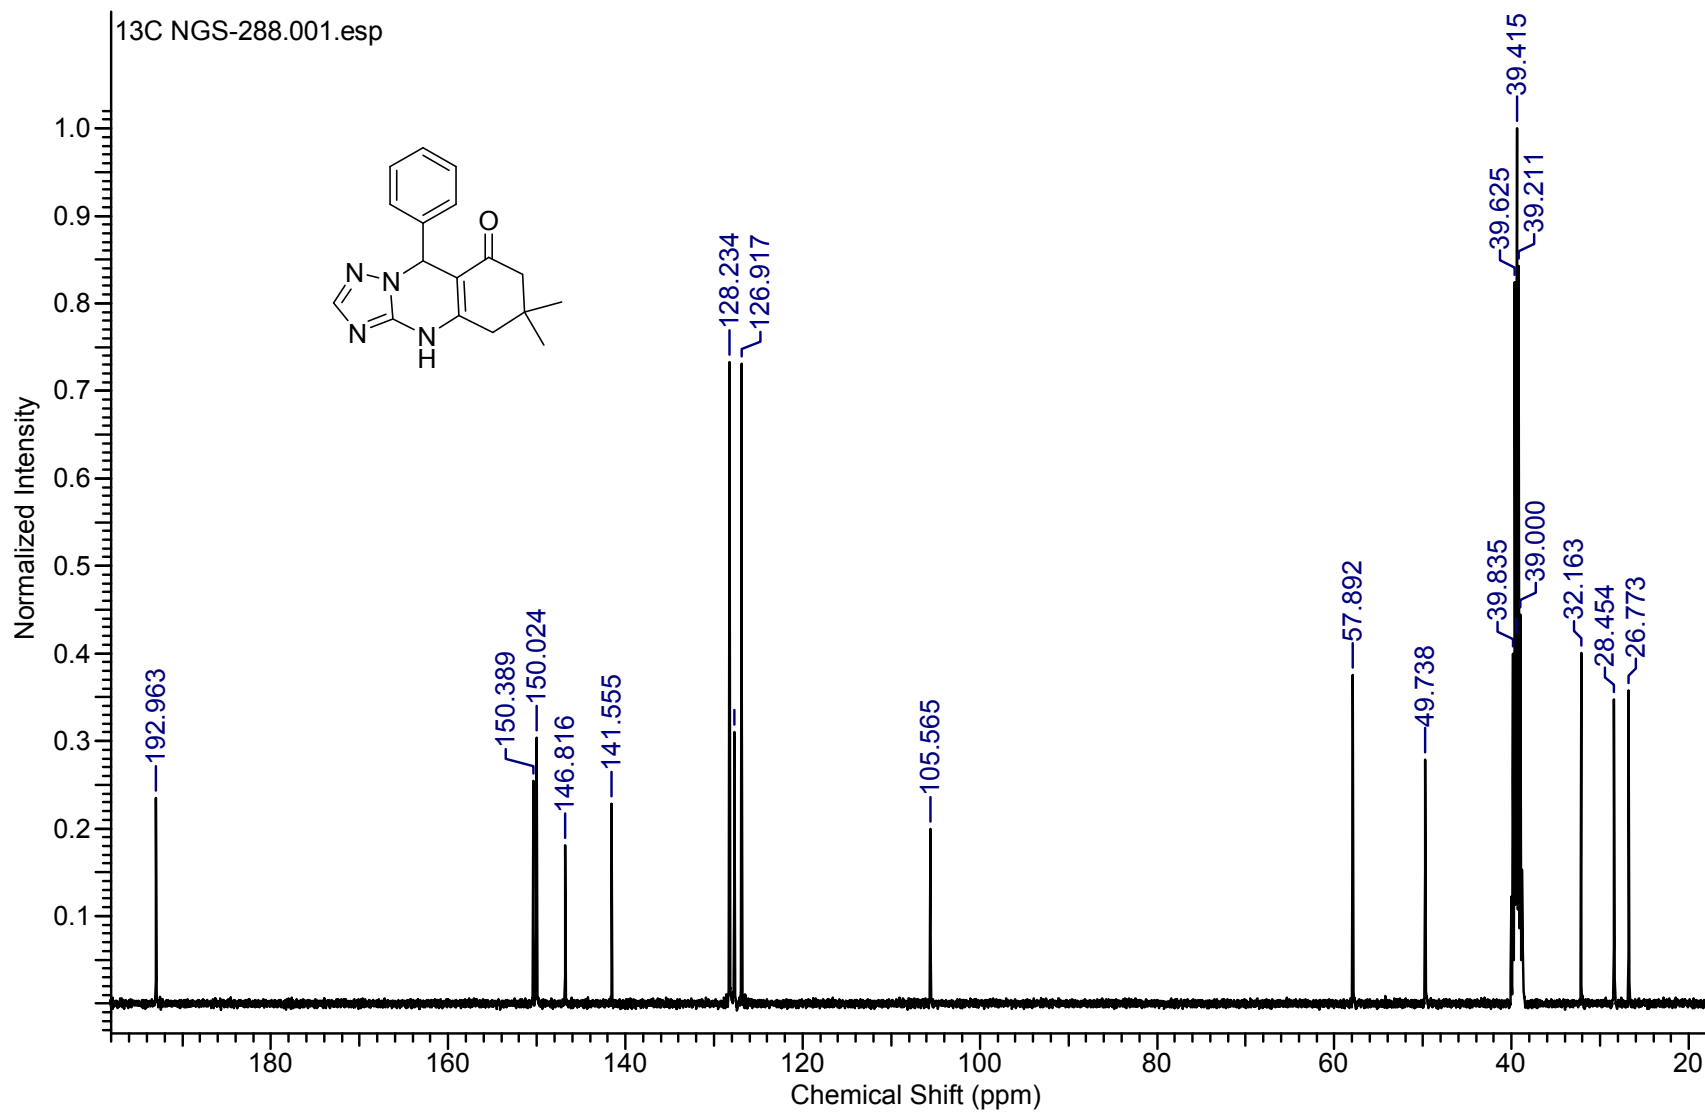

5b

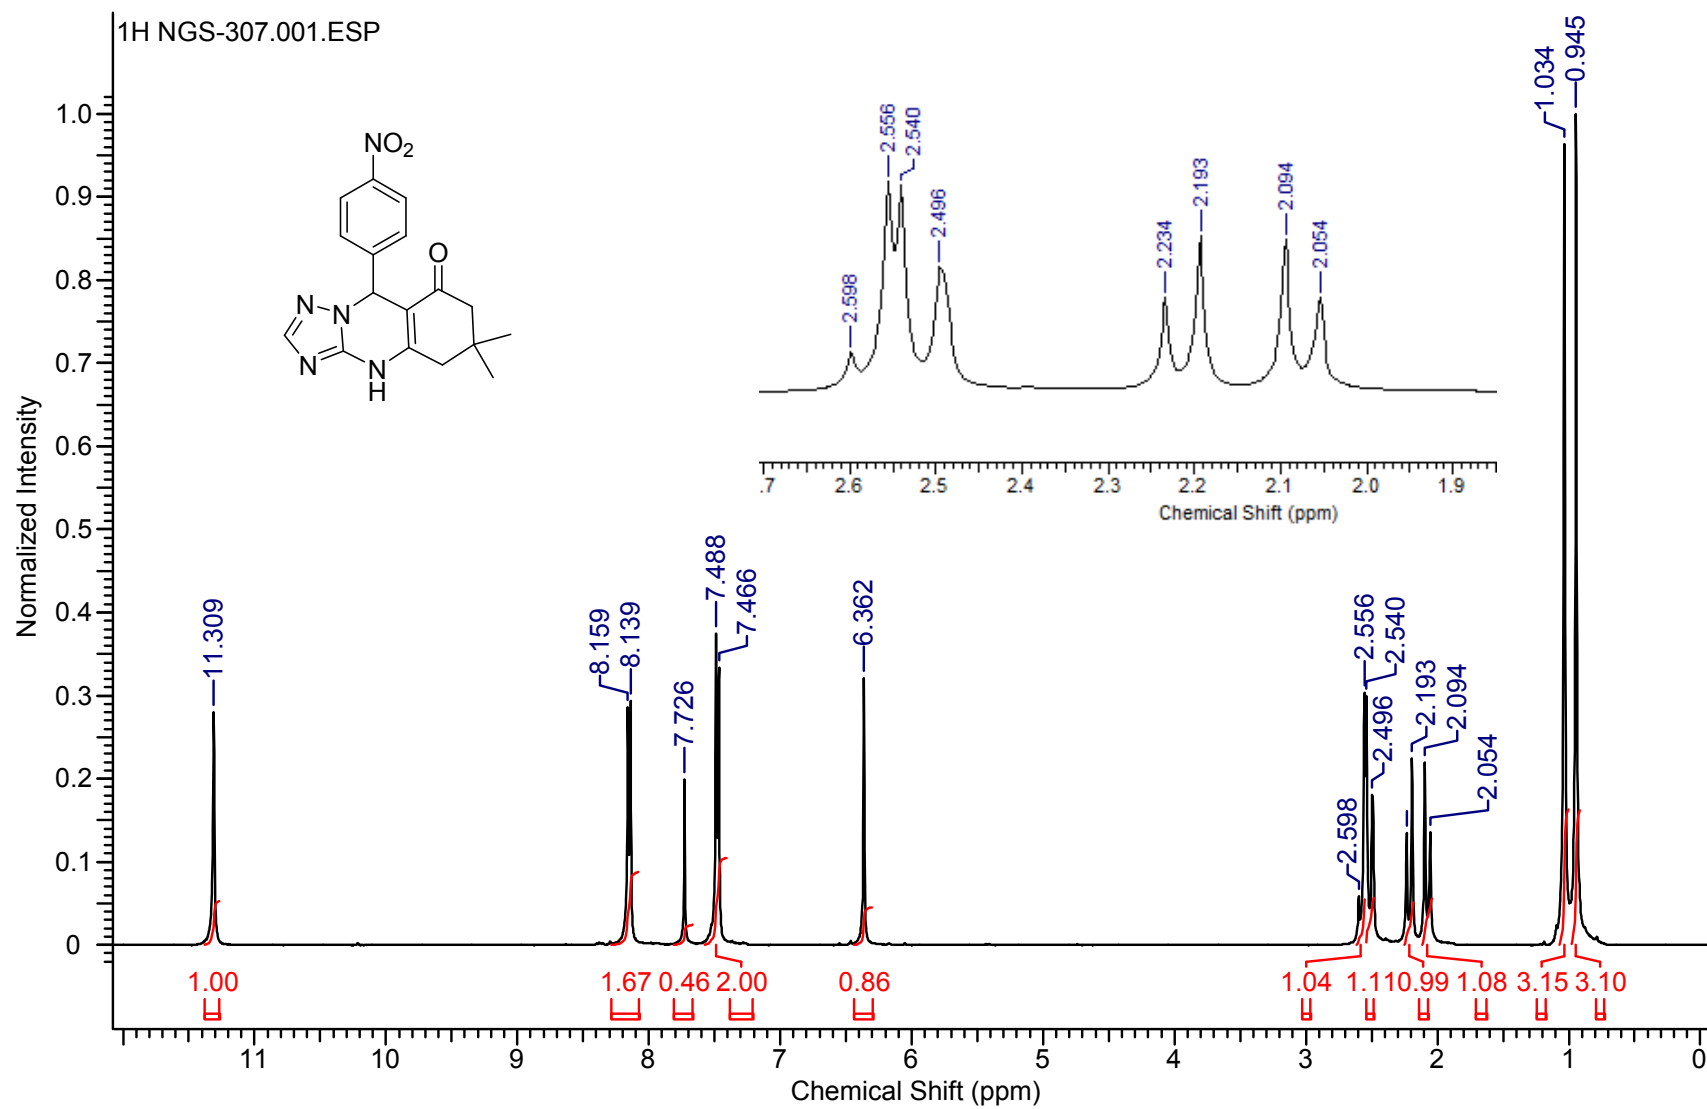

5b

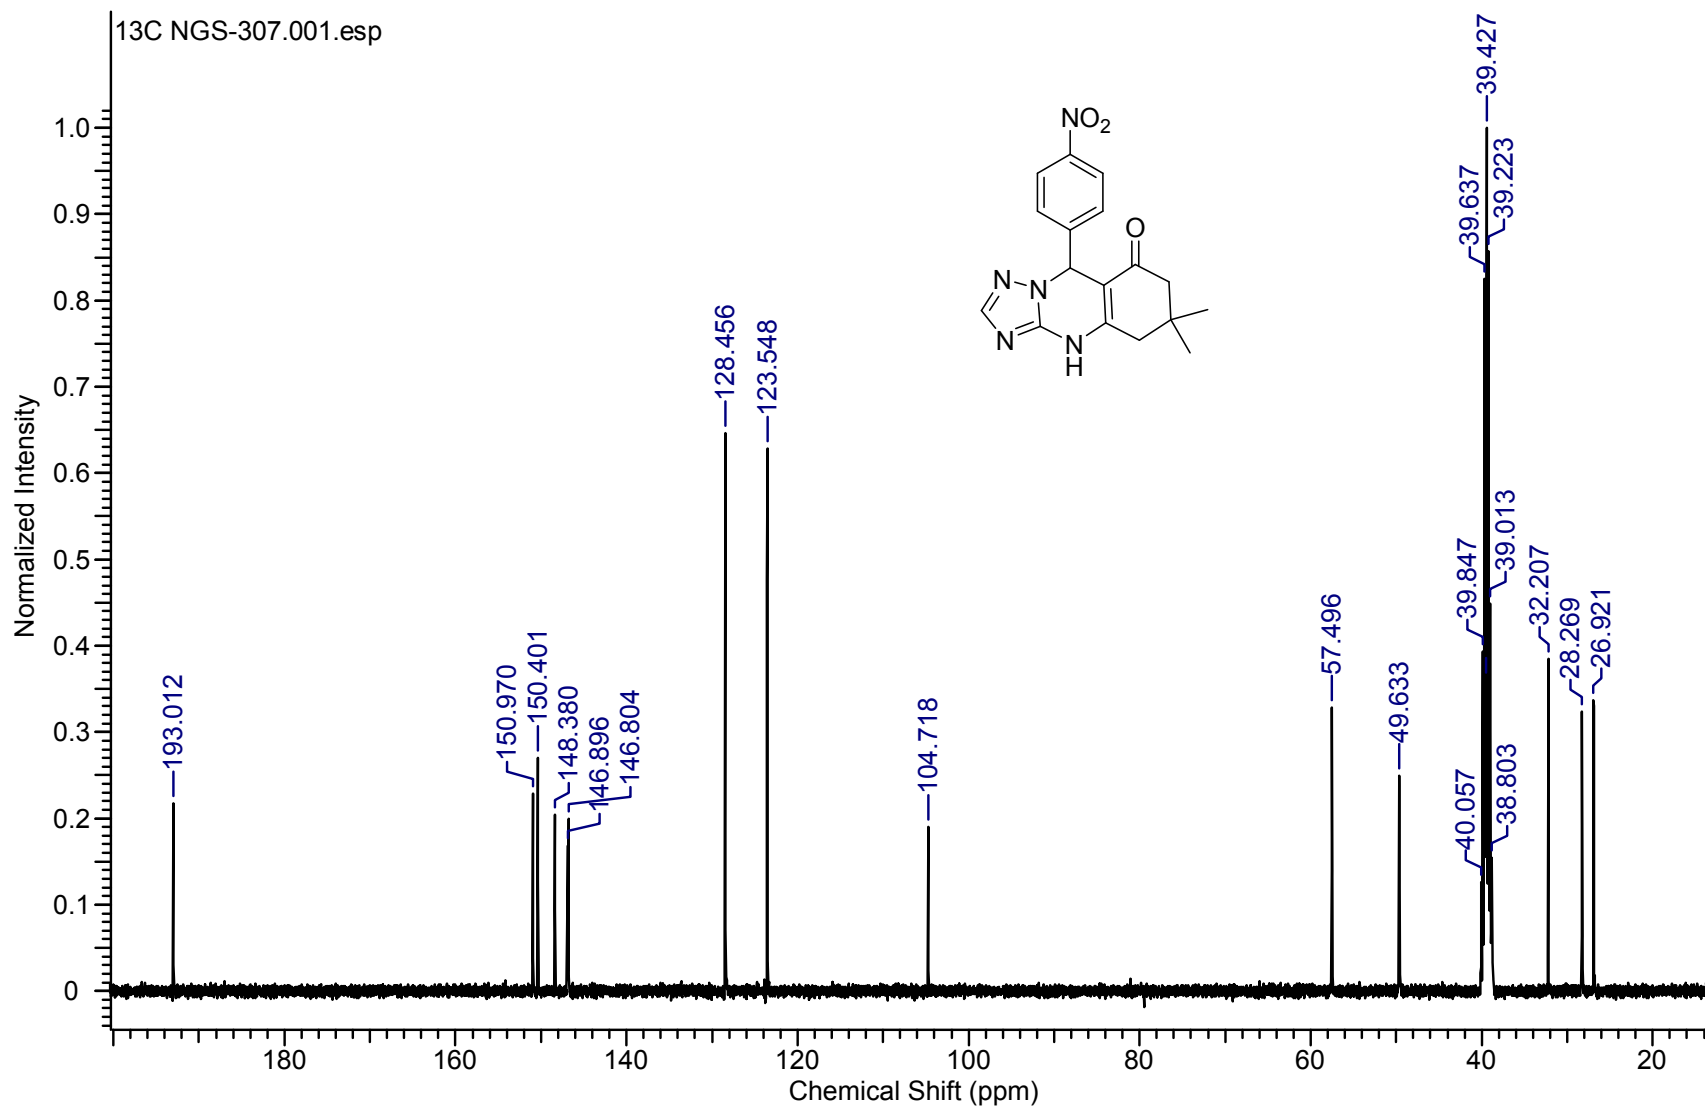

5c

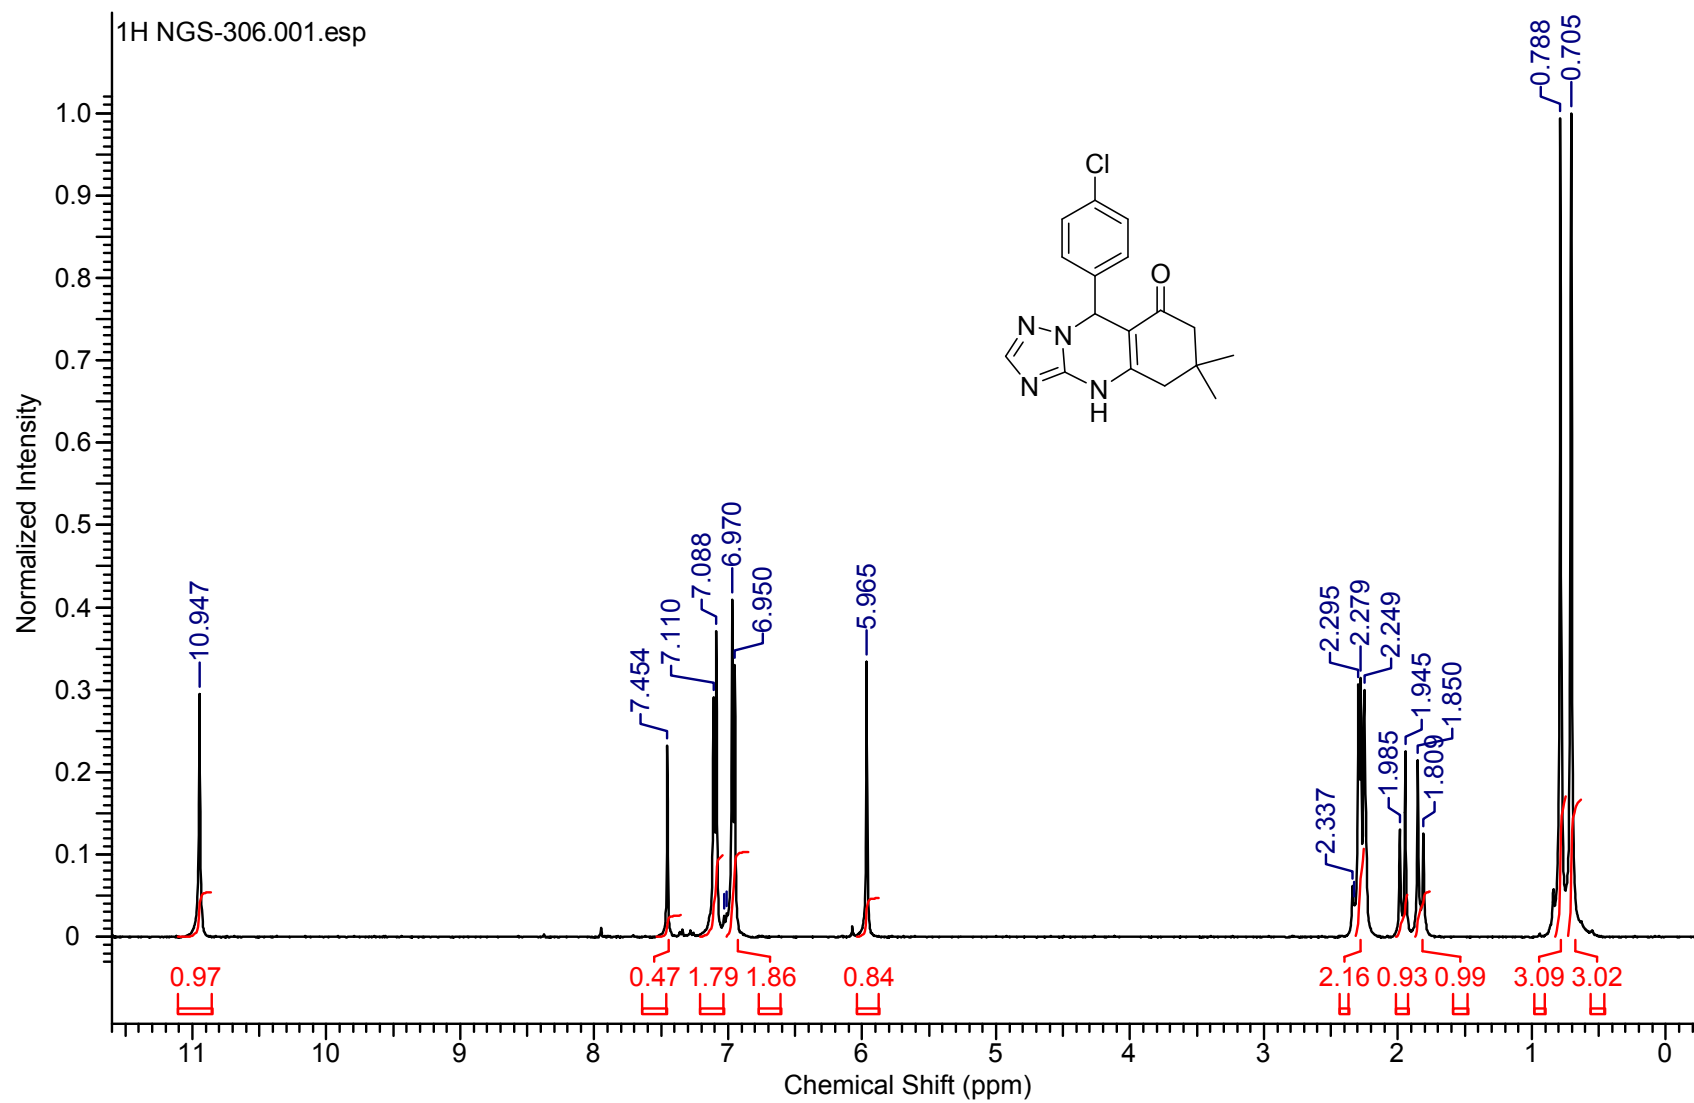

5c

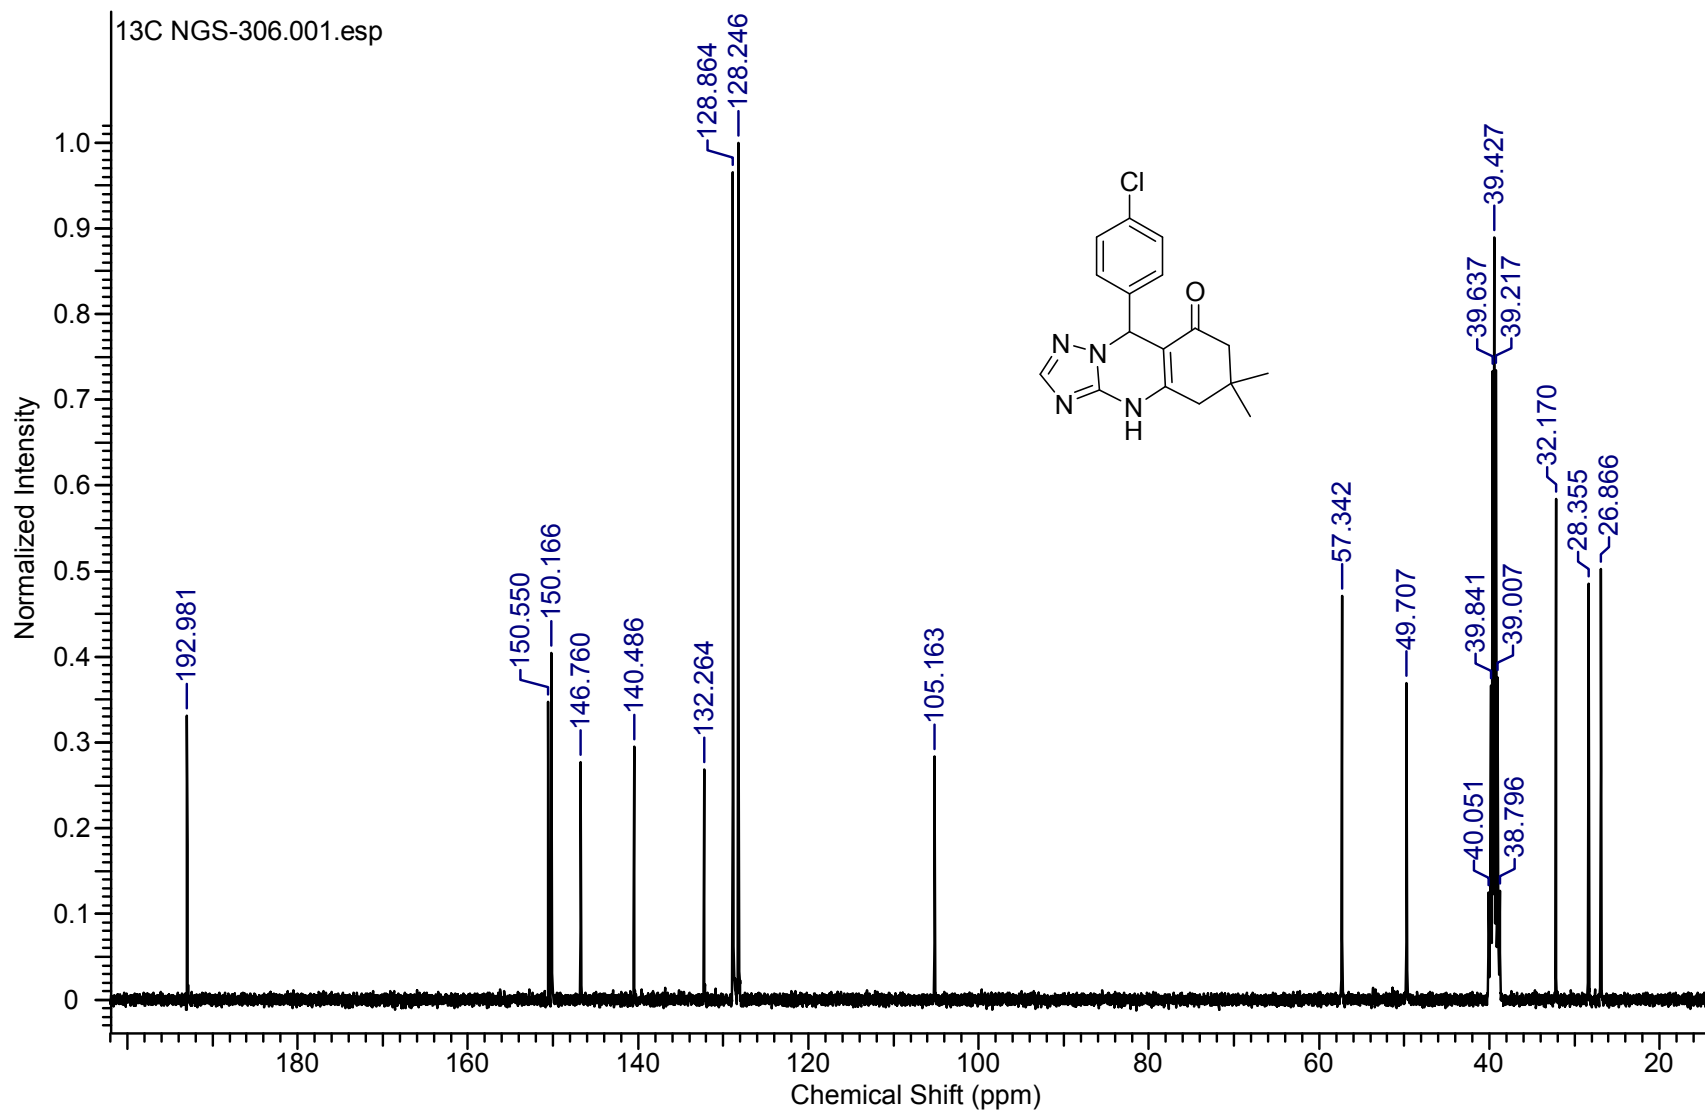

5d

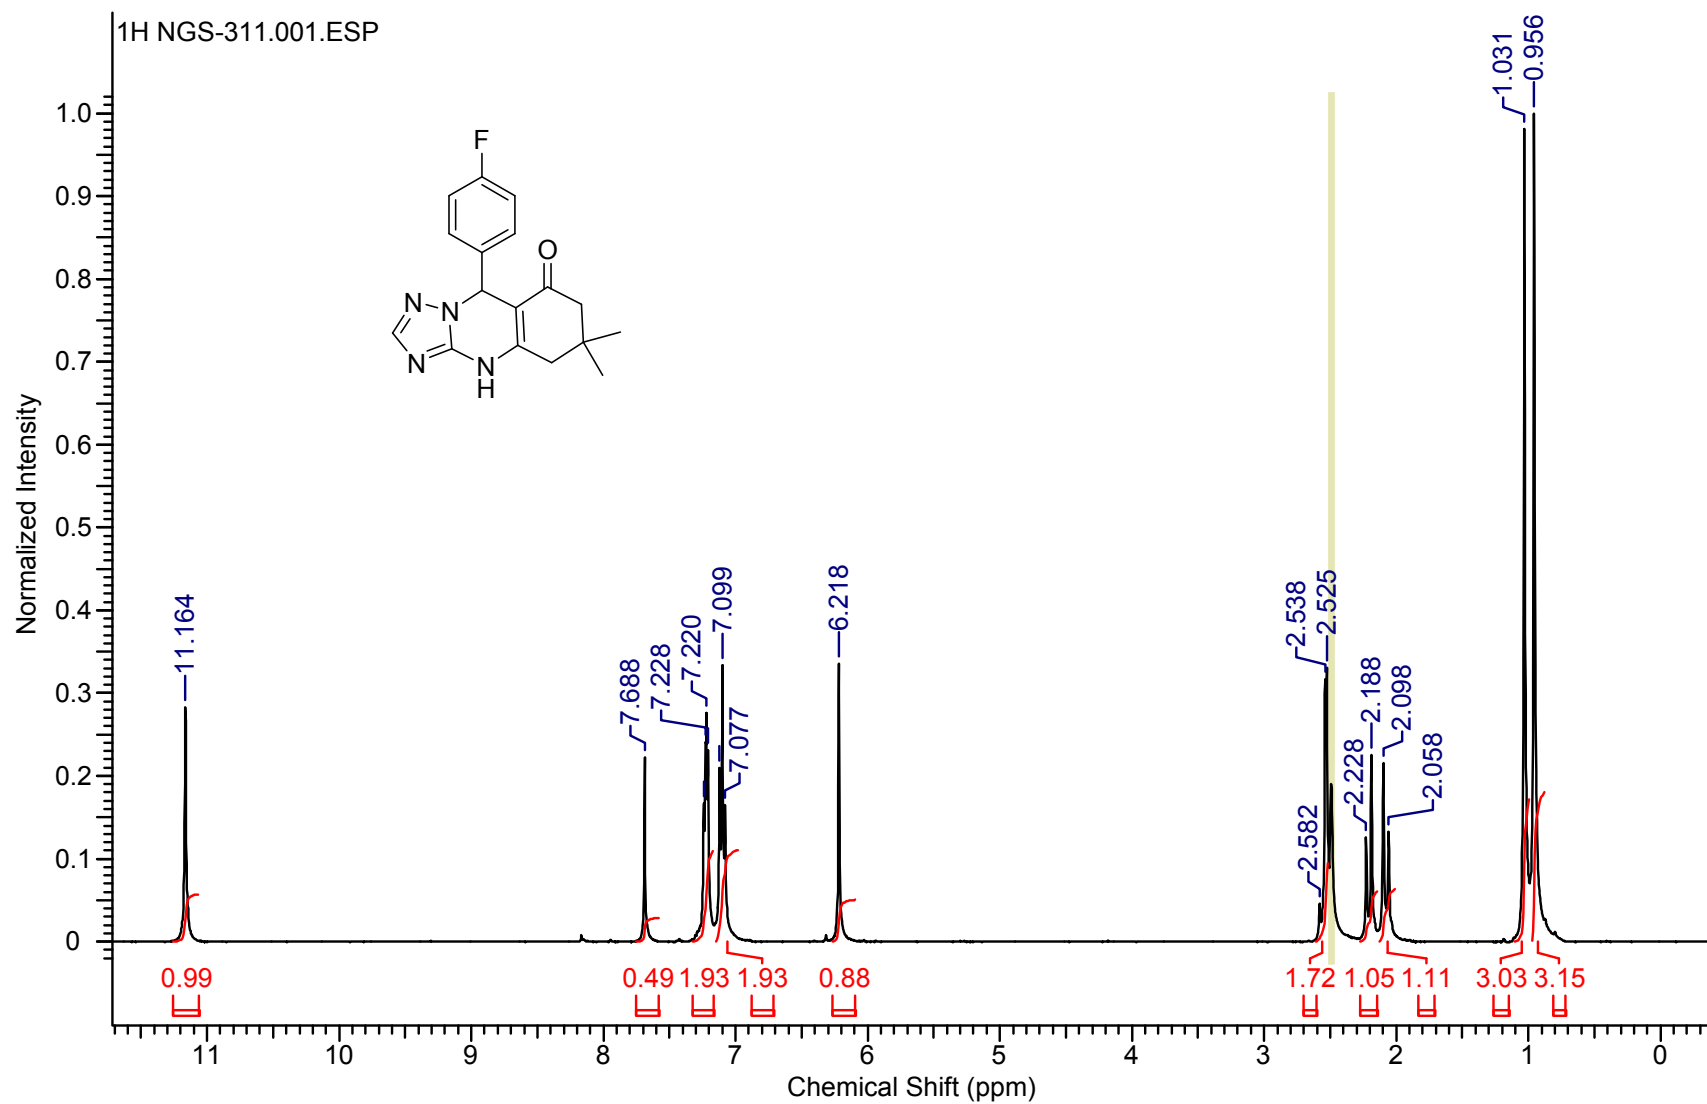



5d

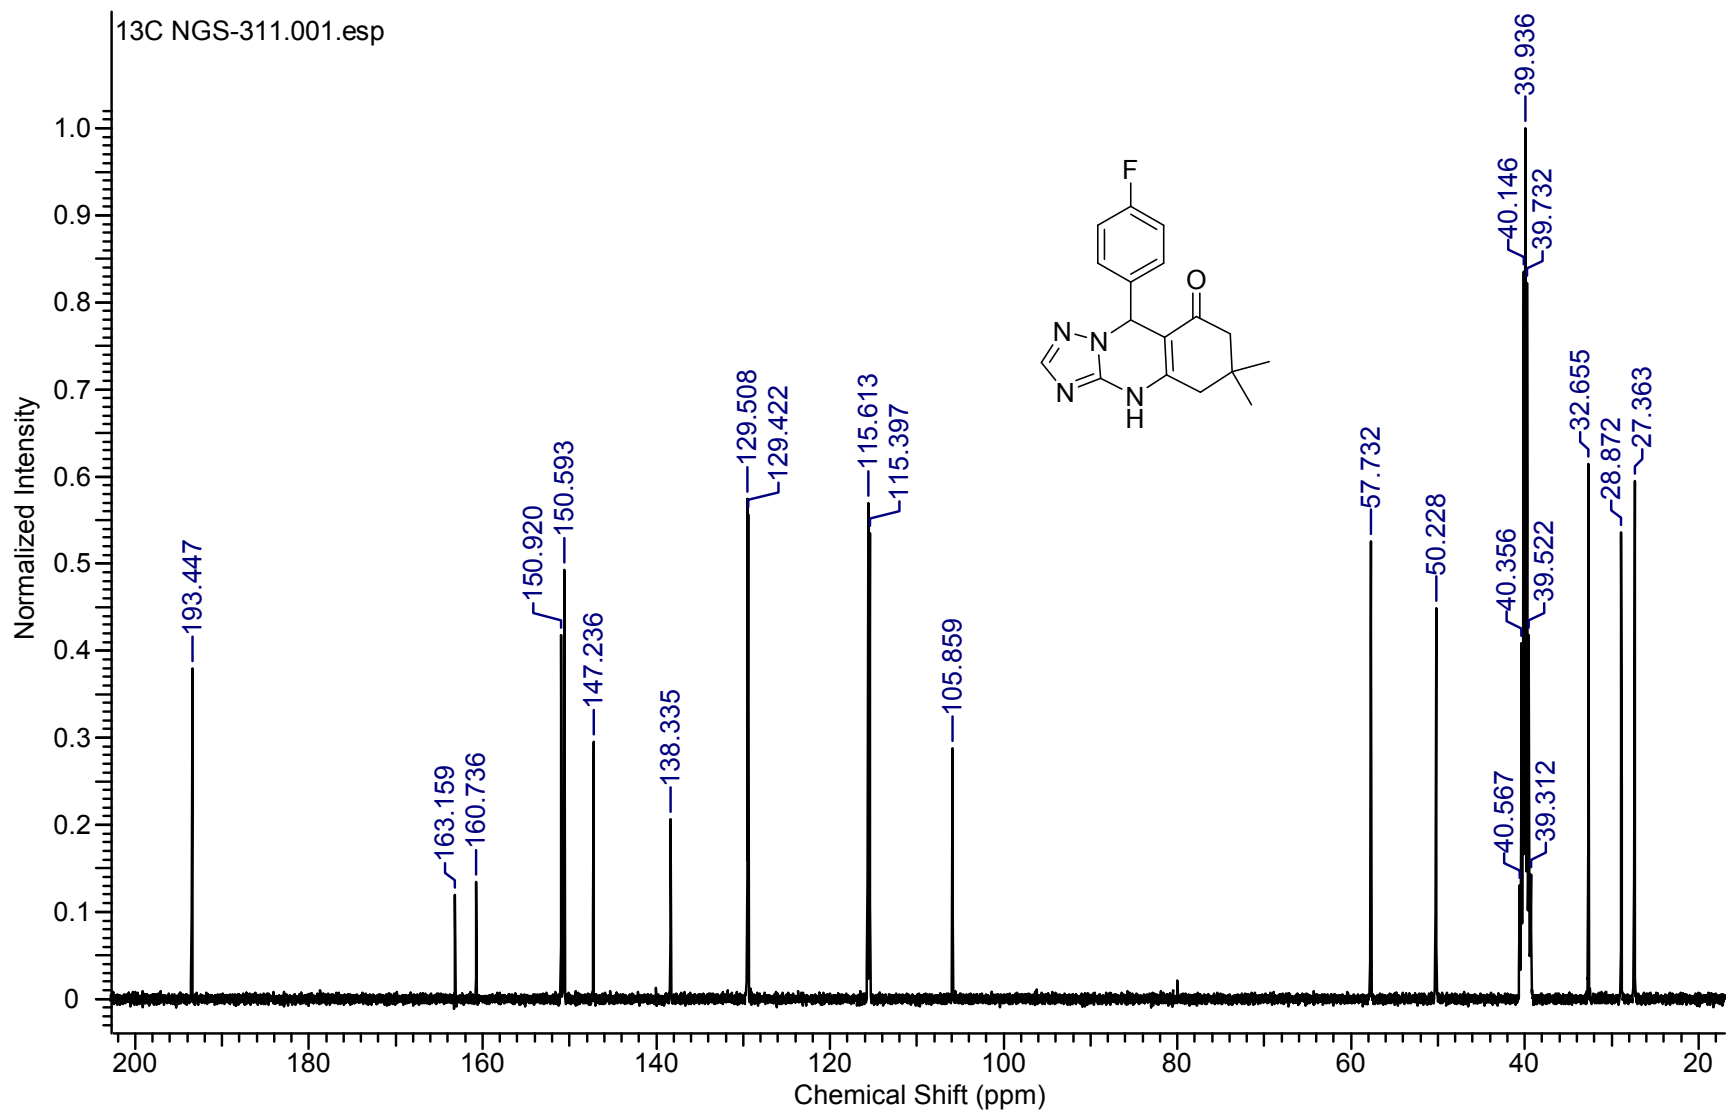

5e

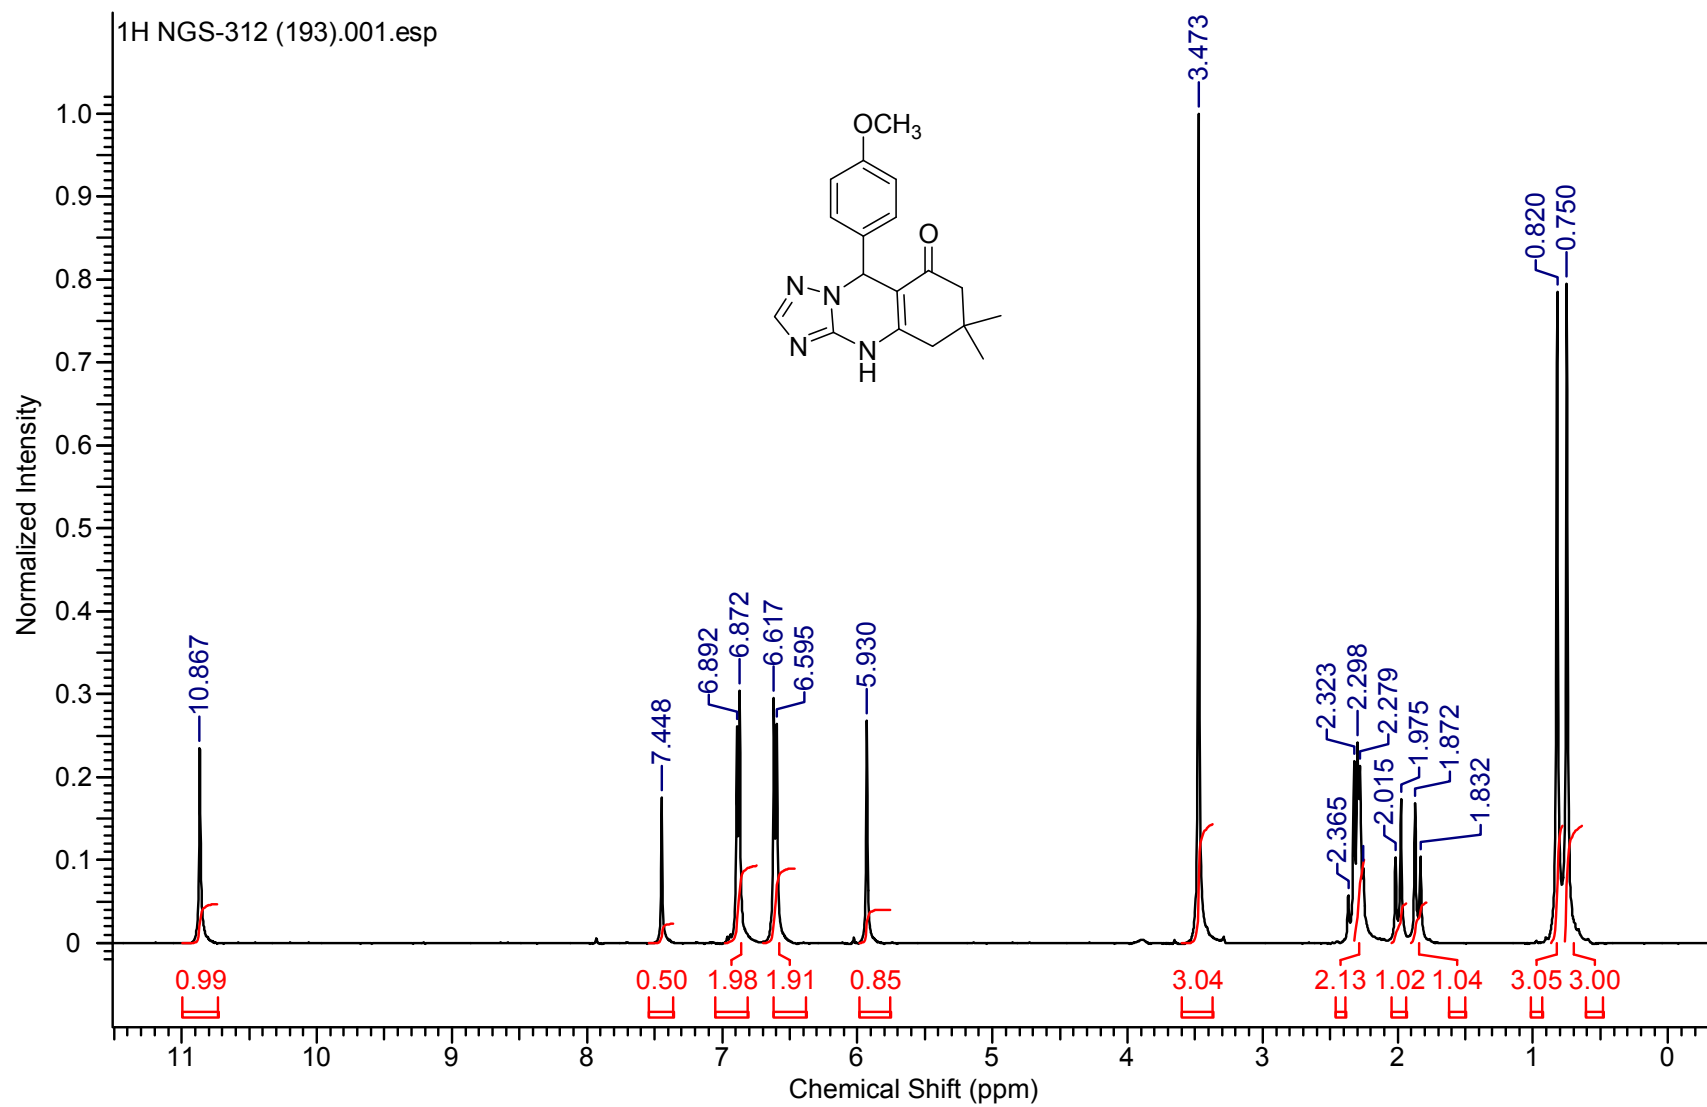

5e

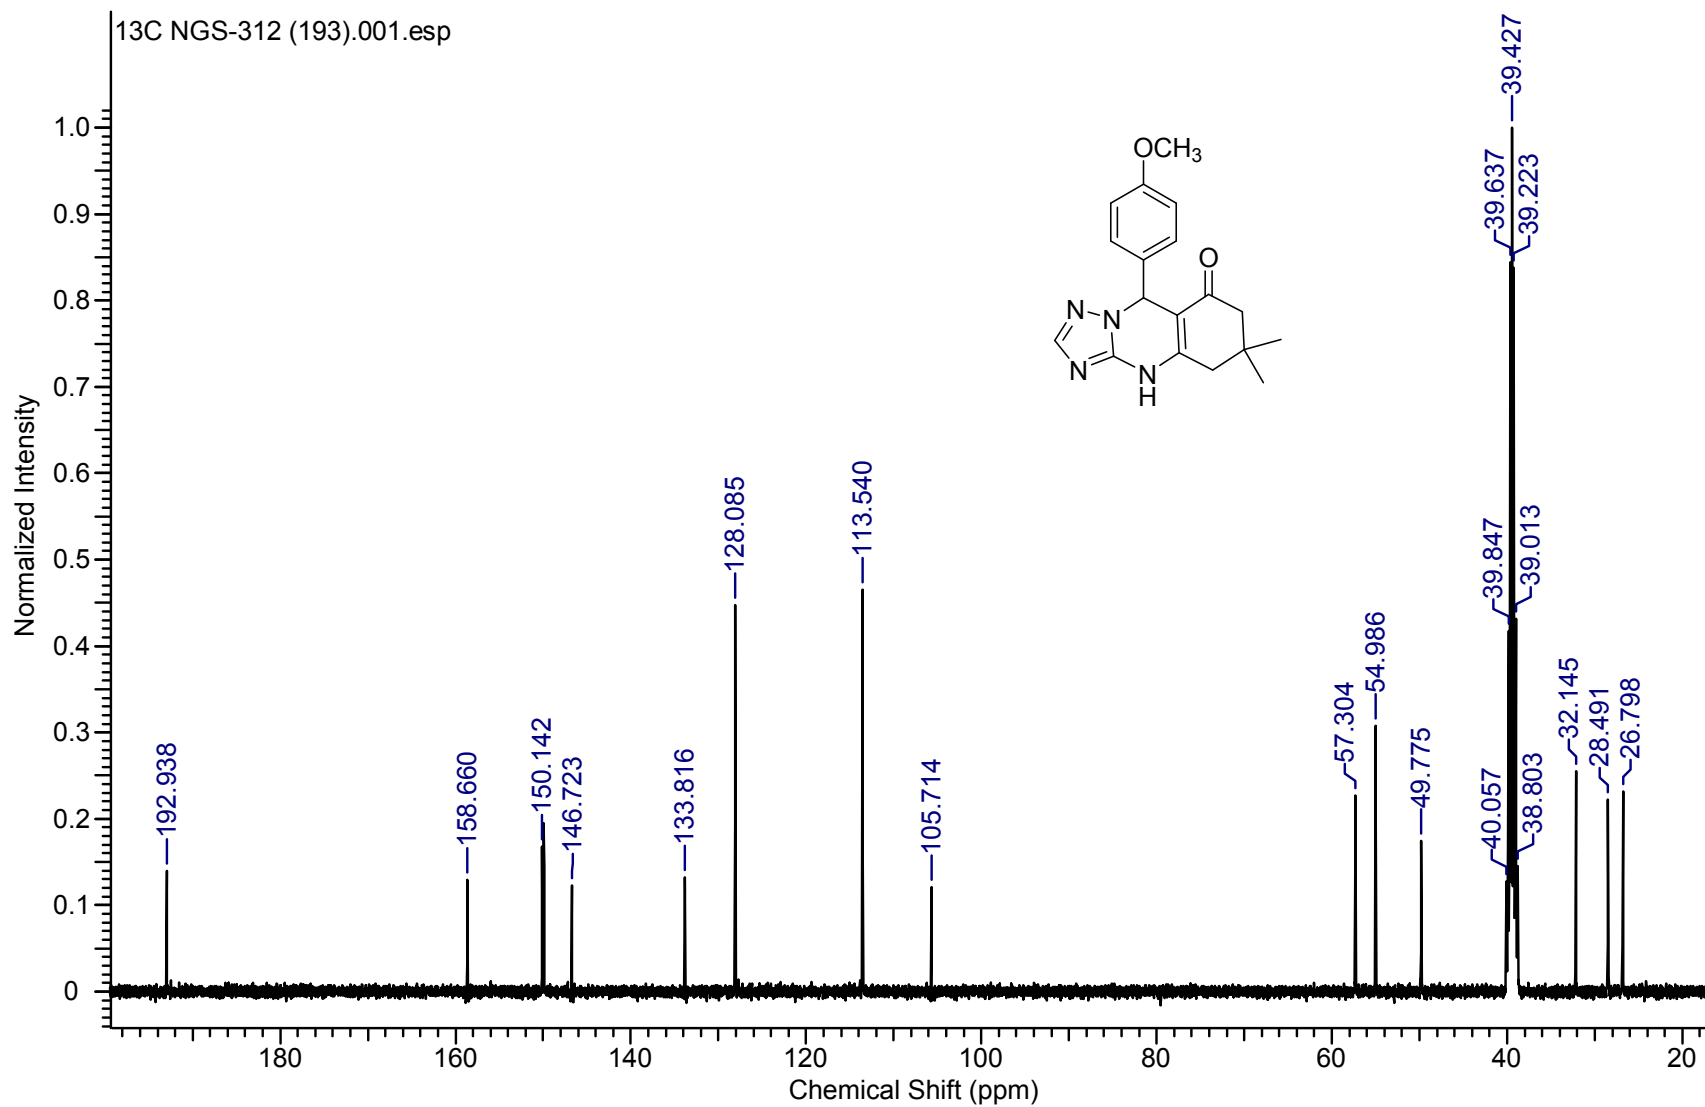

5f

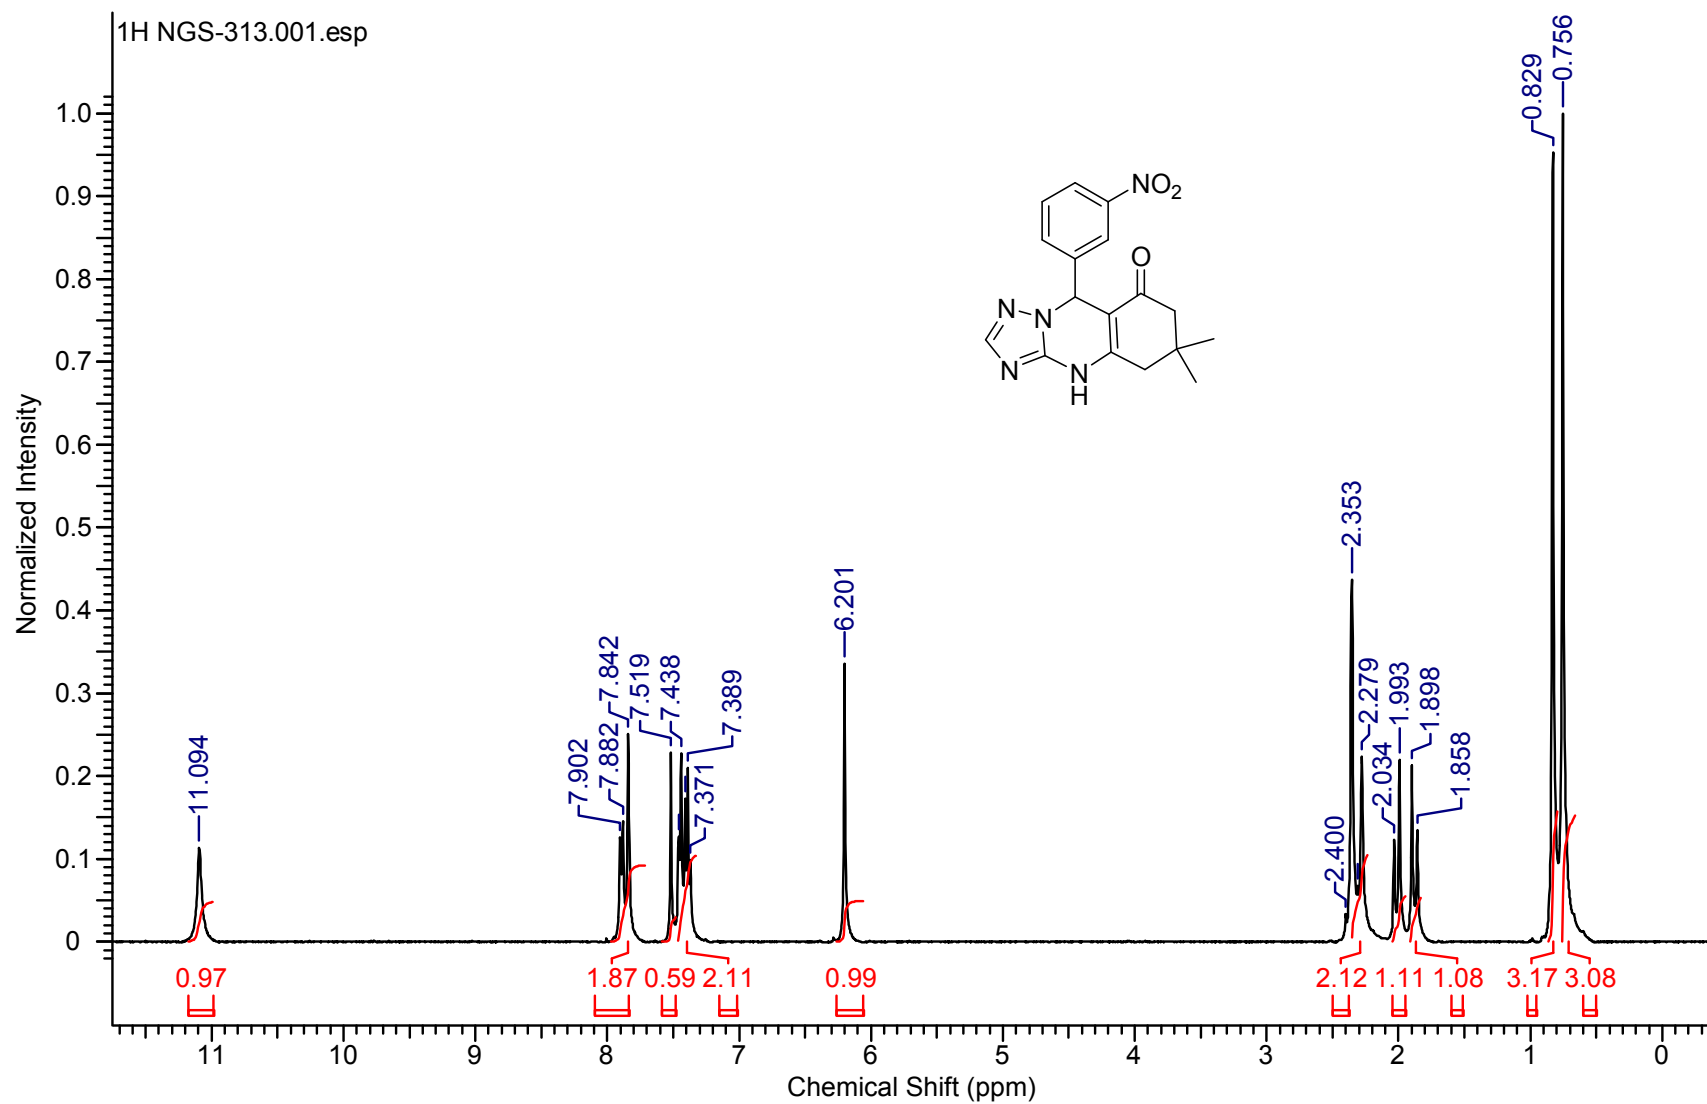

5f

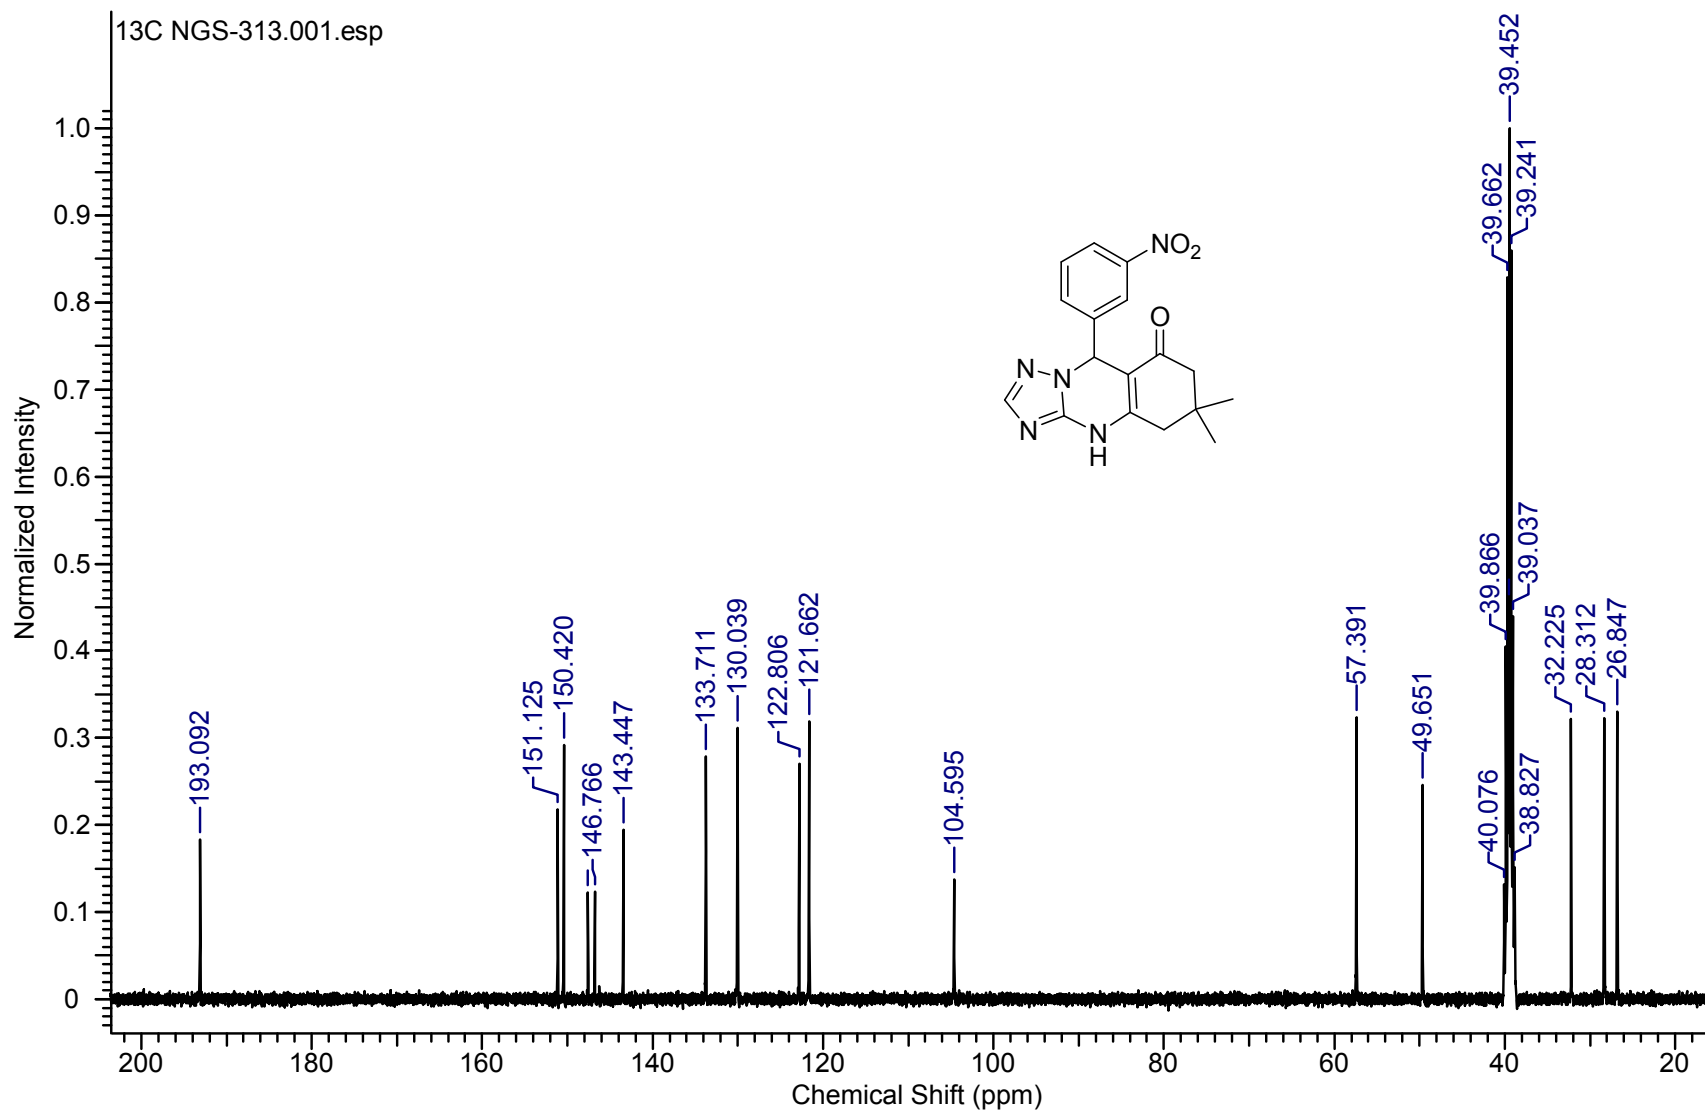

5g

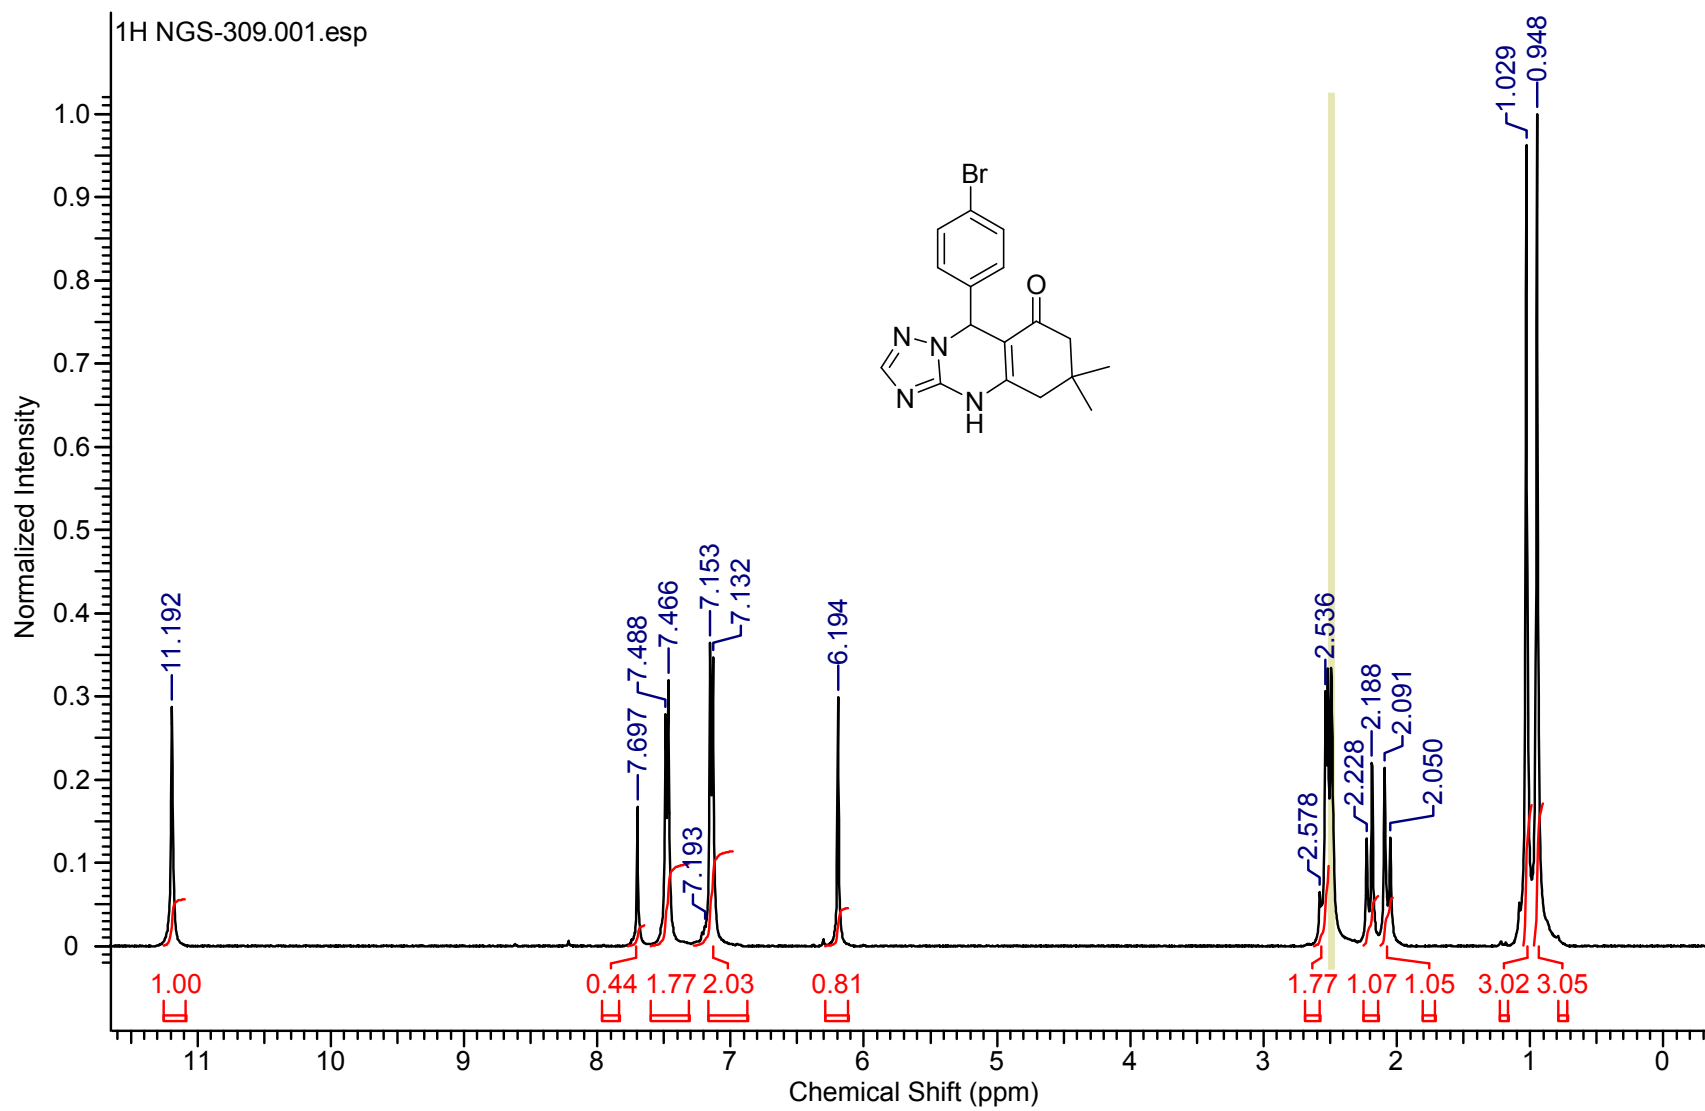

5g

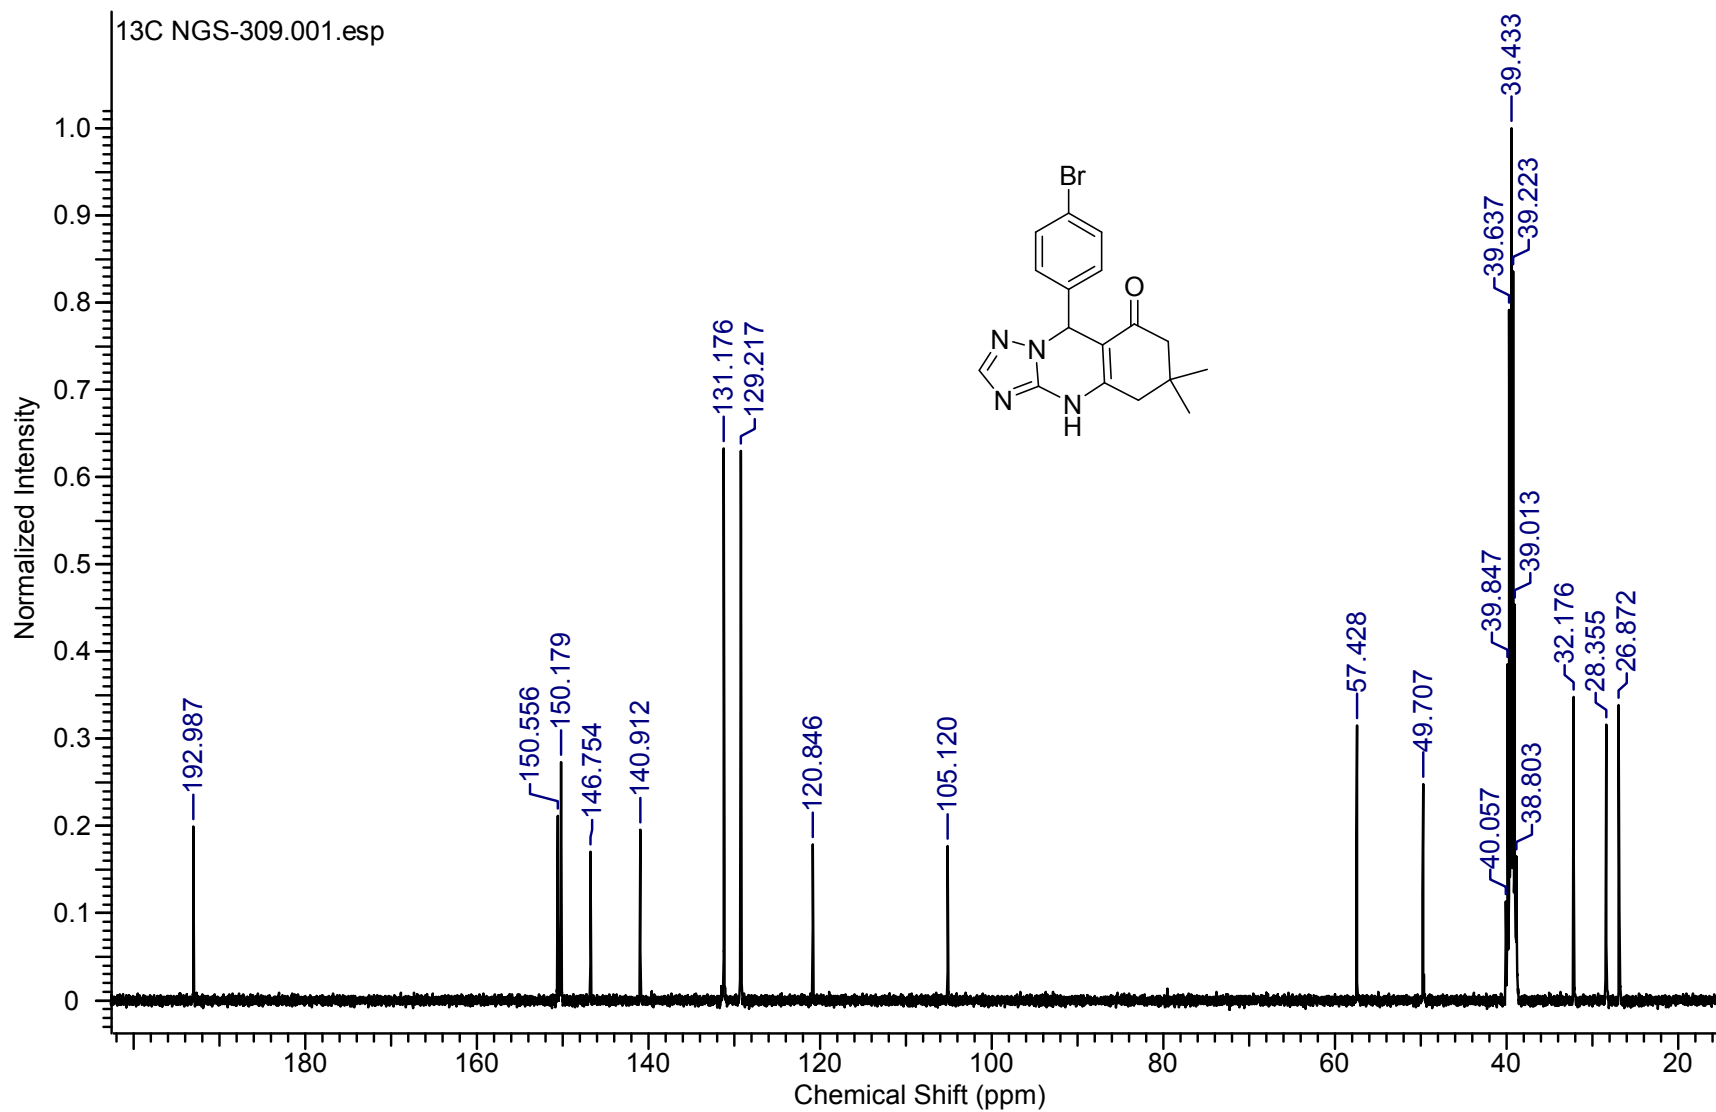

5h

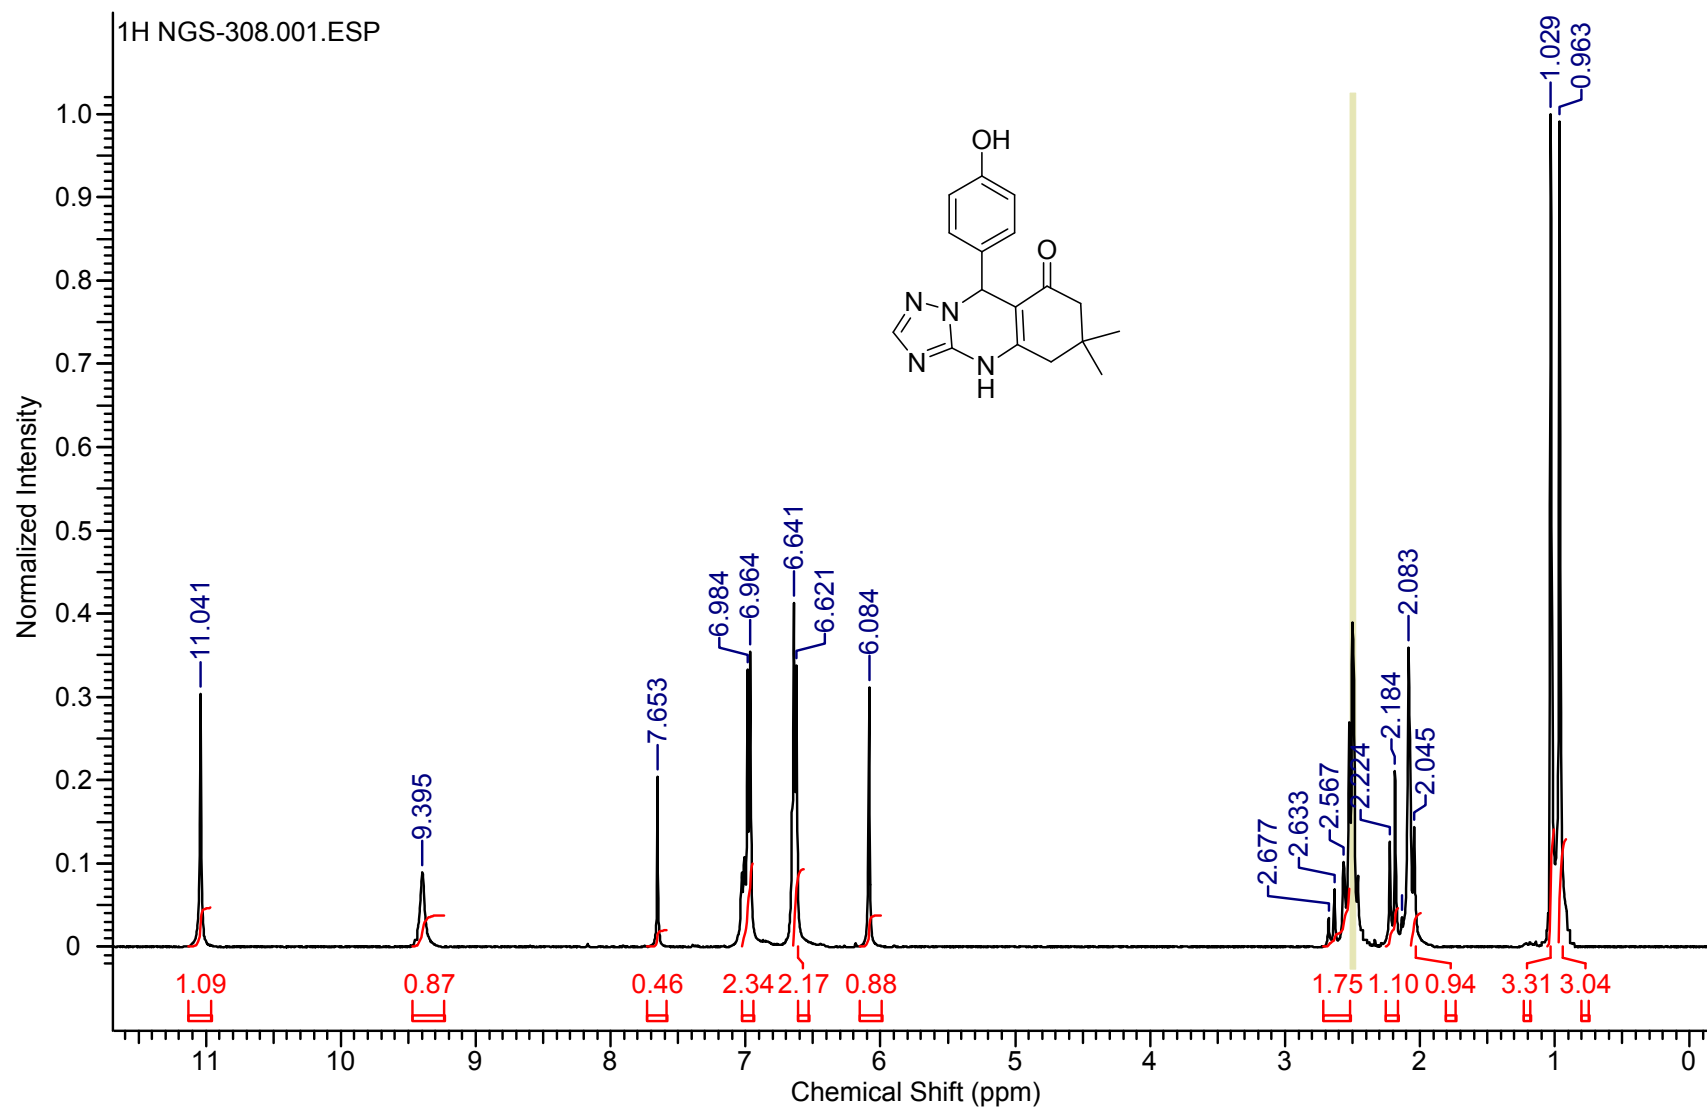



5h

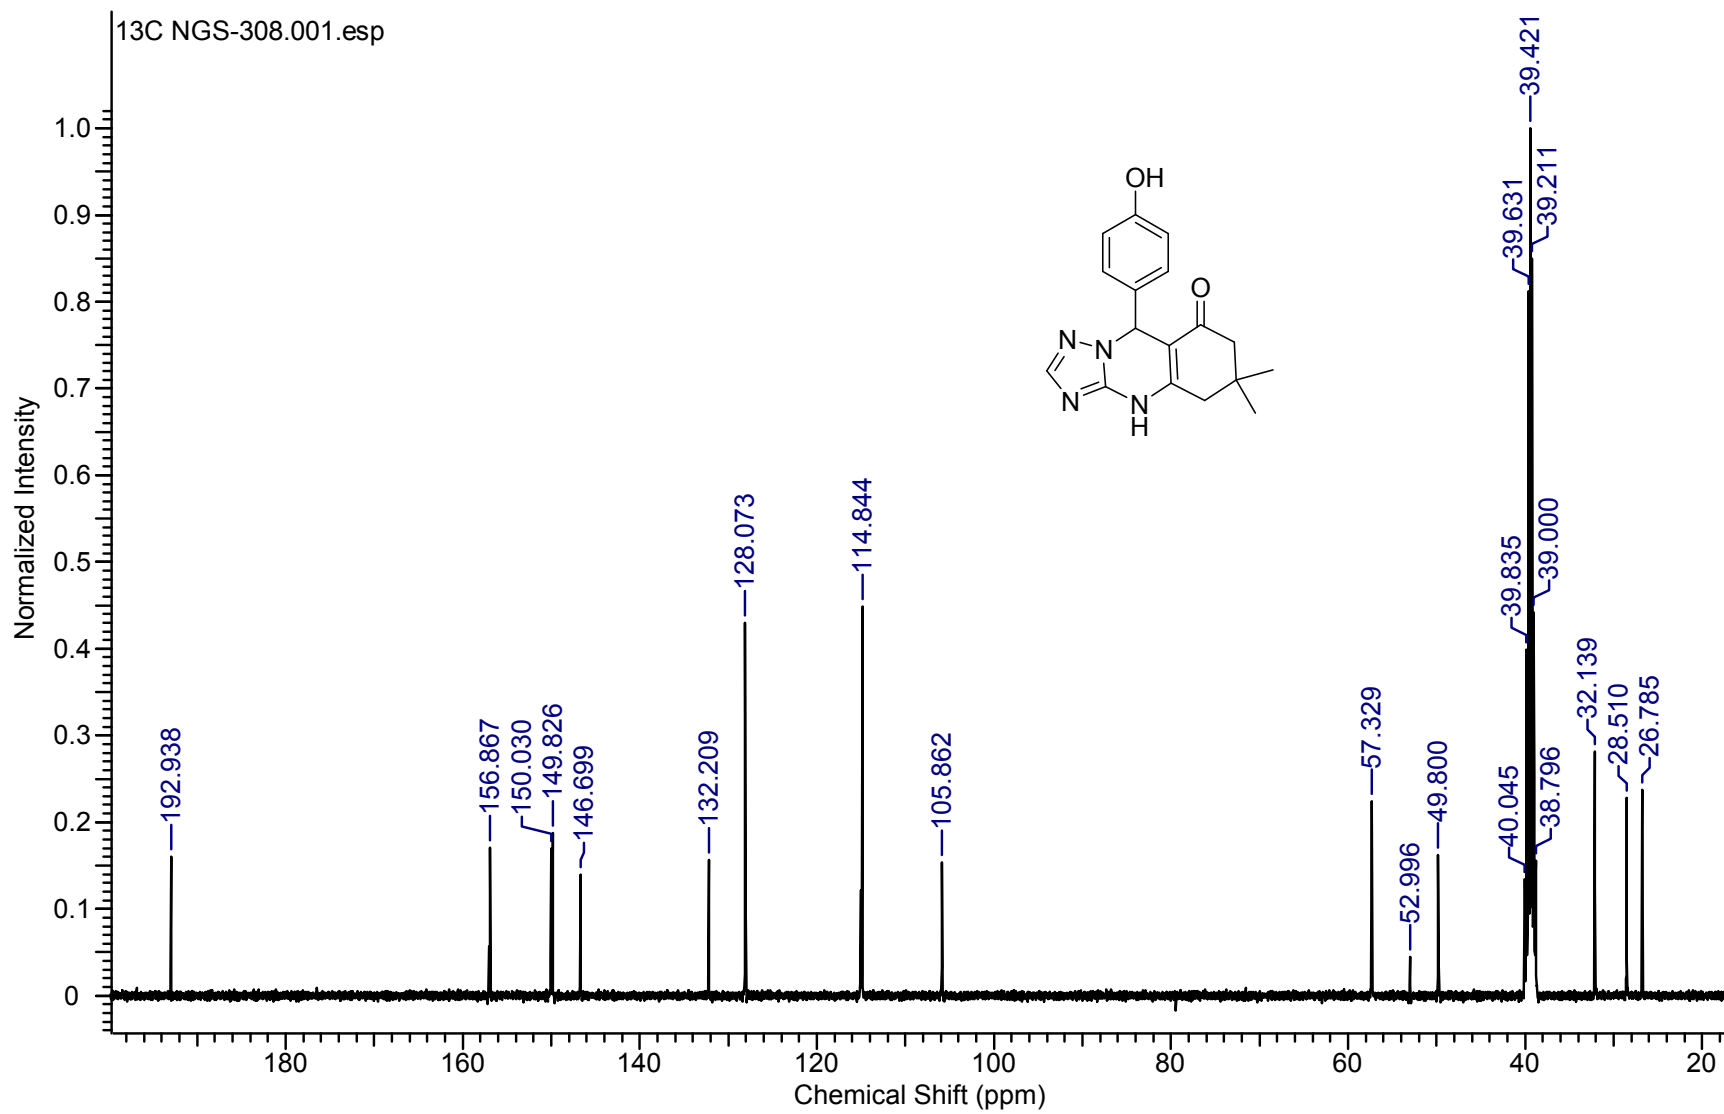

6a

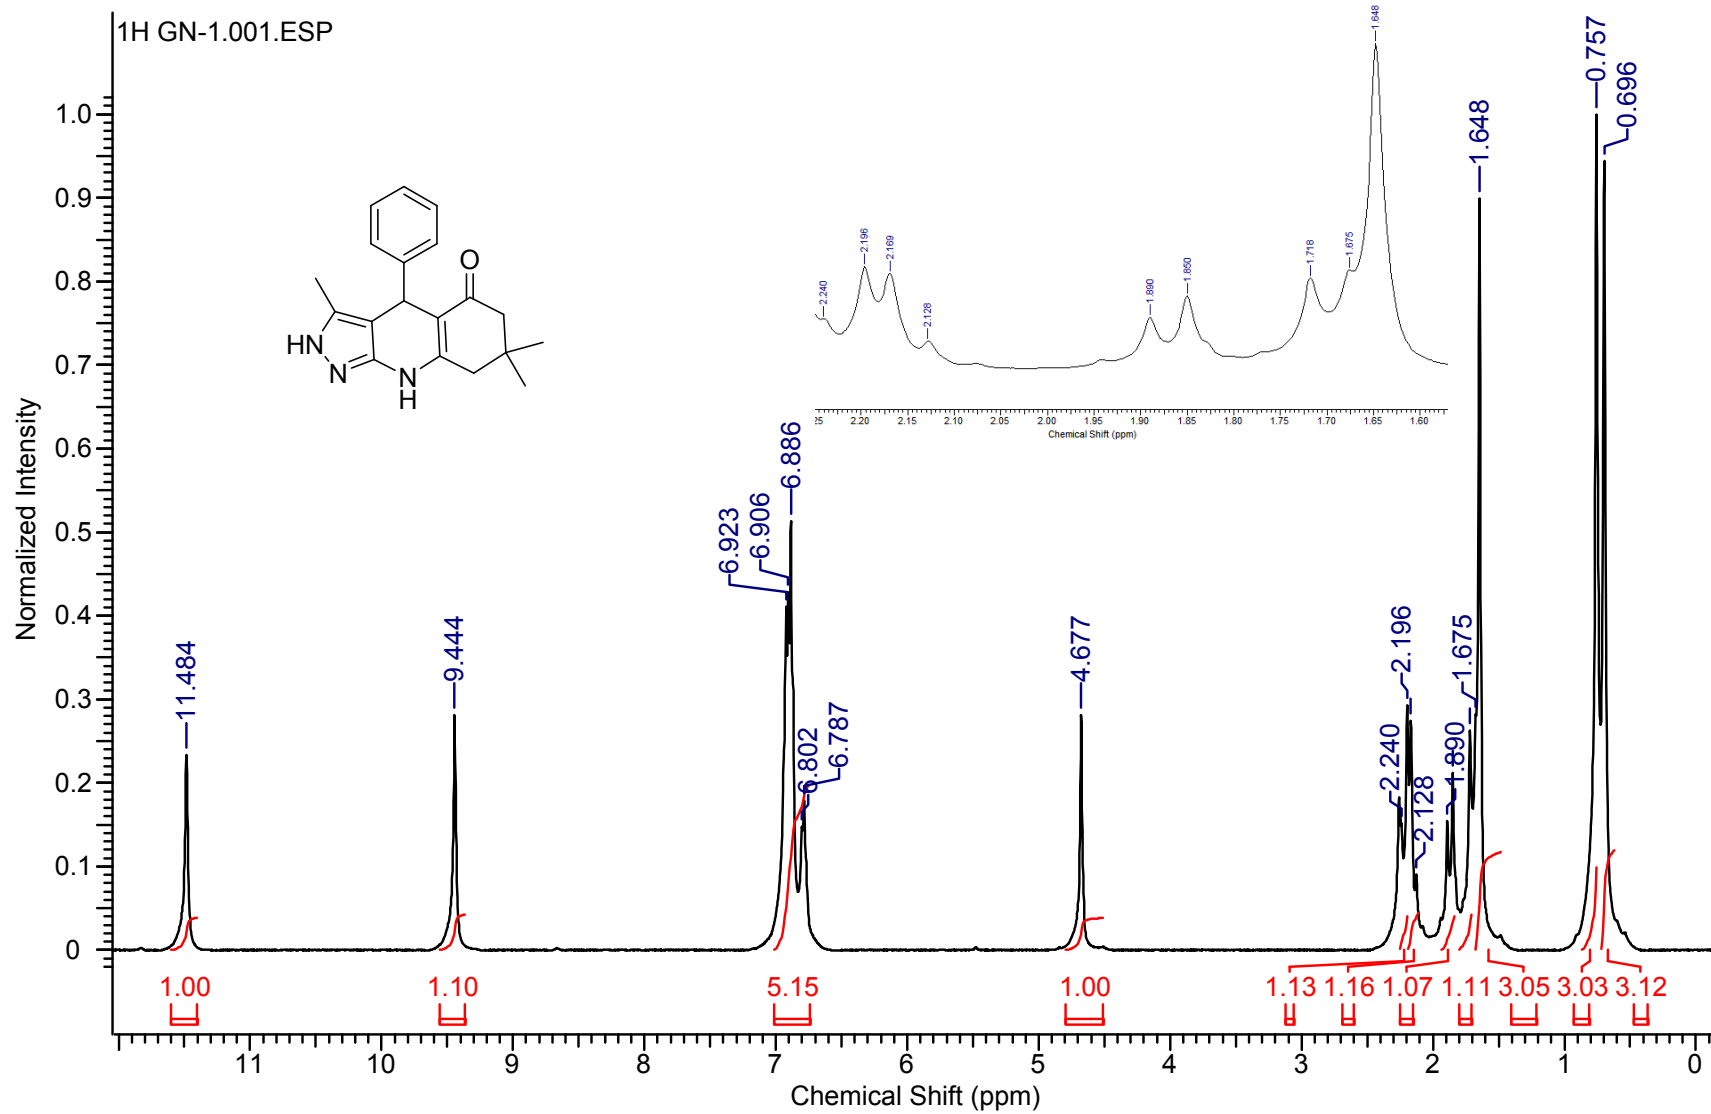

6a

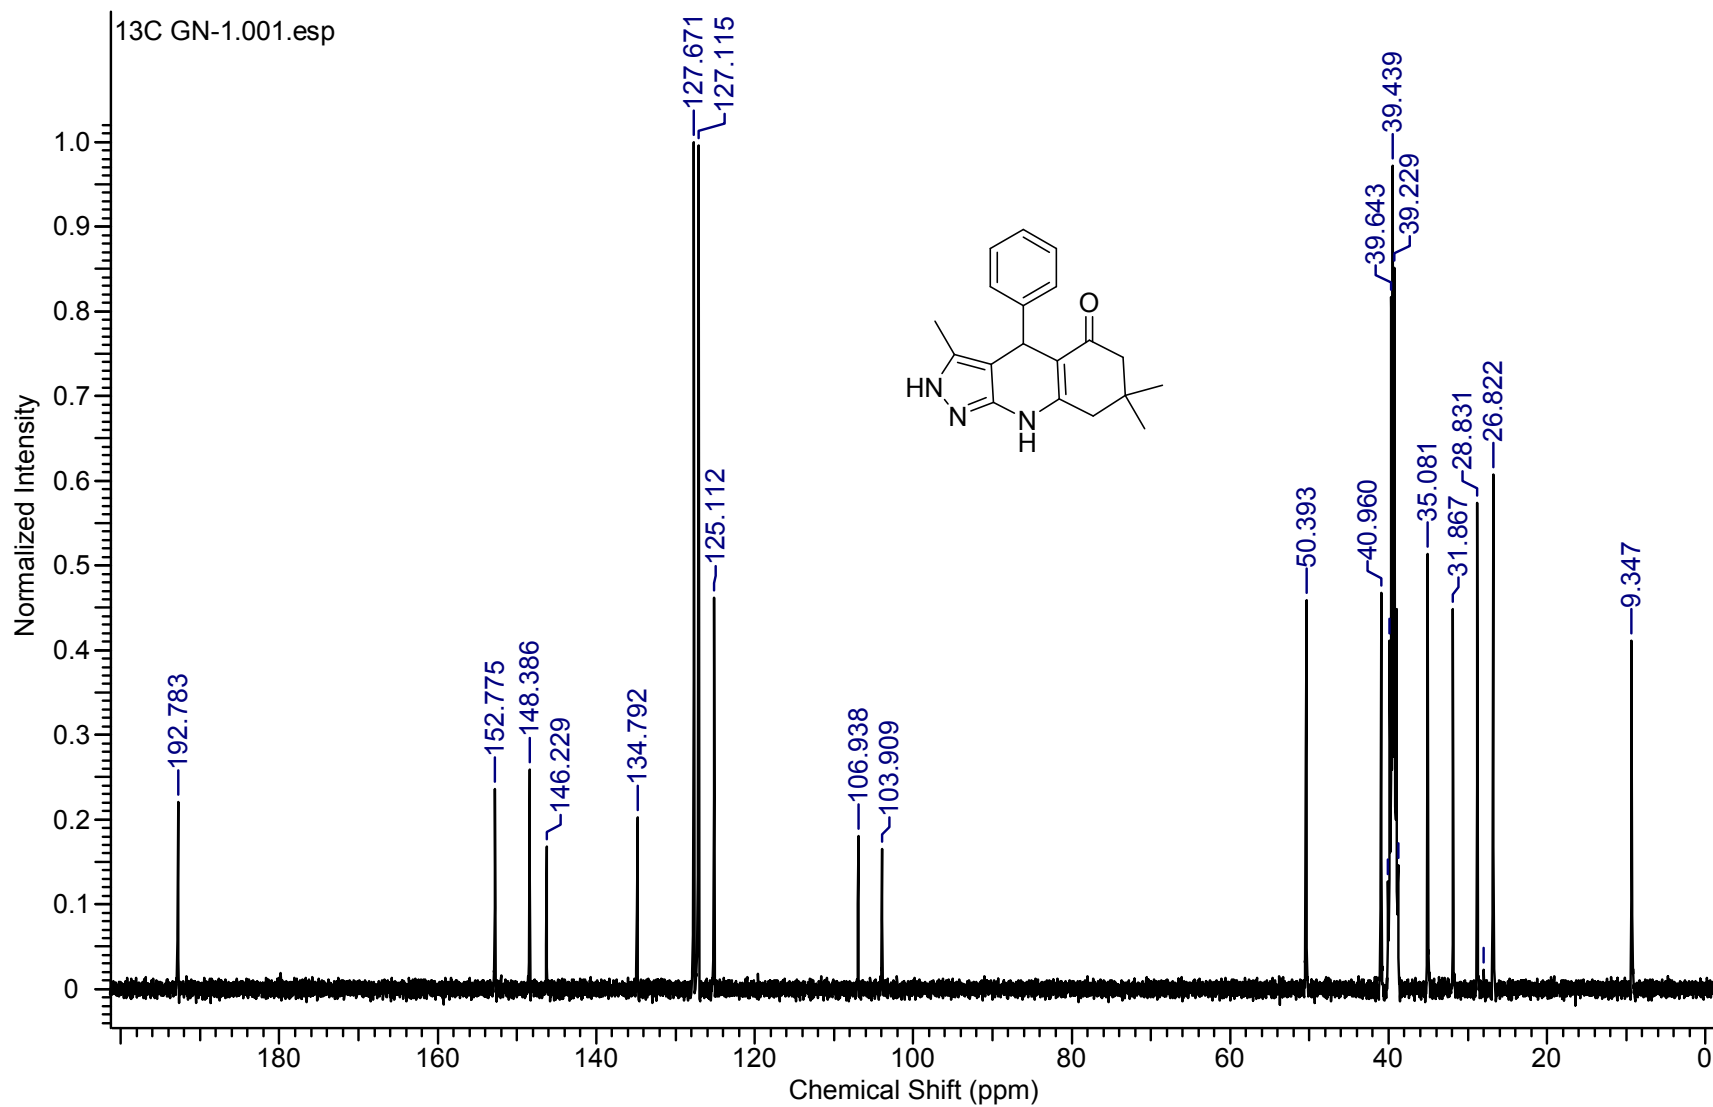

6b

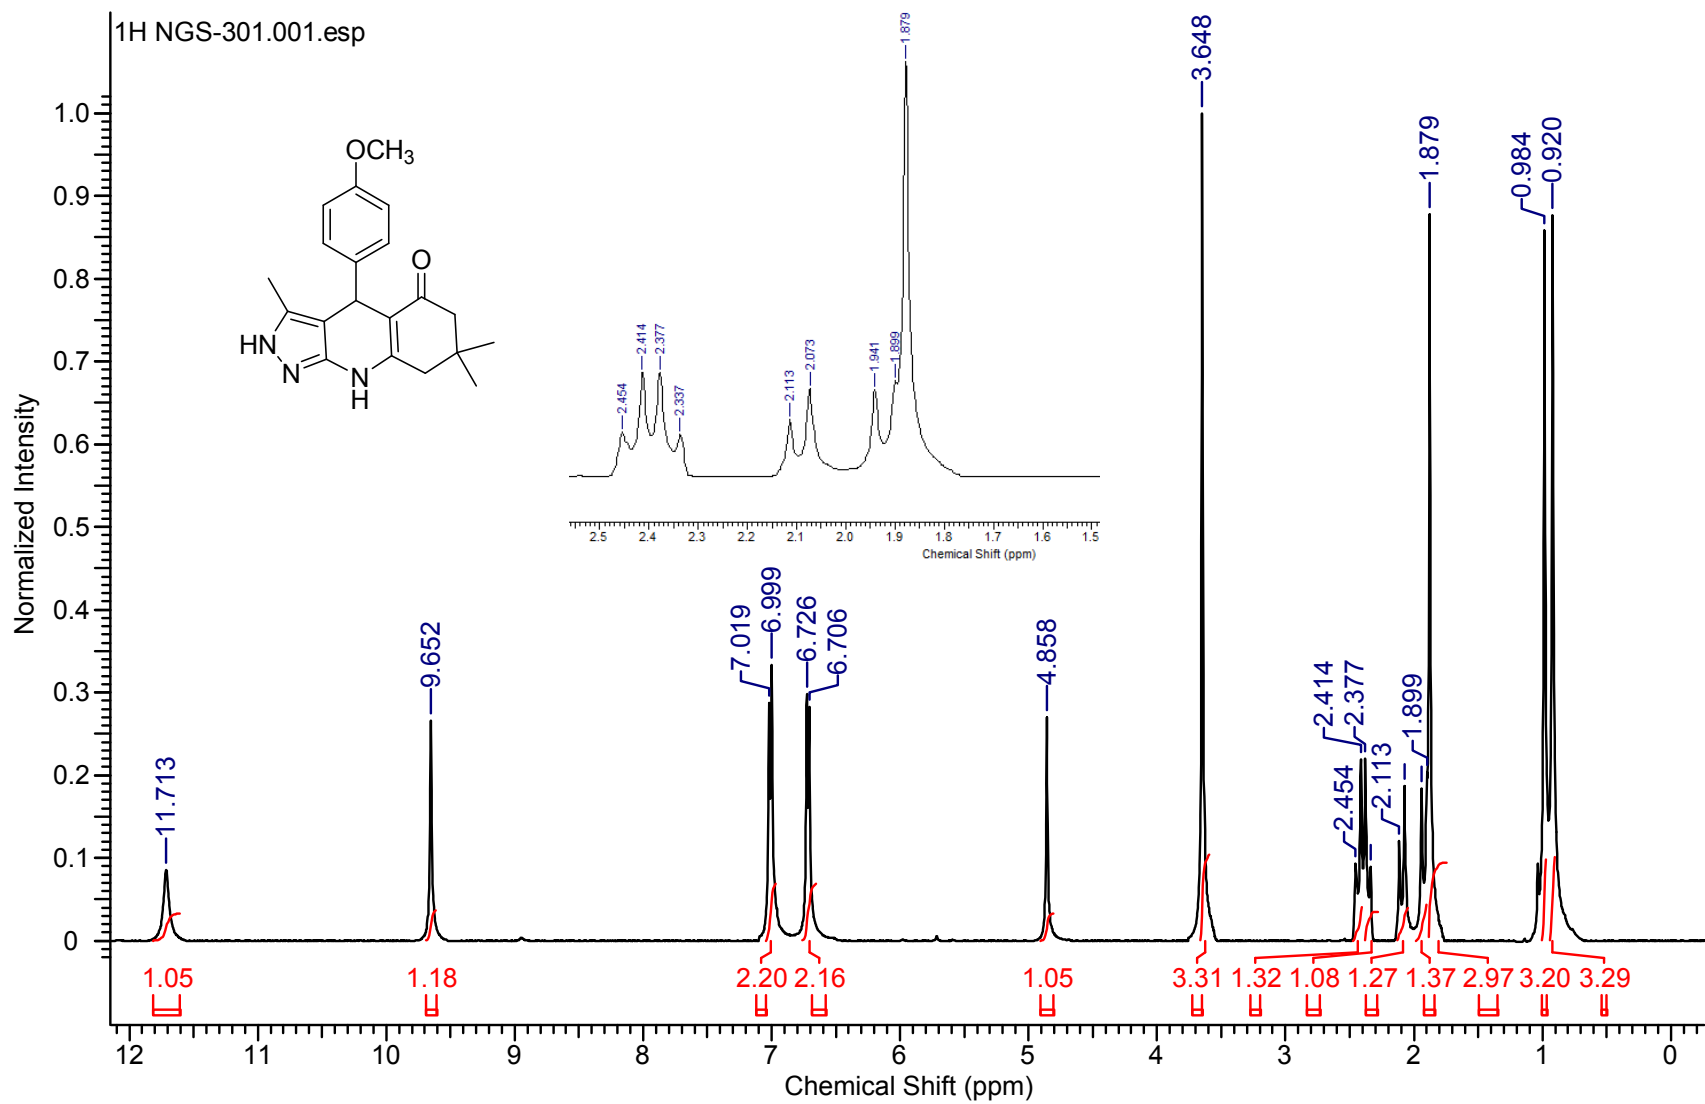

6b

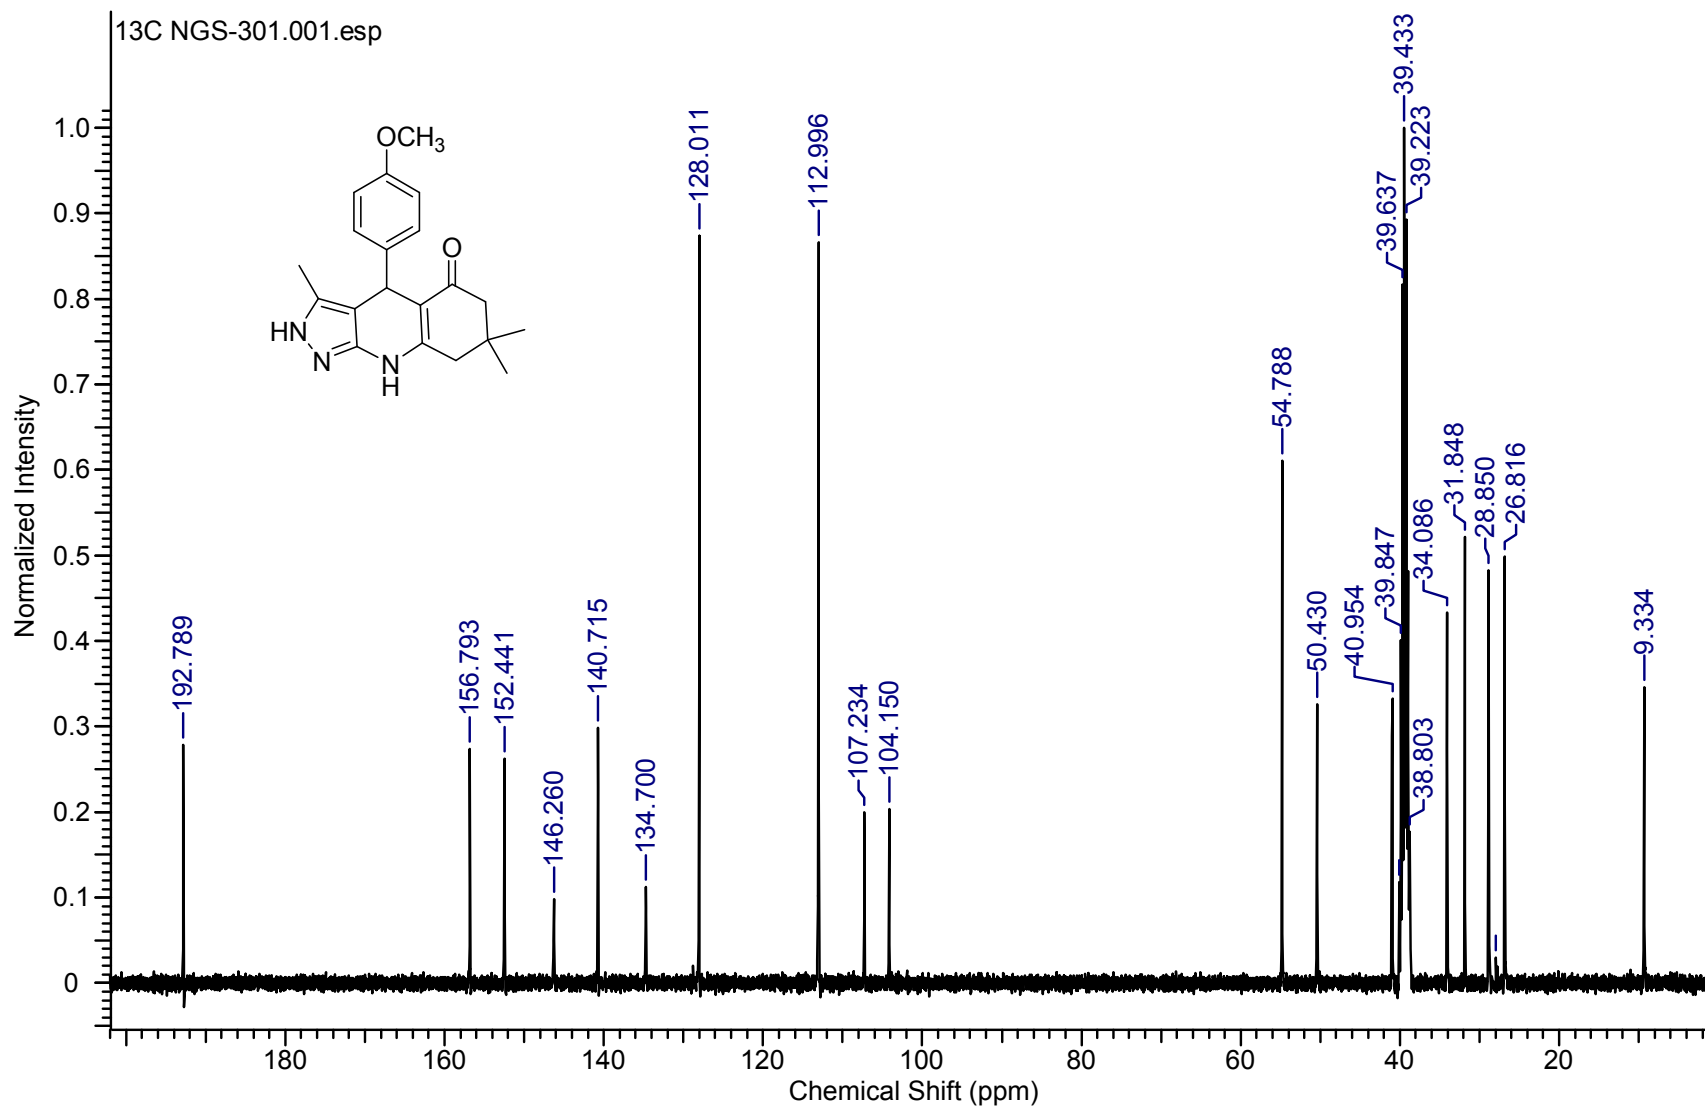

6c

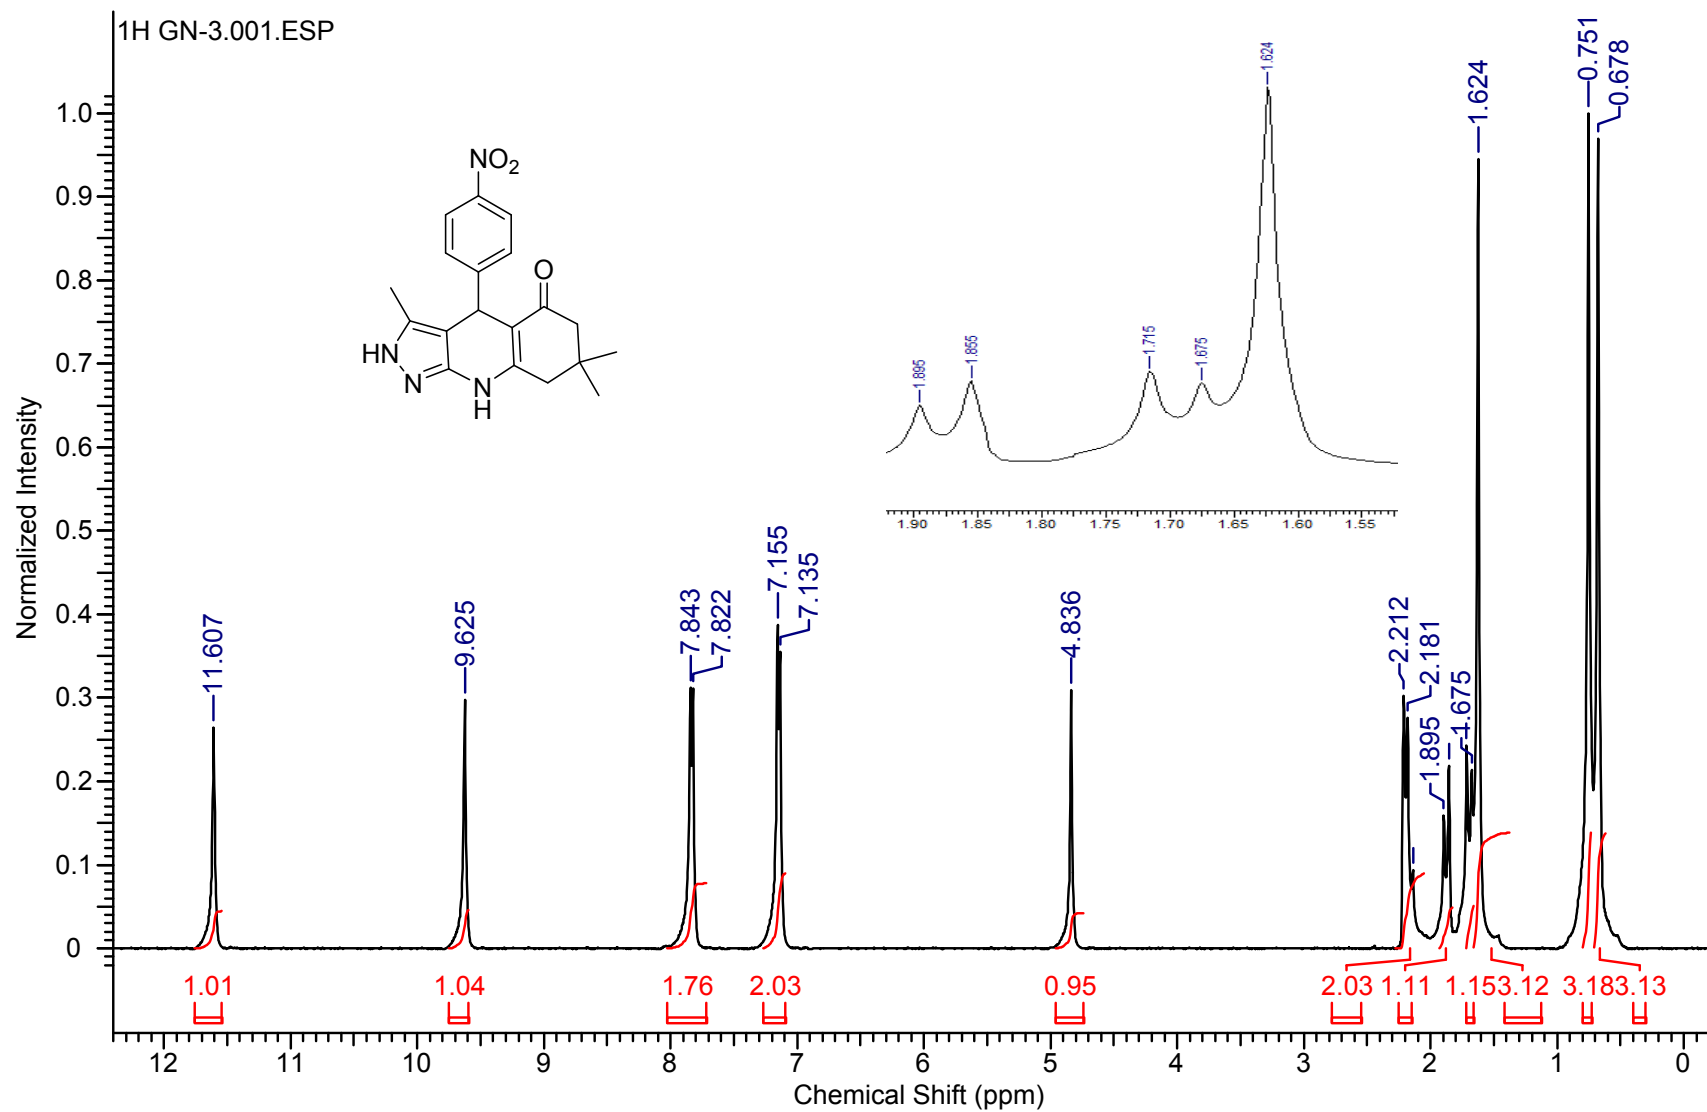

6c

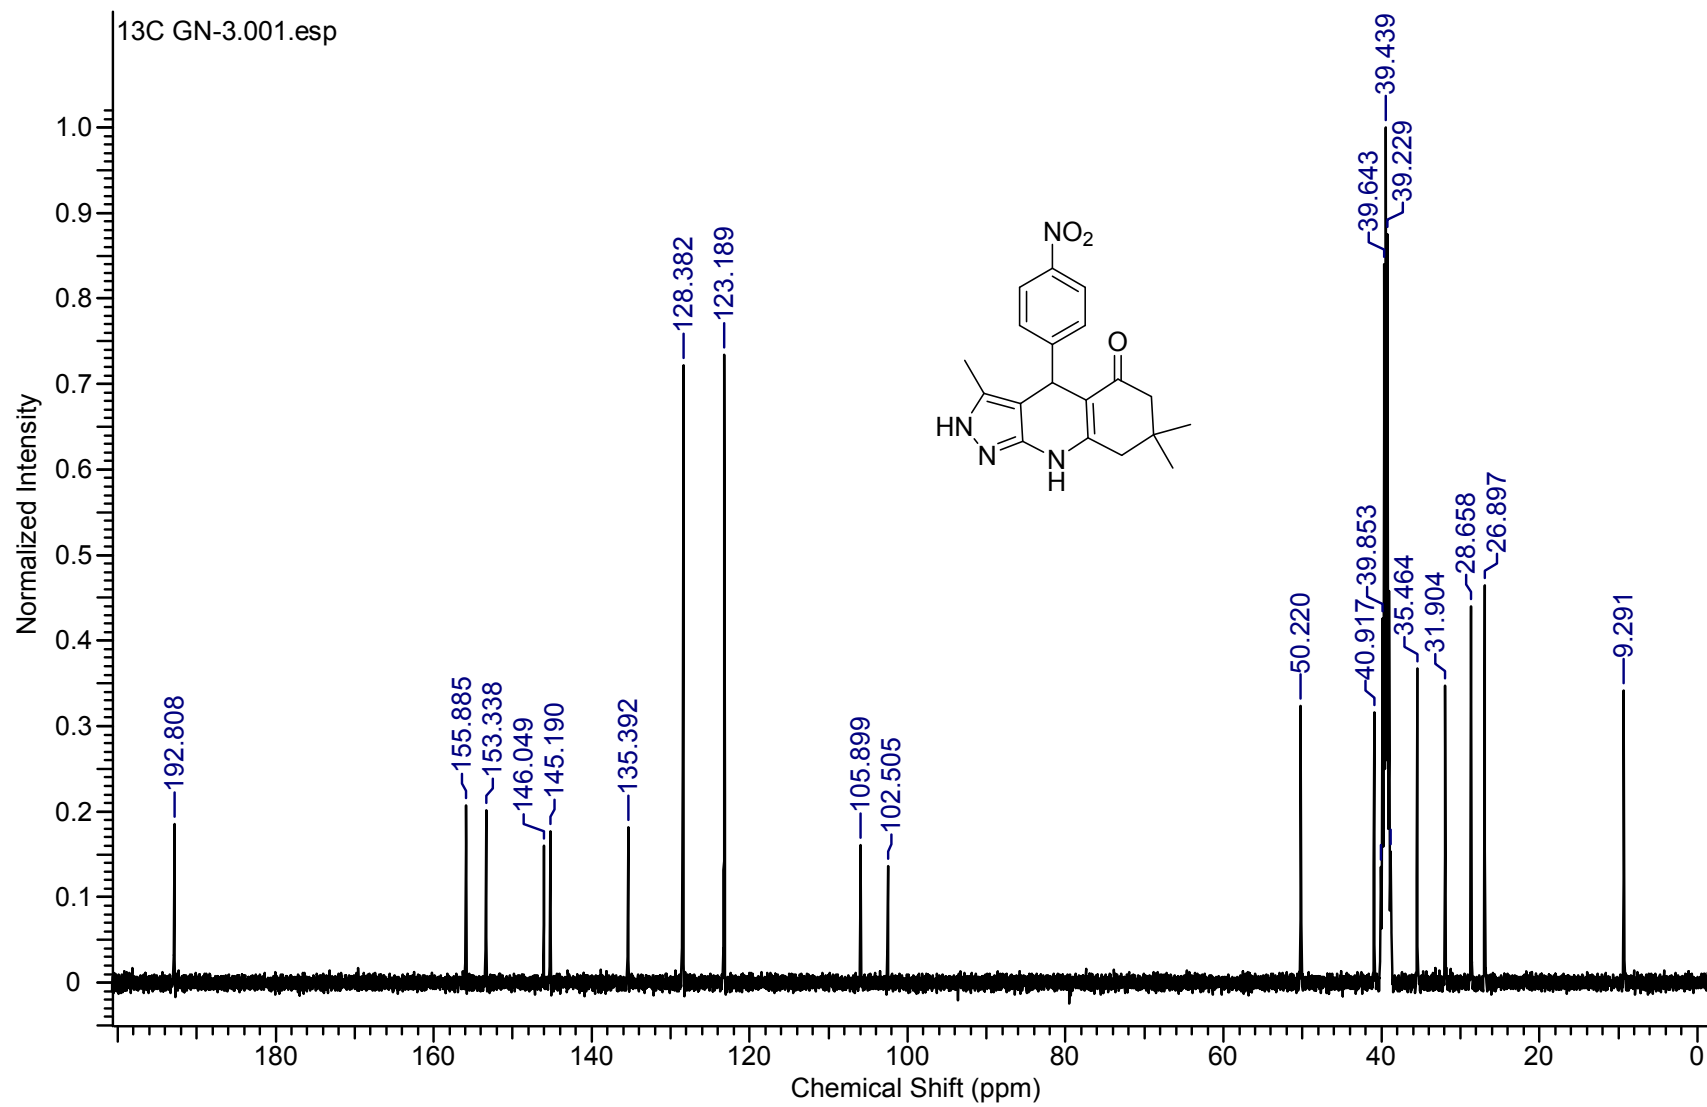

6d

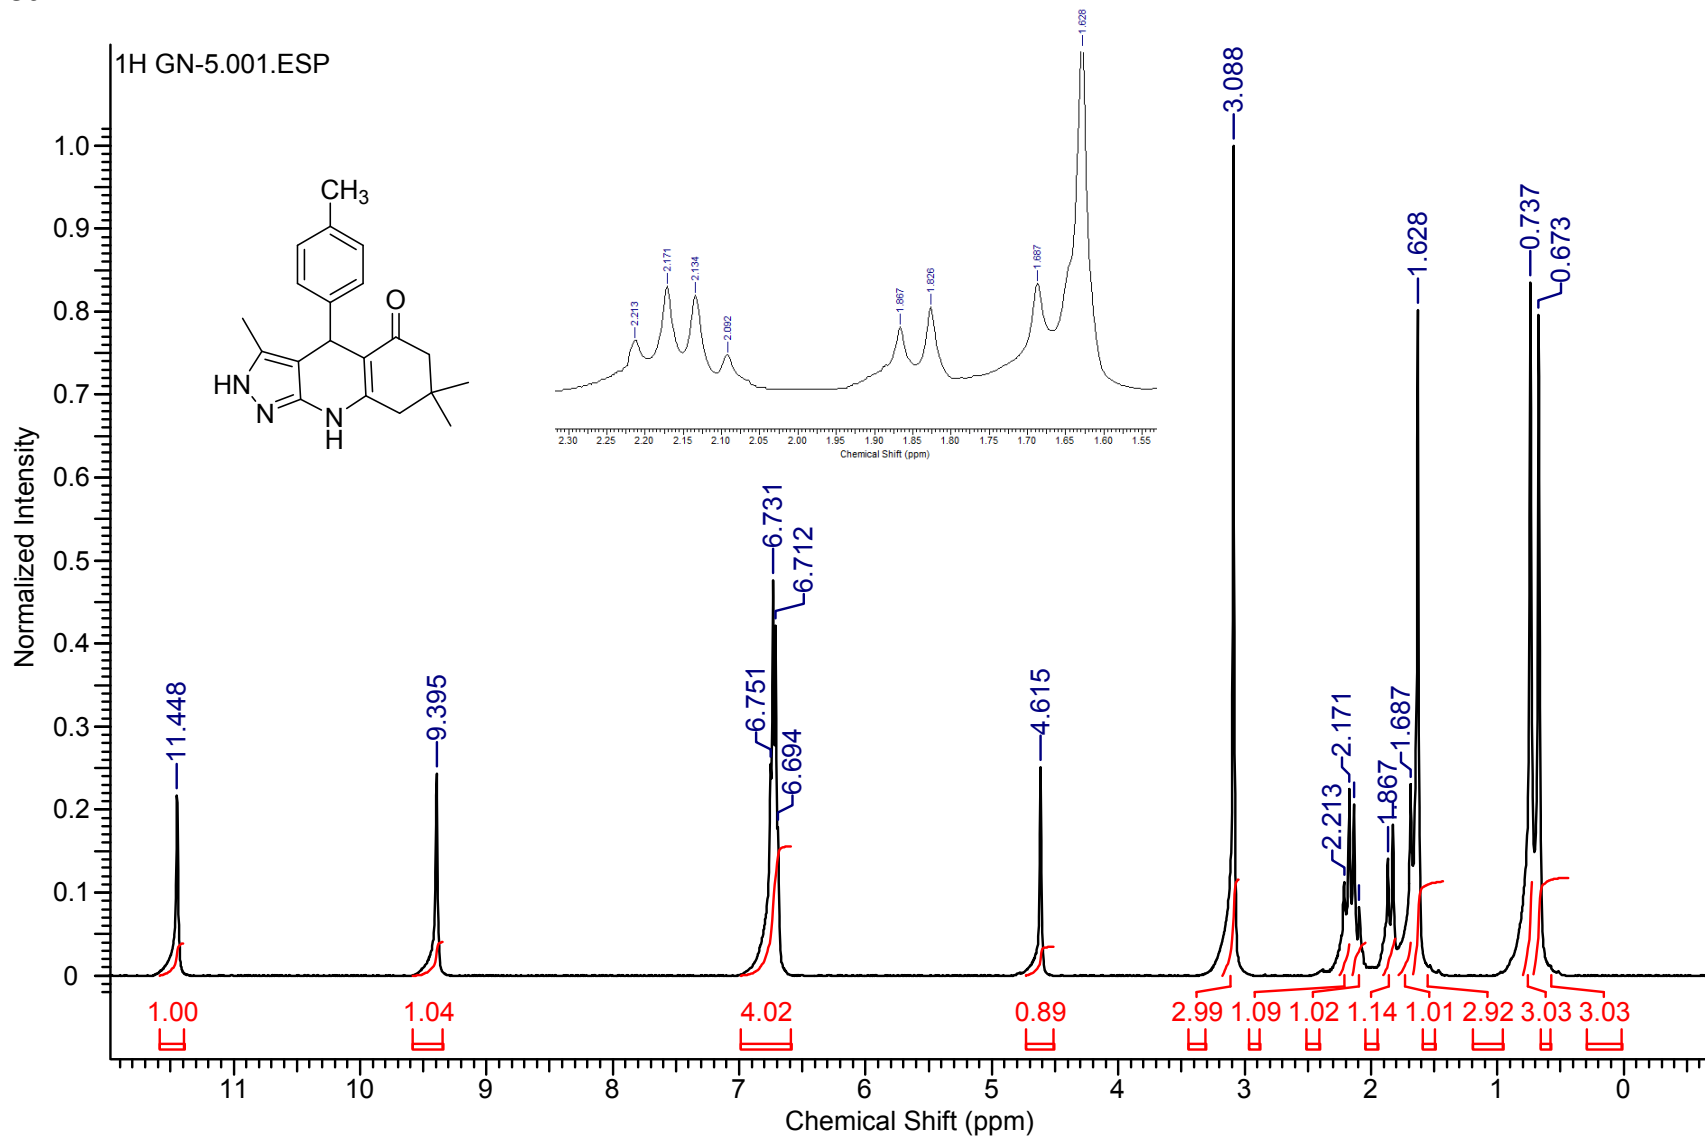



6d

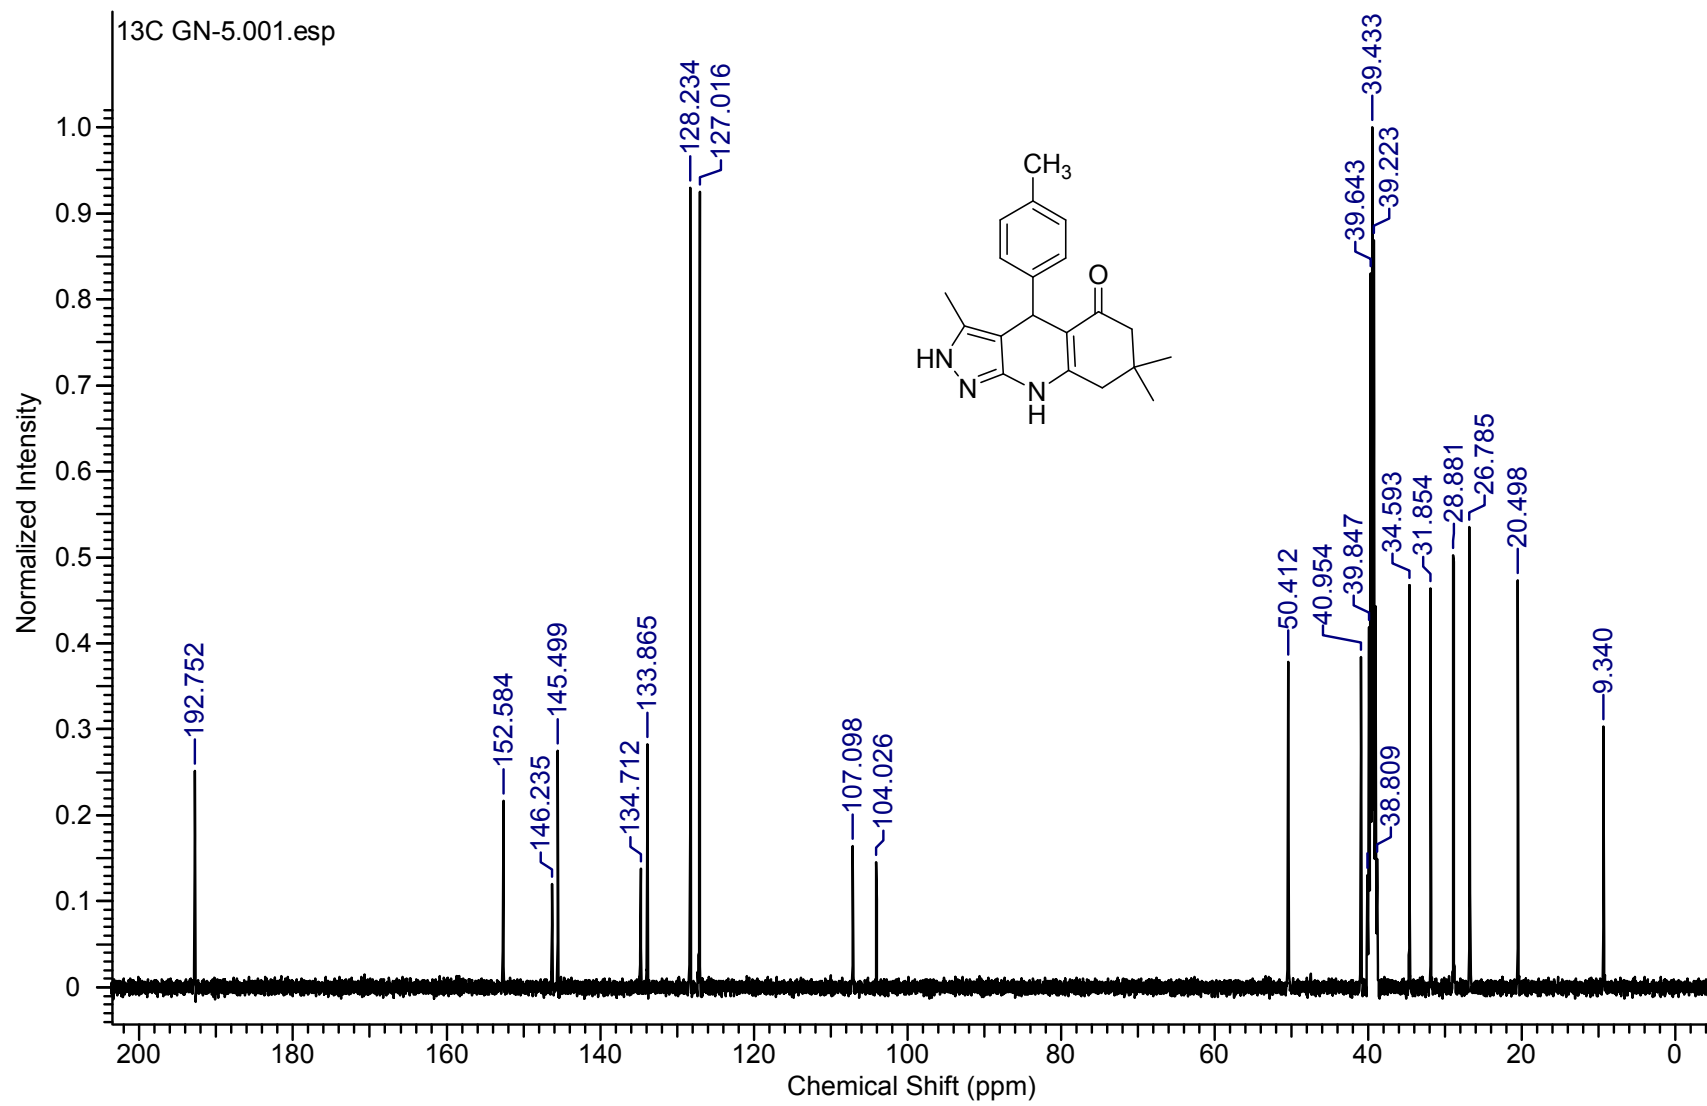

6e

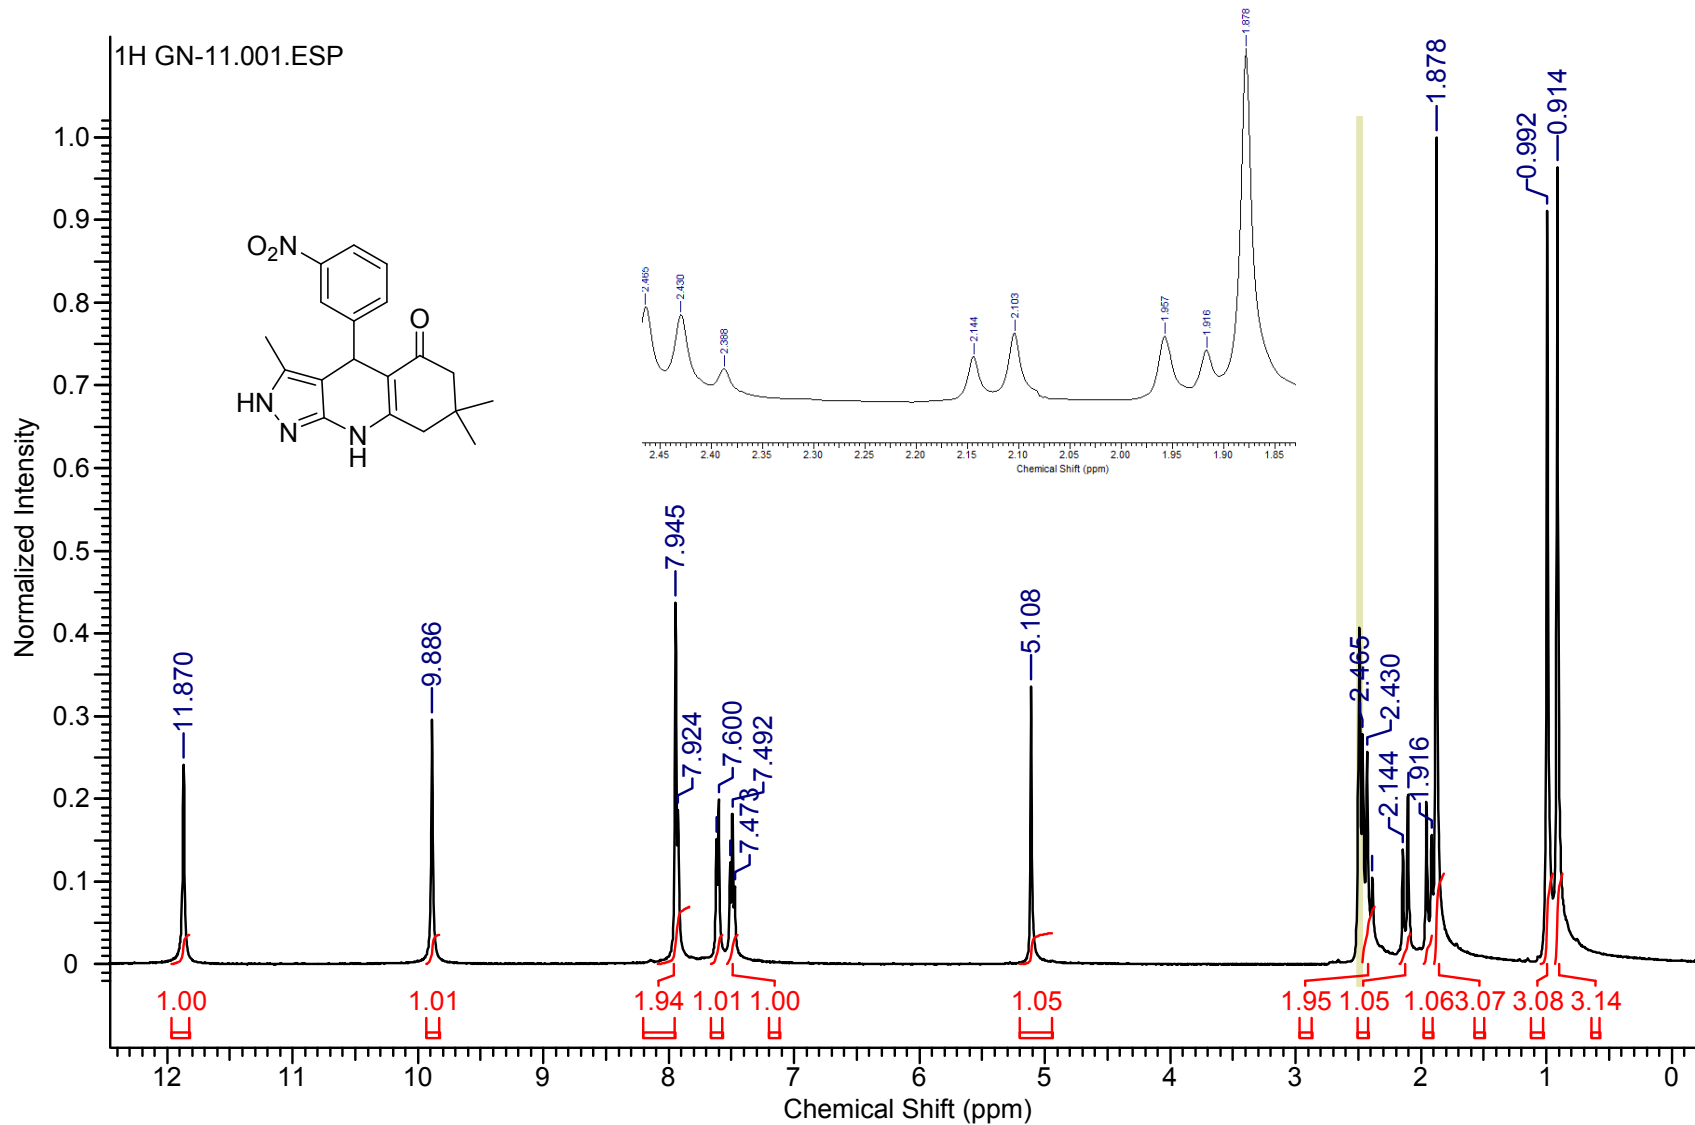

6e

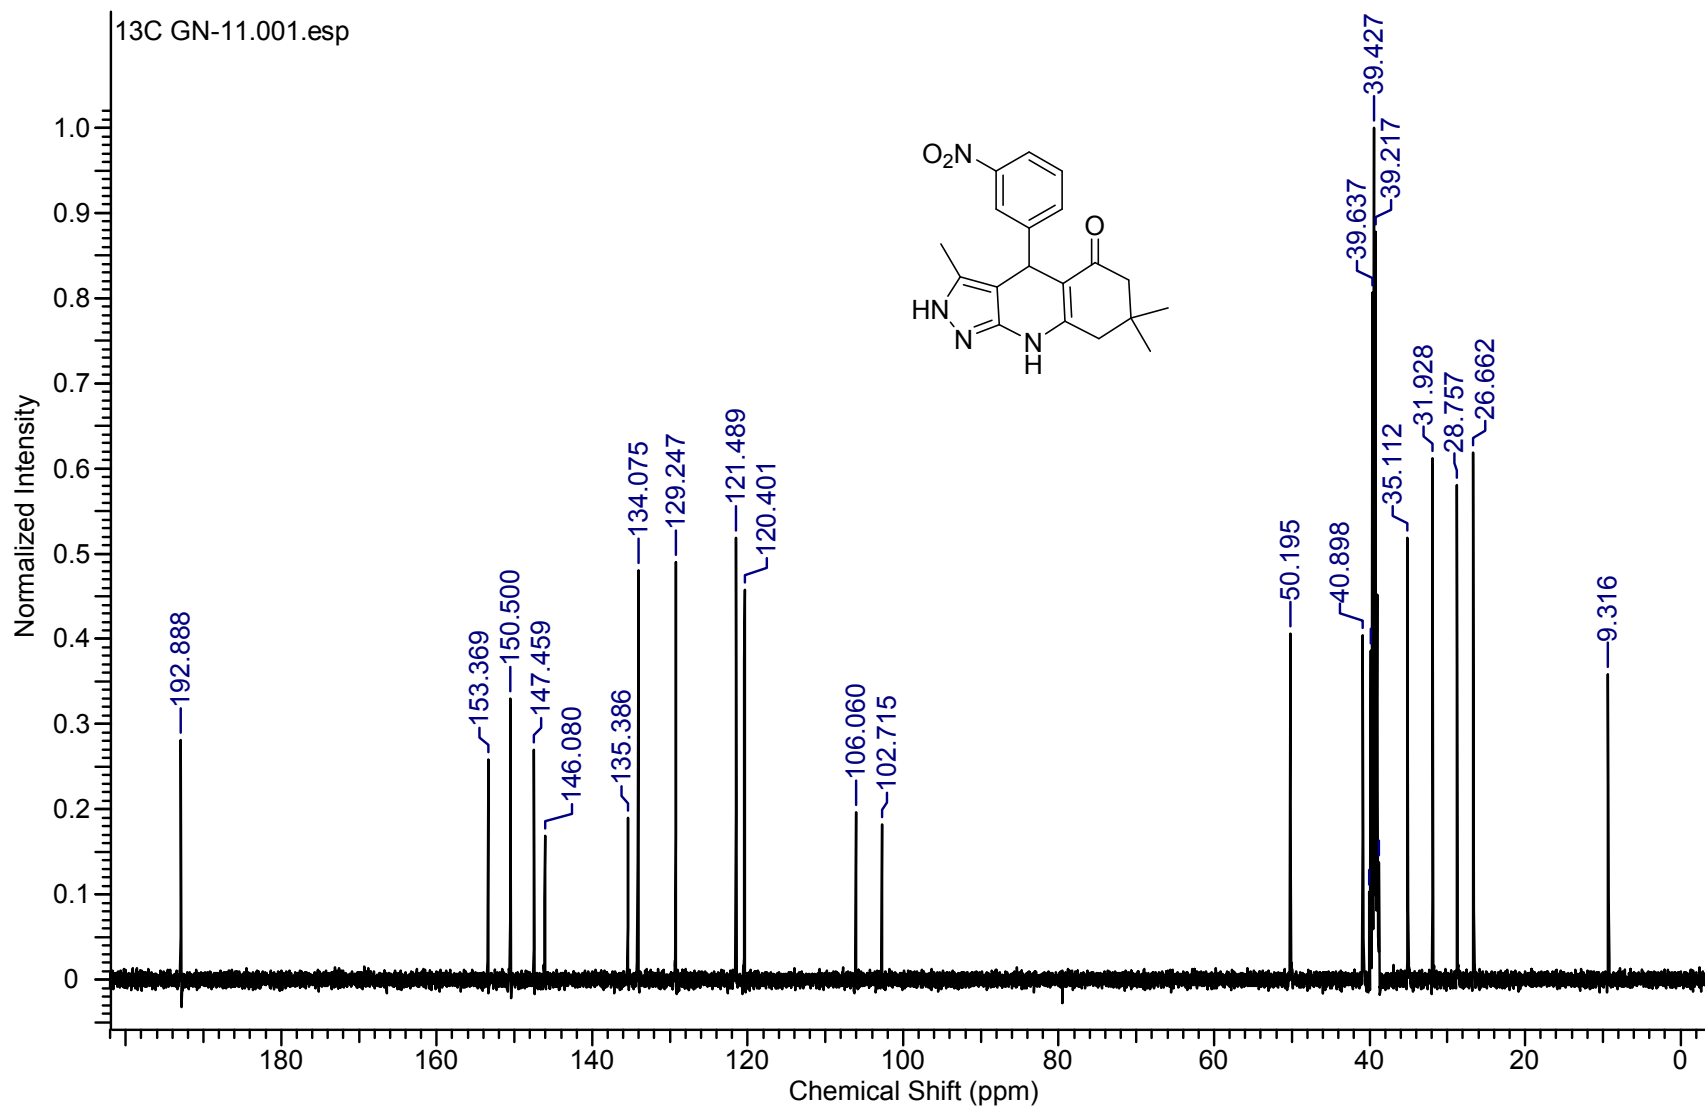

6f

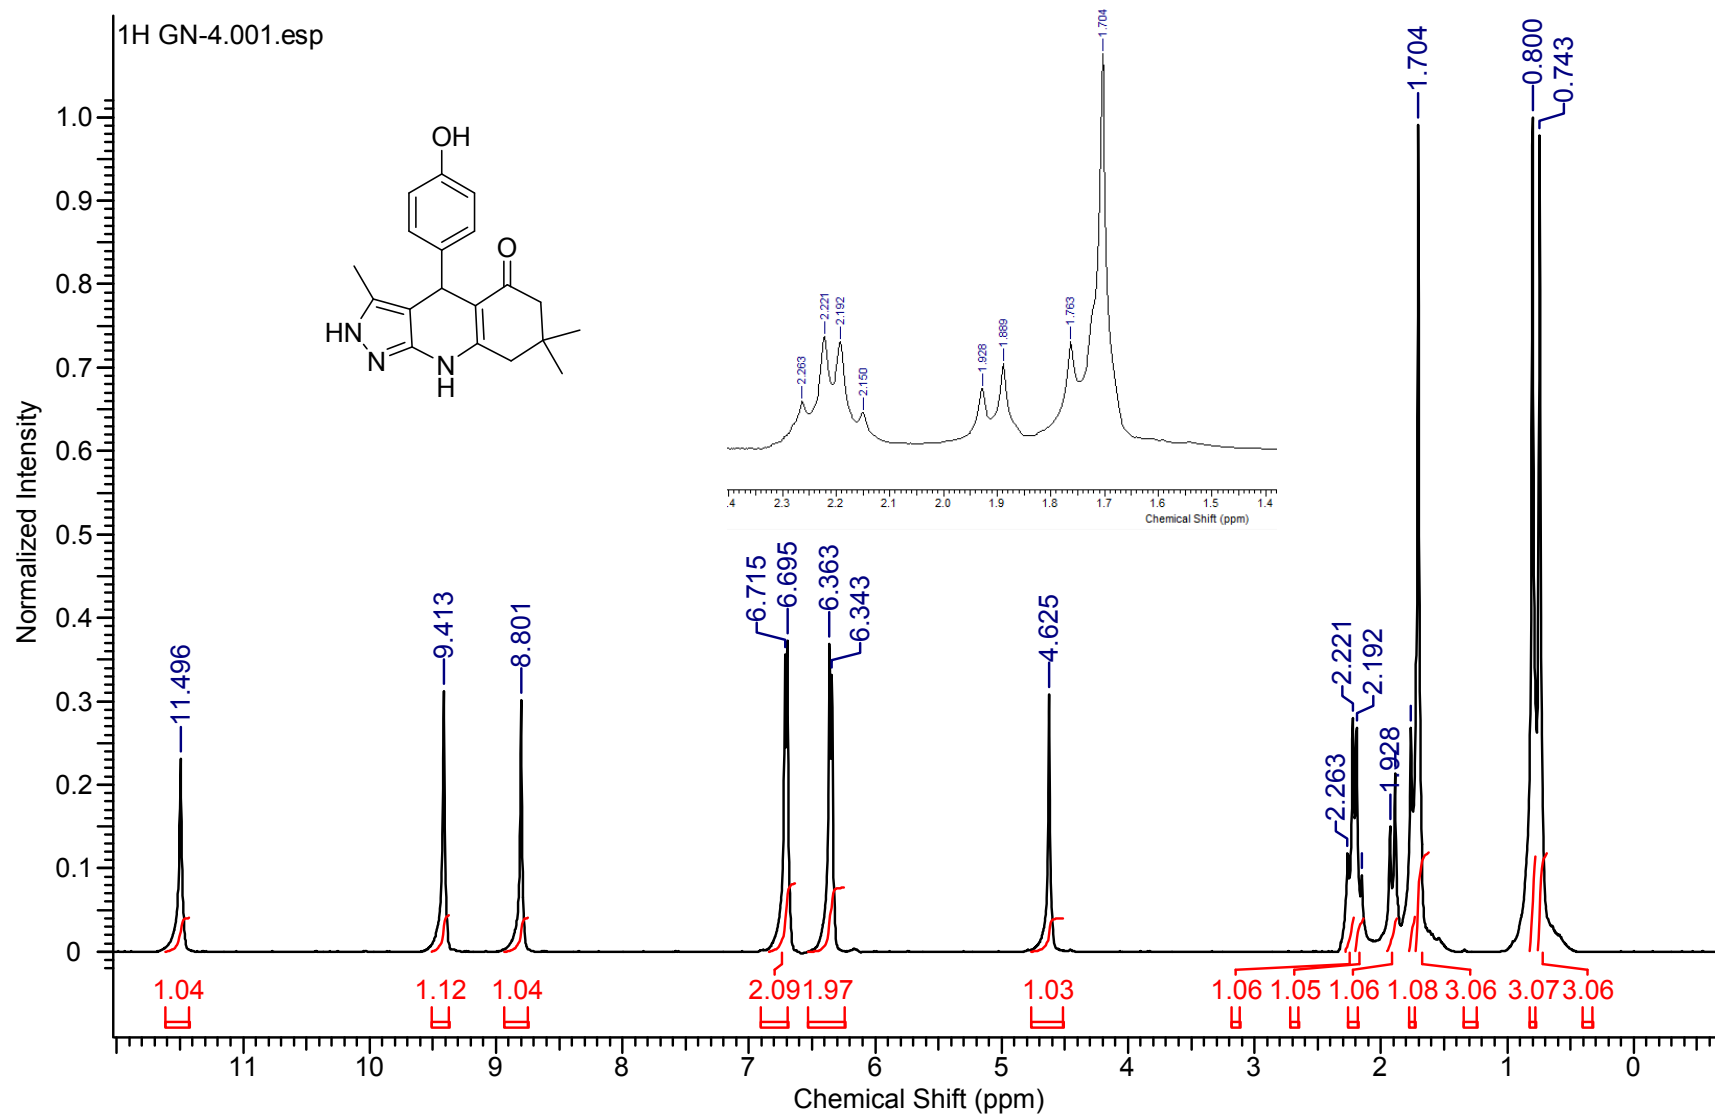

6f

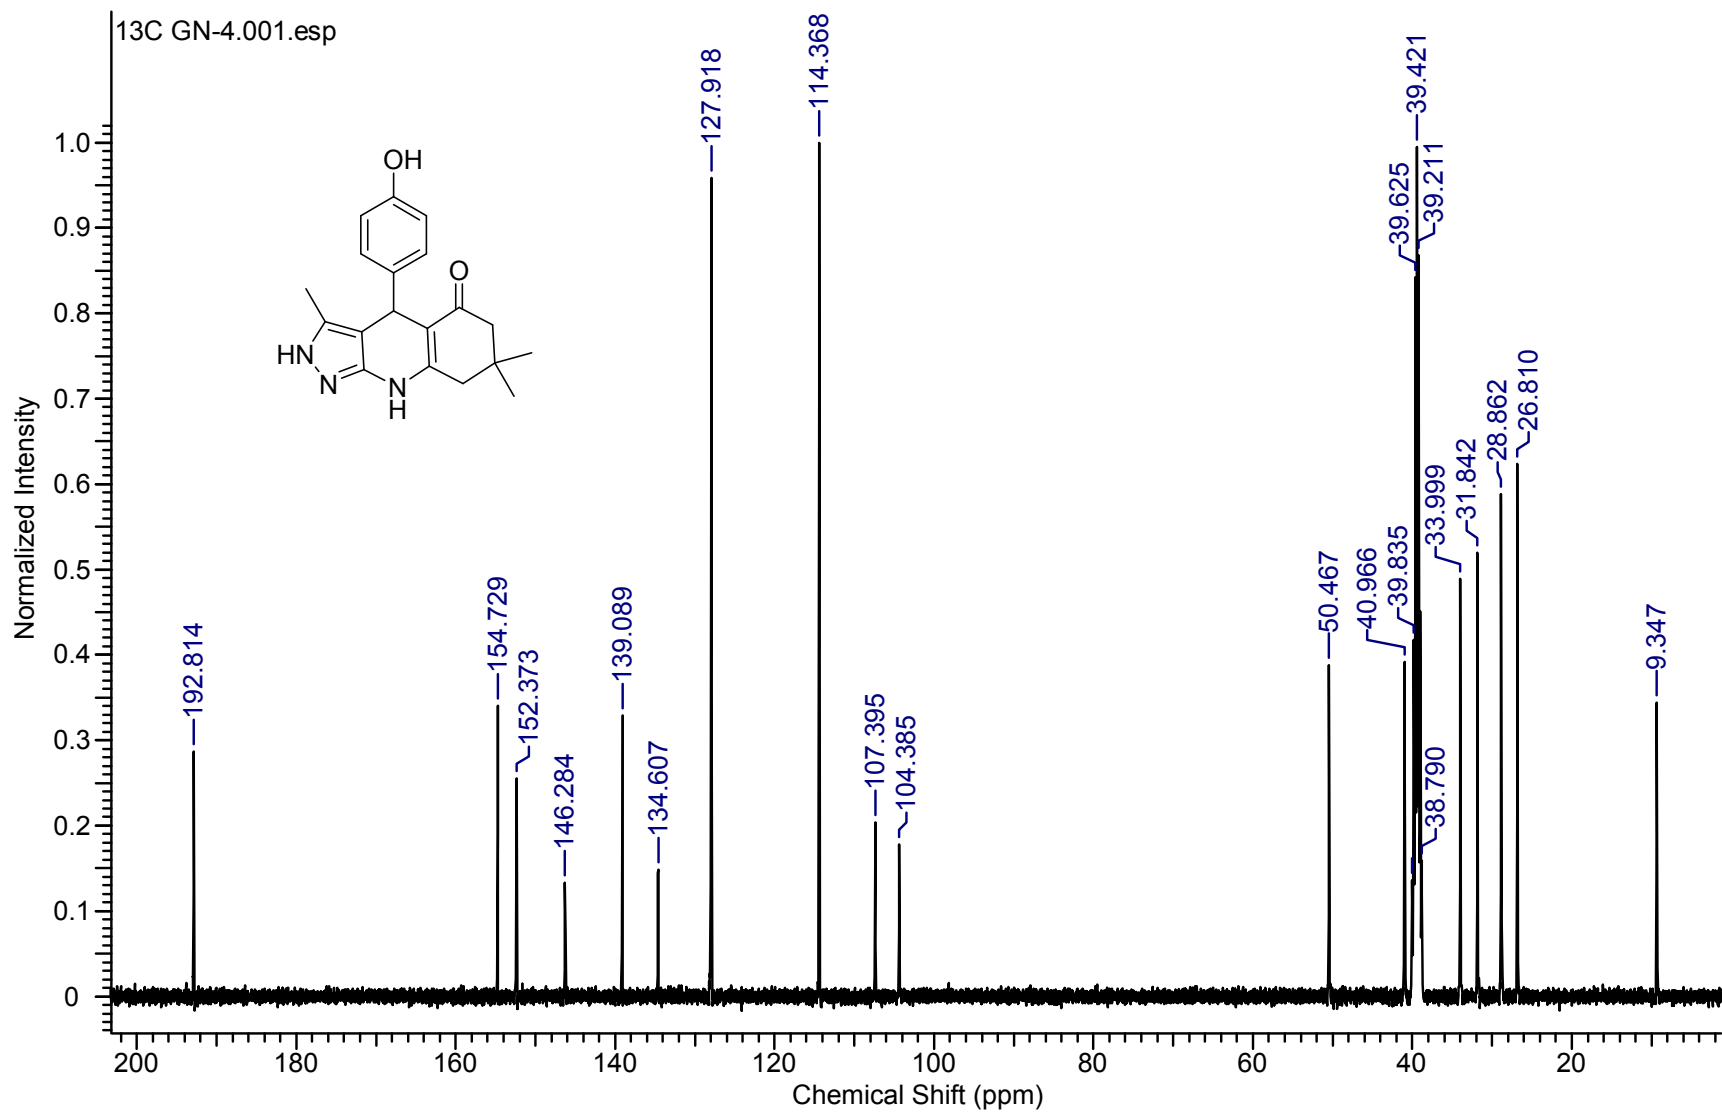

6g

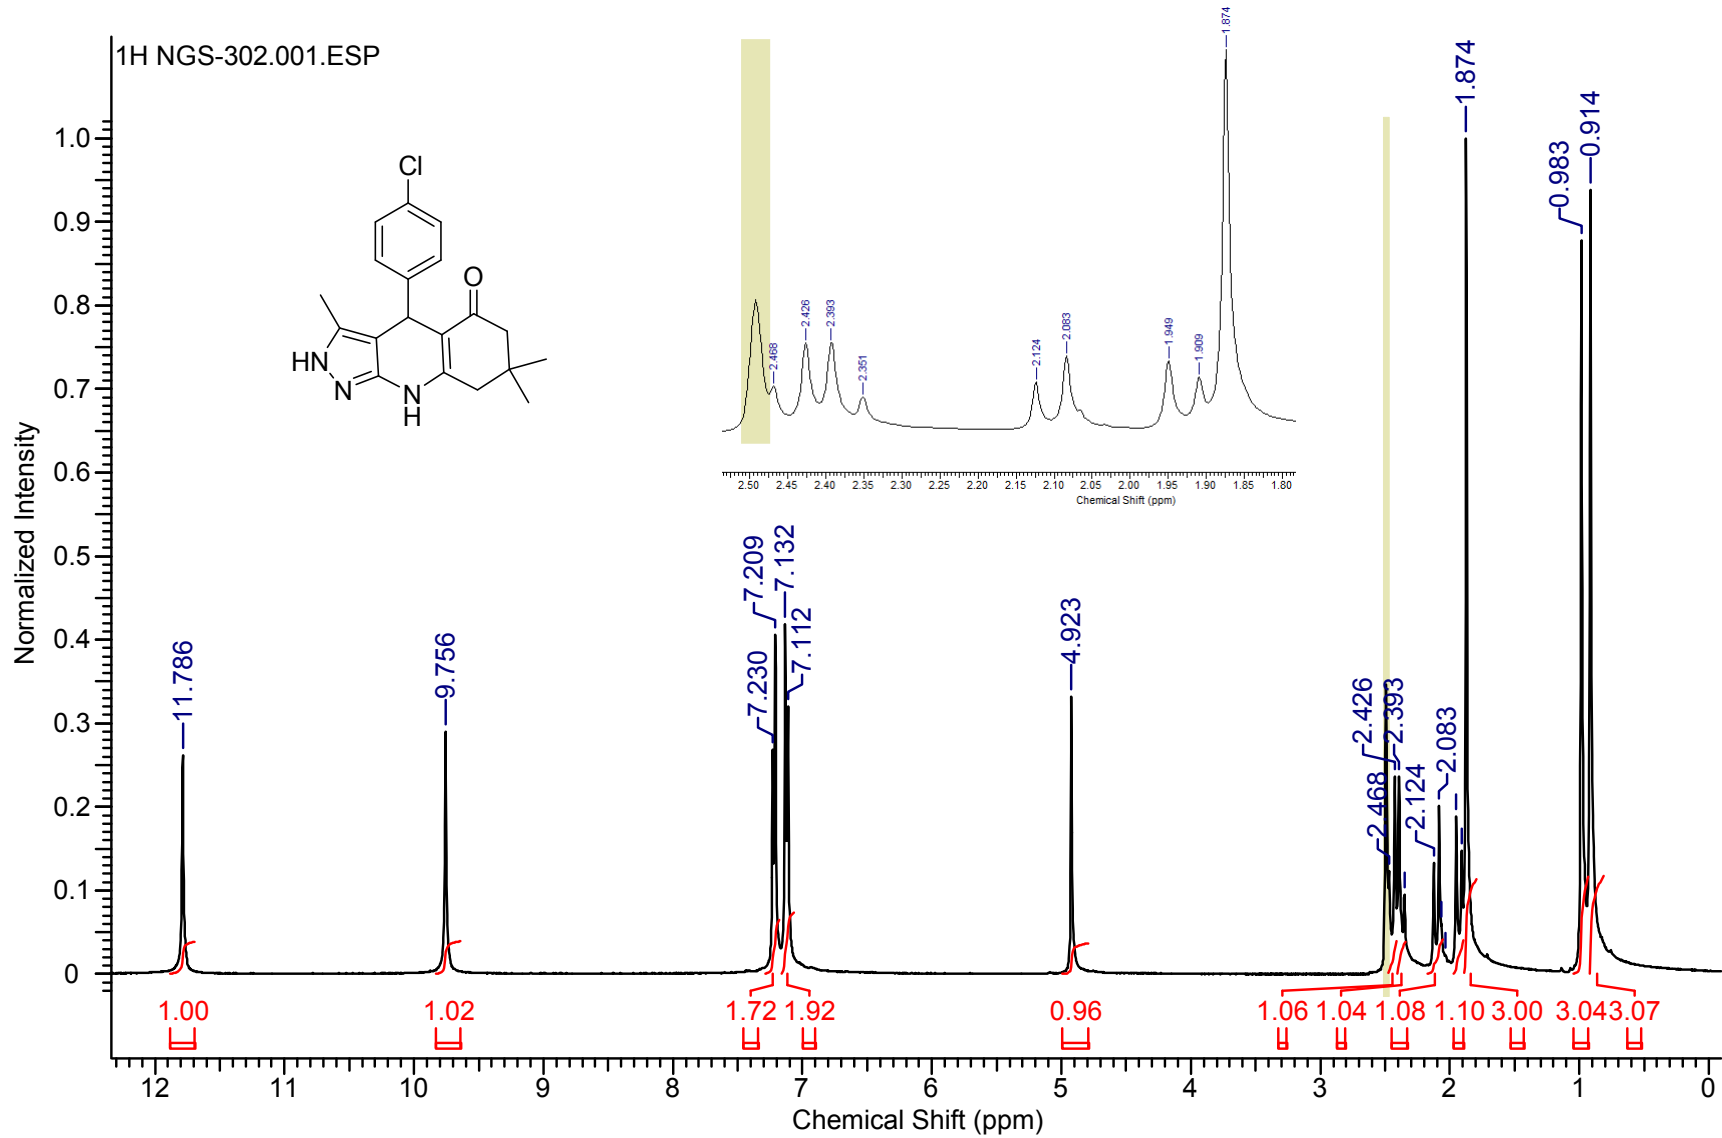

6g

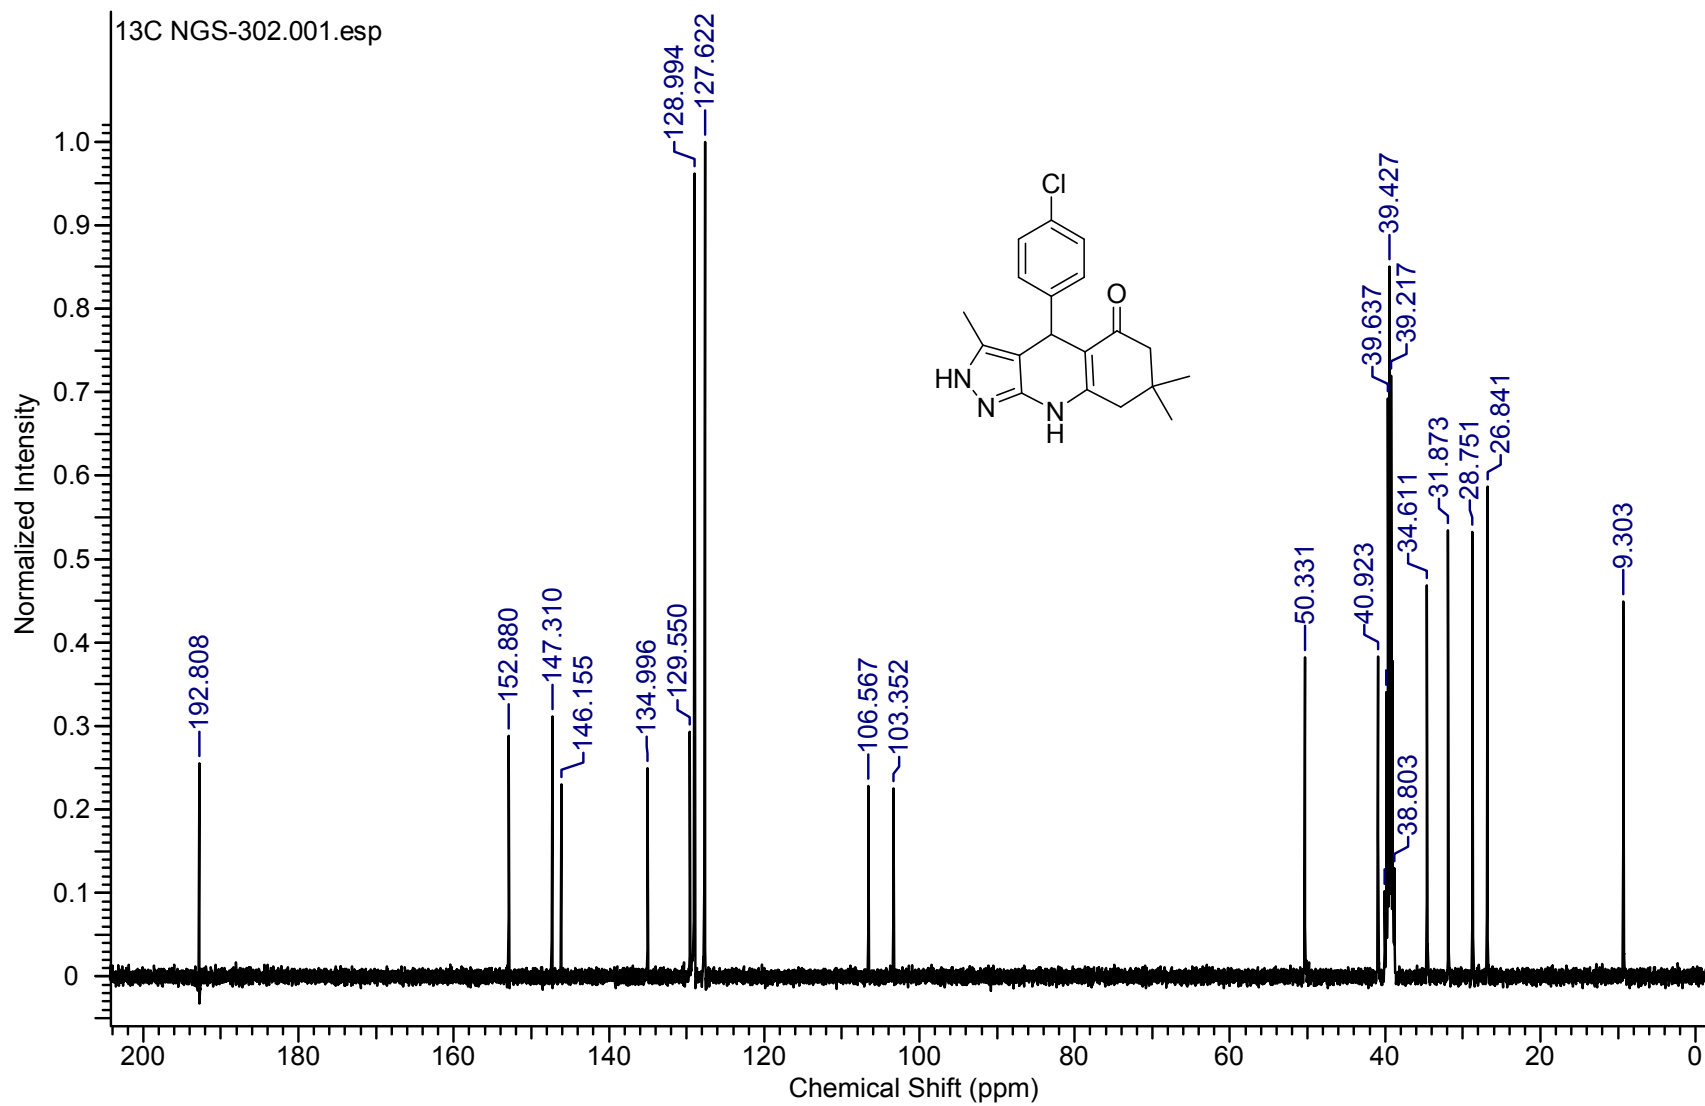

6h

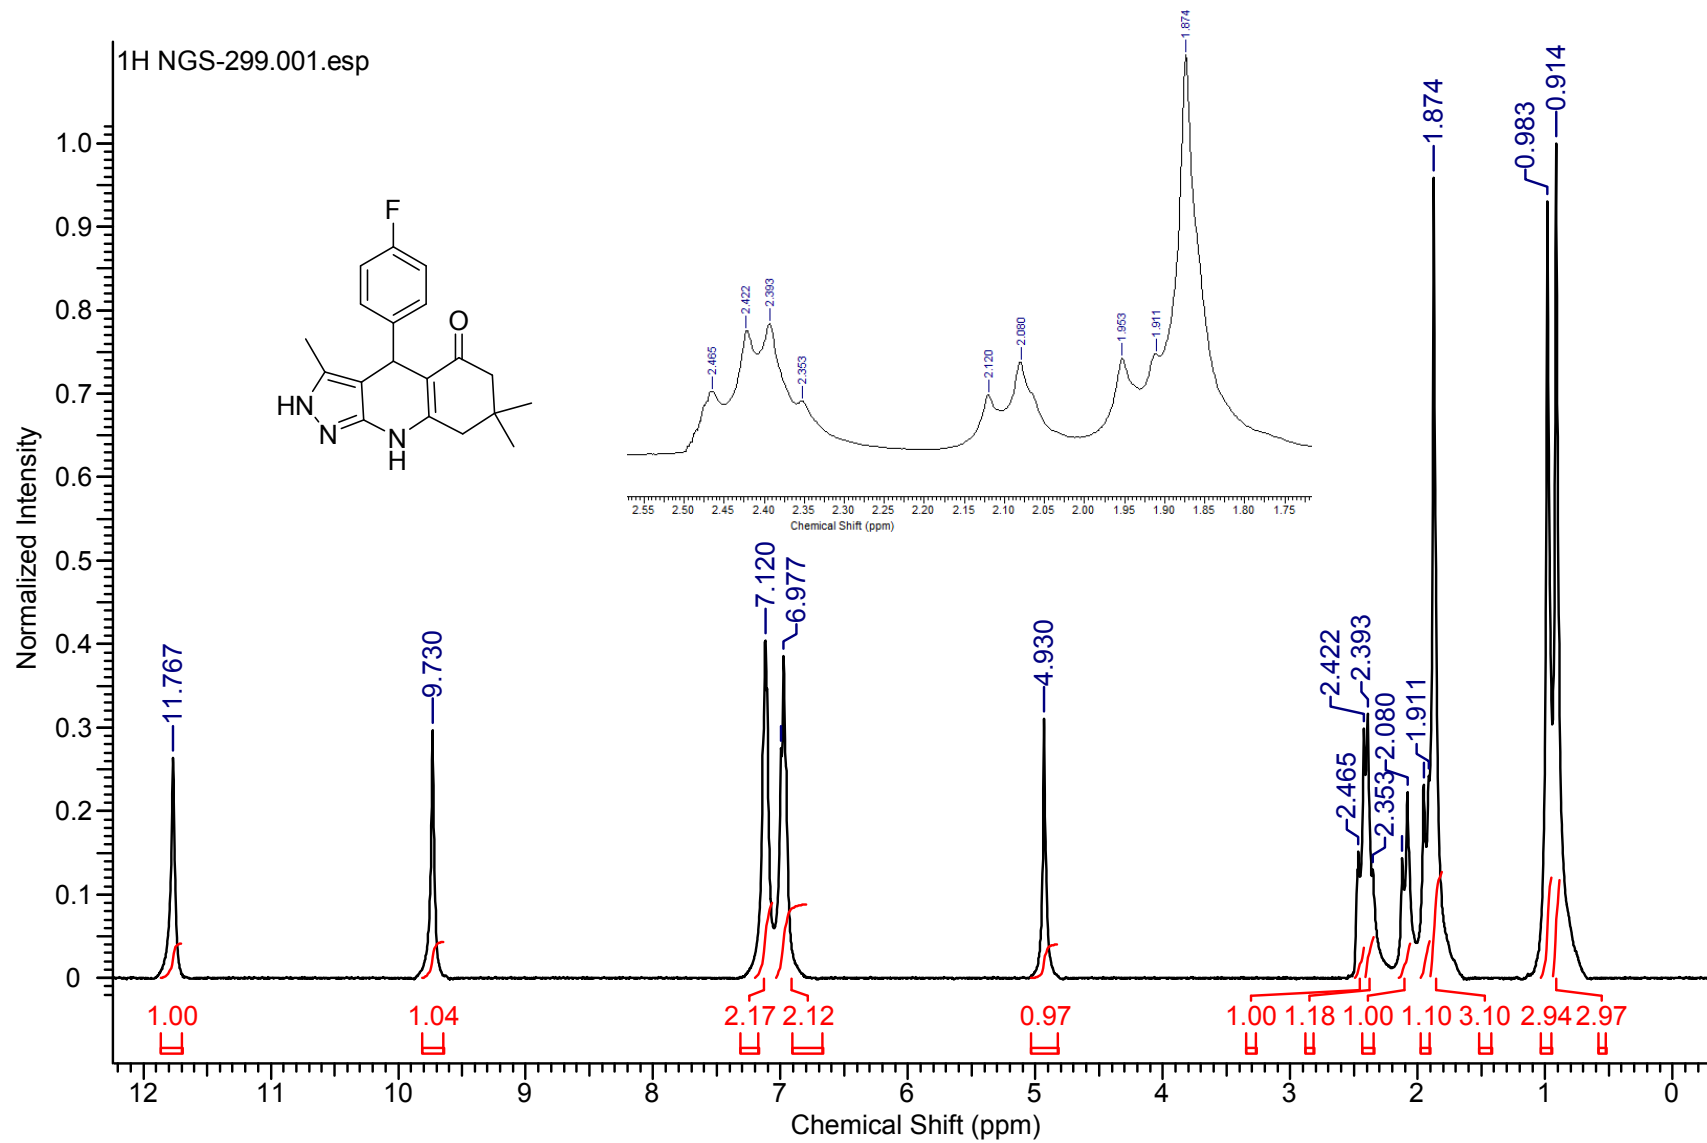



6h

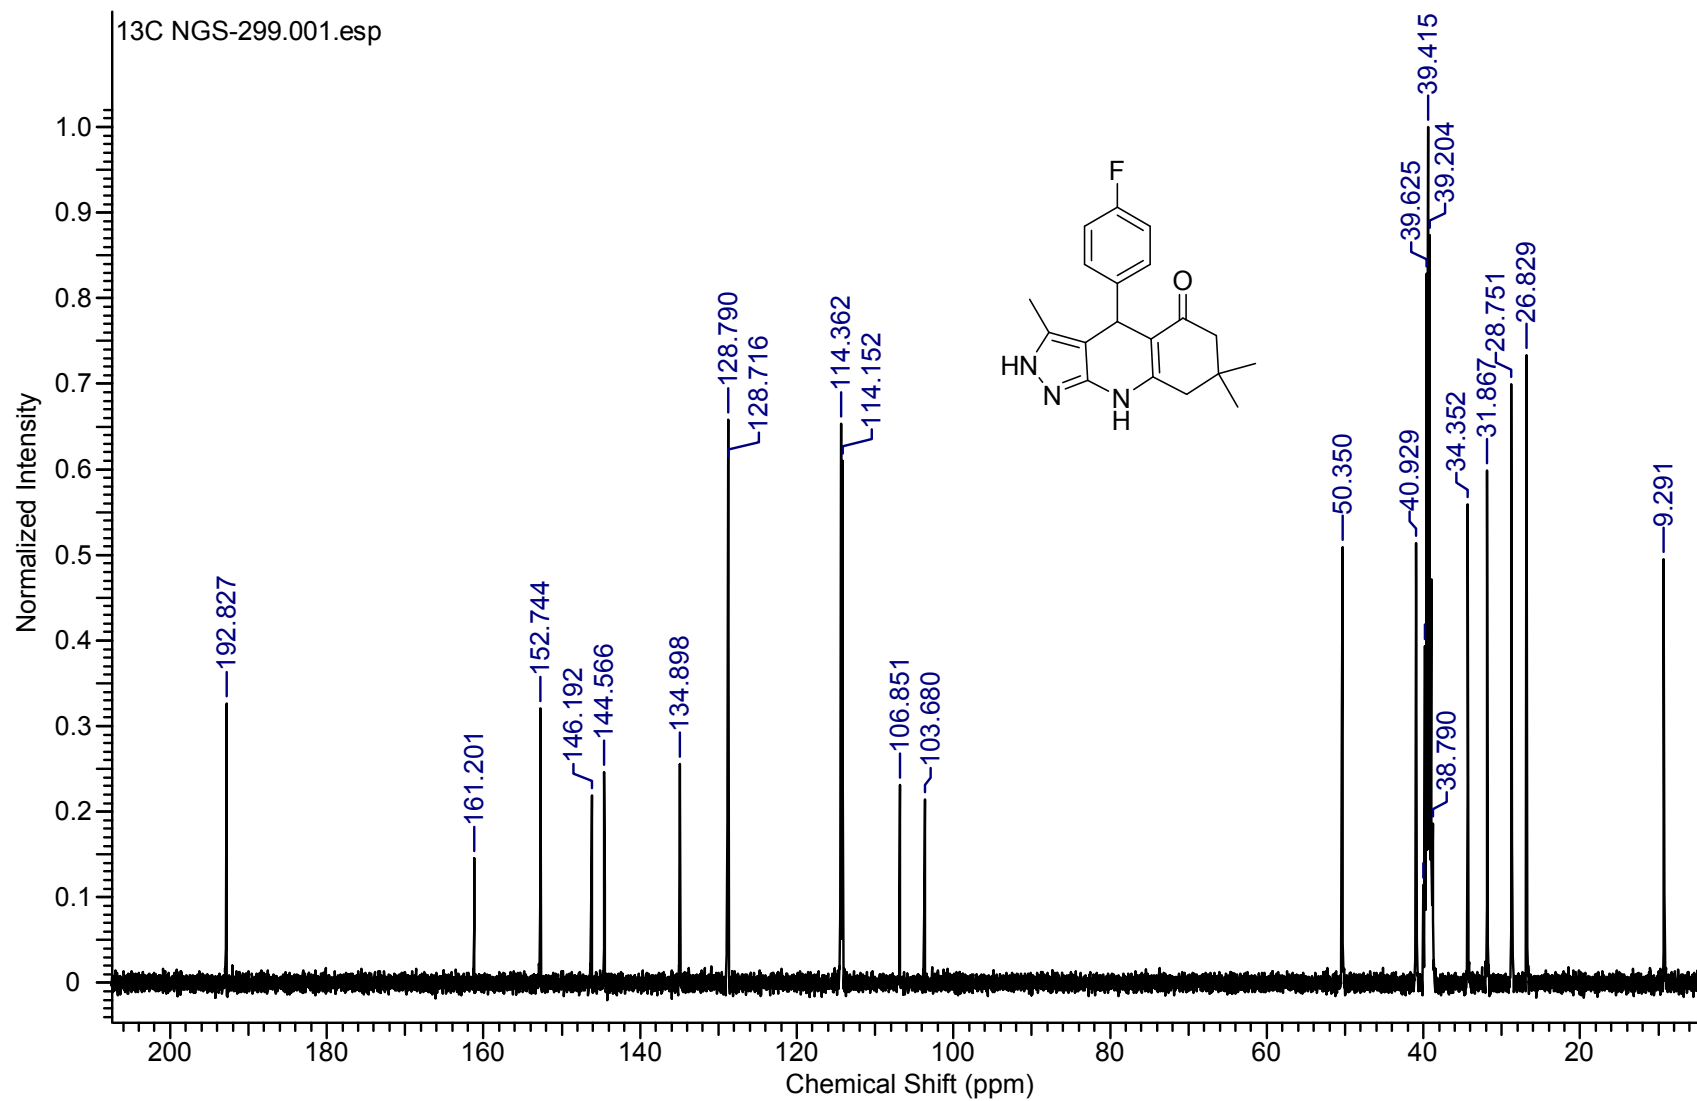

6i

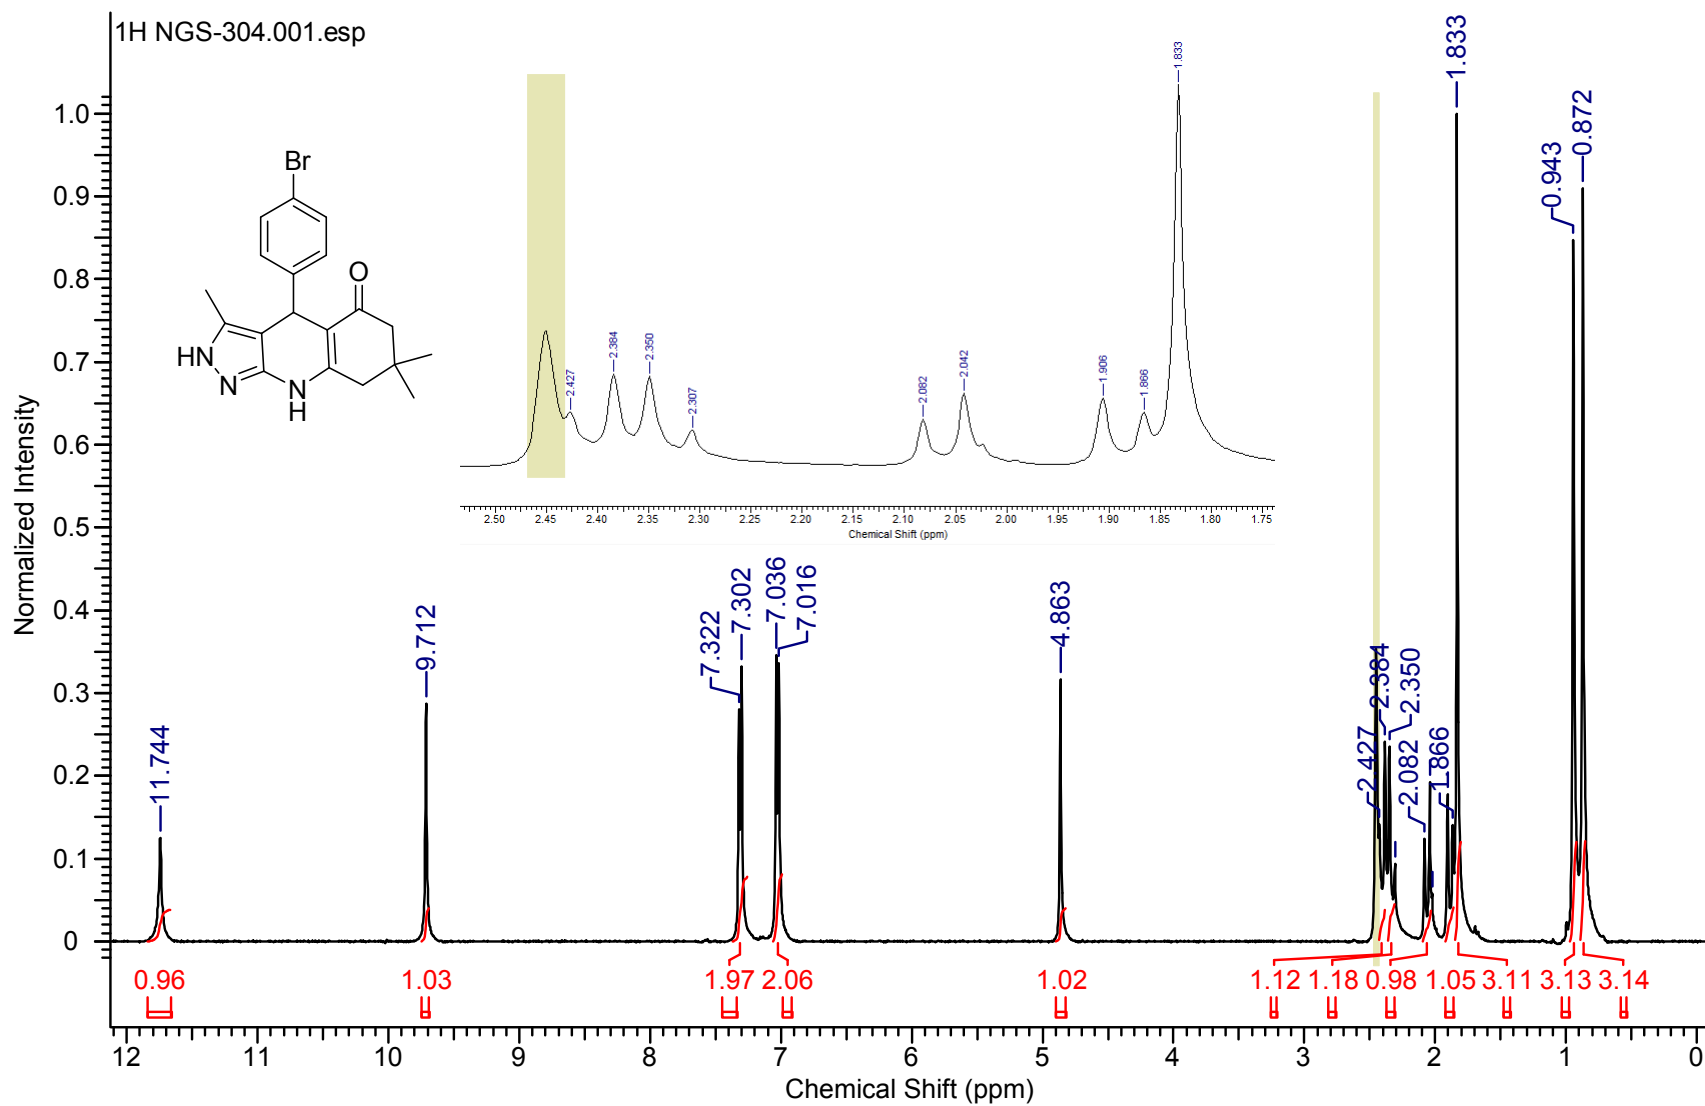

6i

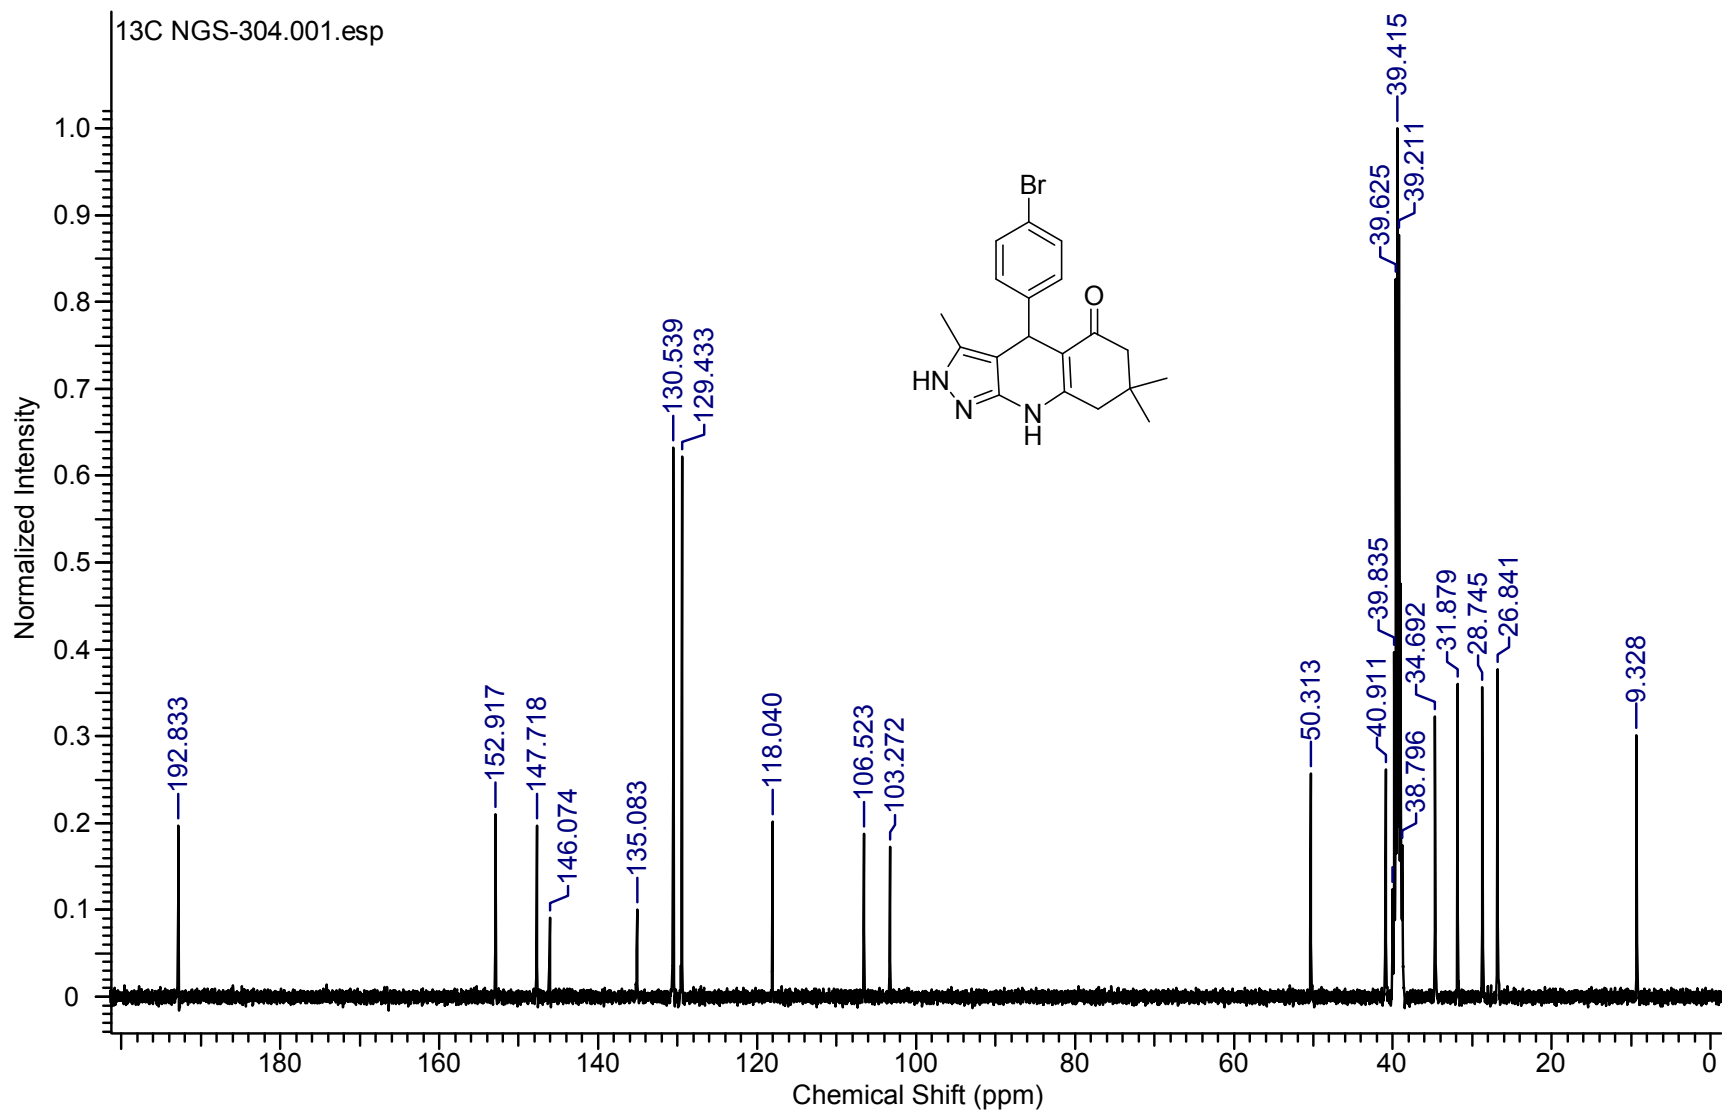

6j

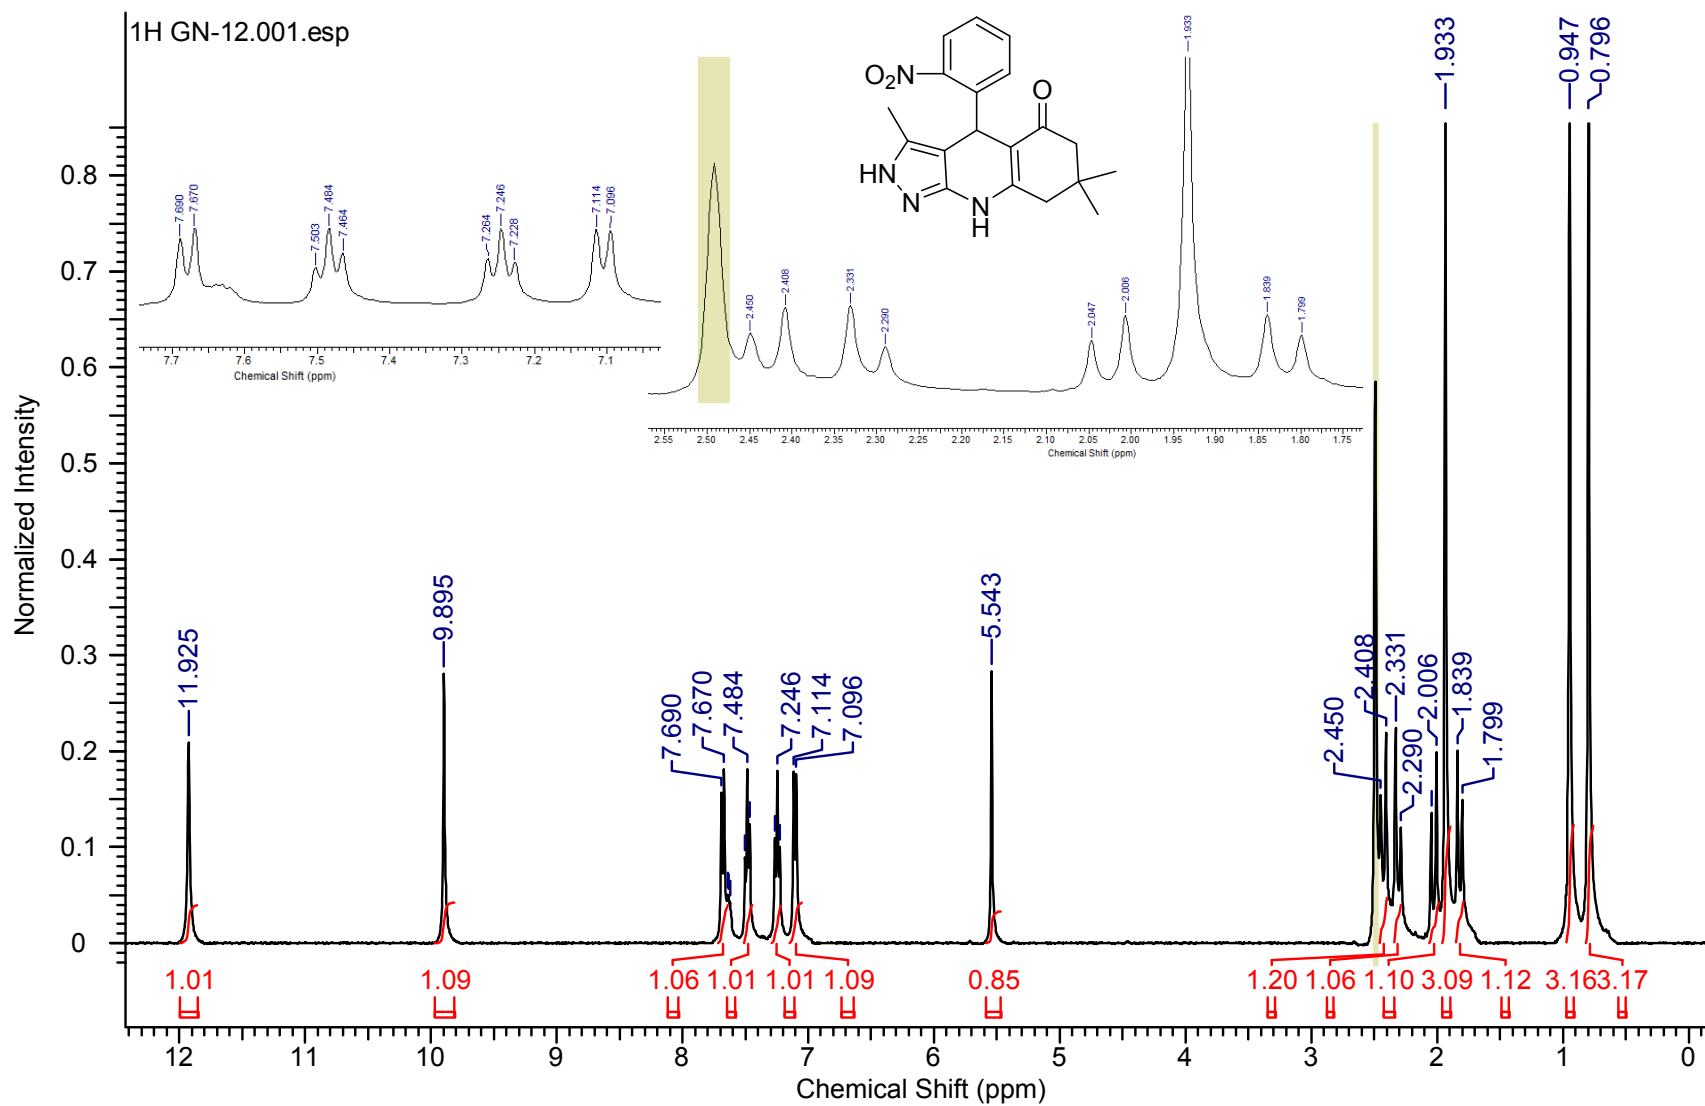

6j

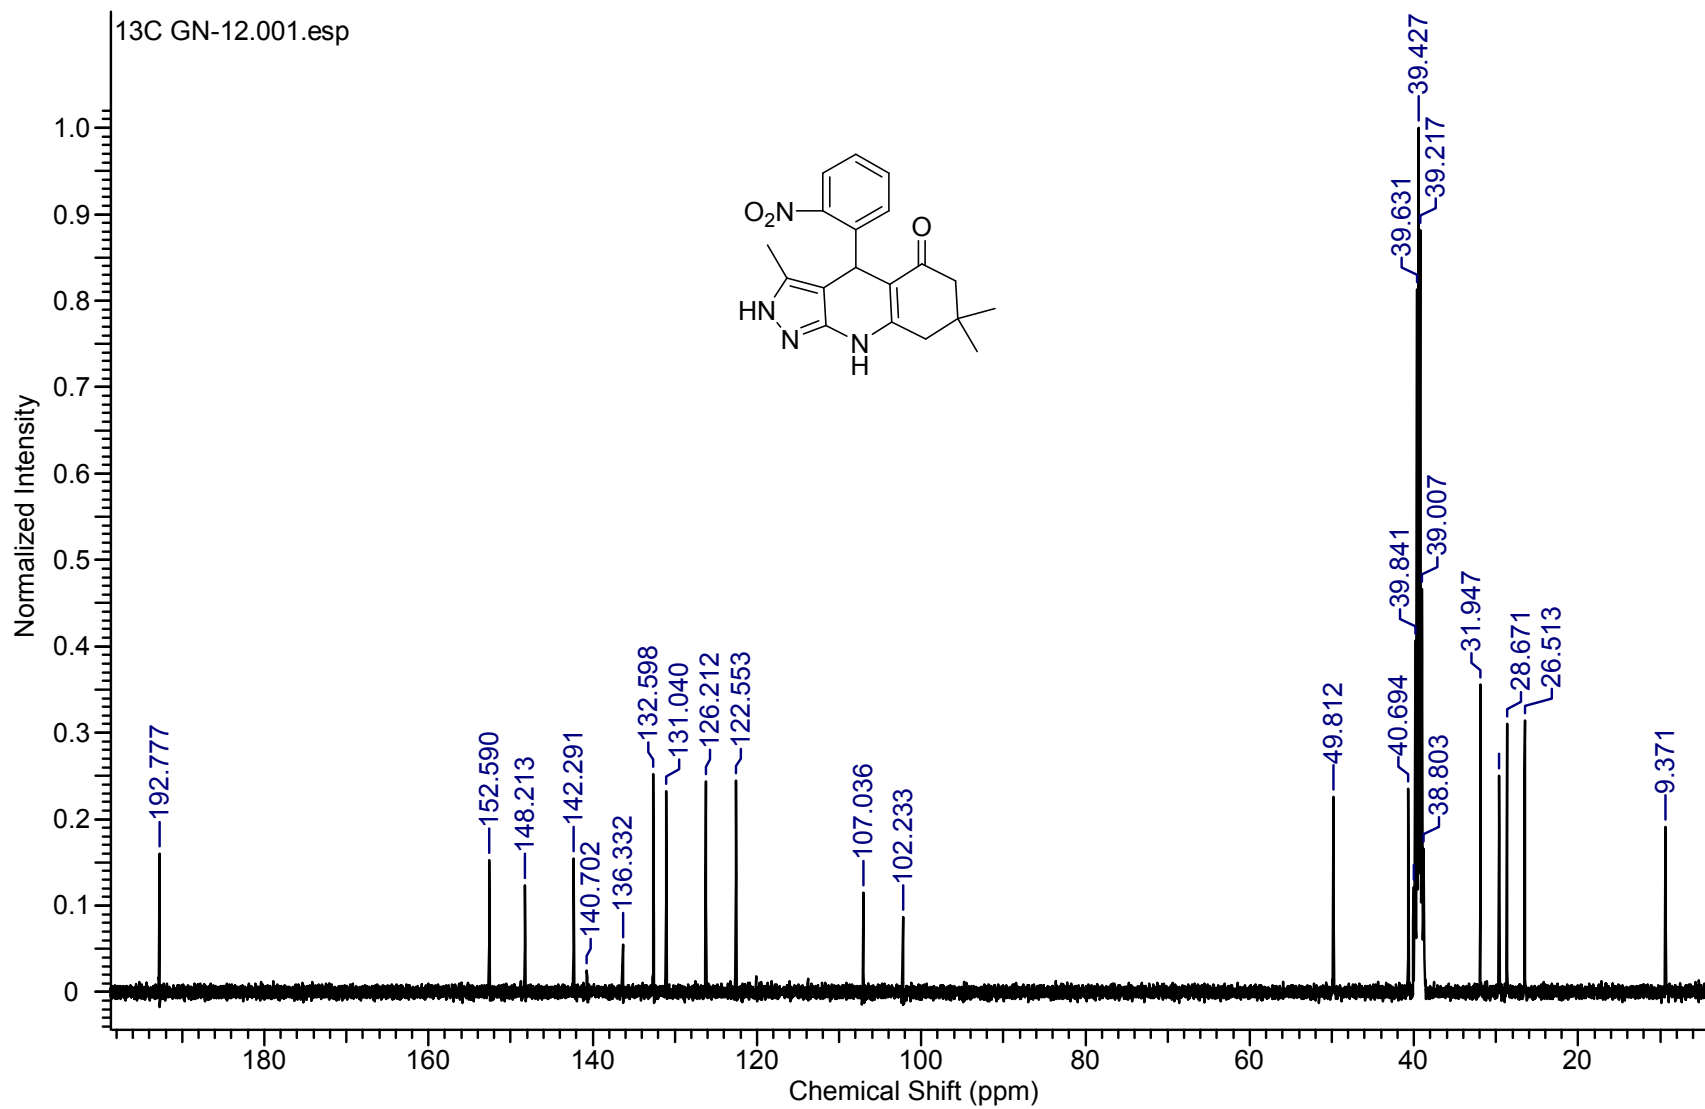

Supplement: c4nj02372b1.pdf [file c4nj02372b1.pdf]
